# Supplementary material
Source: MDPI journal article supplement (https://www.mdpi.com/1424-8247/16/9/1324)

# Discovery of New Pyrrolo[2,3-d]pyrimidine Derivatives as Potential Multi-Targeted Kinase Inhibitors and Apoptosis Inducers

AbdulAziz A. Alotaibi<sup>†</sup>, Mohammed M. Alanazi<sup>\*,†</sup> and A. F. M. Motiur Rahman<sup>\*</sup>

Department of Pharmaceutical Chemistry, College of Pharmacy, King Saud University, Riyadh 11451, Saudi Arabia

\*Corresponding Authors: [mmalanazi@ksu.edu.sa](mailto:mmalanazi@ksu.edu.sa) ;  
[afmrahman@ksu.edu.sa](mailto:afmrahman@ksu.edu.sa)

<sup>†</sup>These authors contributed equally to this work

| Entry     | Content                                  | Page no. | Entry     | Content                                  | Page no. |
|-----------|------------------------------------------|----------|-----------|------------------------------------------|----------|
| <b>3</b>  | <sup>1</sup> H-NMR spectra of <b>3</b>   | 4        | <b>5c</b> | <sup>1</sup> H-NMR spectra of <b>5c</b>  | 21       |
| <b>3</b>  | <sup>1</sup> H-NMR spectra of <b>3</b>   | 5        | <b>5c</b> | <sup>13</sup> C-NMR spectra of <b>5c</b> | 22       |
| <b>3</b>  | <sup>13</sup> C-NMR spectra of <b>3</b>  | 6        | <b>5c</b> | Mass spectra of <b>5c</b>                | 23       |
| <b>3</b>  | Mass spectra of <b>3</b>                 | 7        | <b>5c</b> | HRMS Mass spectra of <b>5c</b>           | 24       |
| <b>3</b>  | HRMS Mass spectra of <b>3</b>            | 8        | <b>5d</b> | <sup>1</sup> H-NMR spectra of <b>5d</b>  | 25       |
| <b>4</b>  | <sup>1</sup> H-NMR spectra of <b>4</b>   | 9        | <b>5d</b> | <sup>13</sup> C-NMR spectra of <b>5d</b> | 26       |
| <b>4</b>  | <sup>13</sup> C-NMR spectra of <b>4</b>  | 10       | <b>5d</b> | Mass spectra of <b>5d</b>                | 27       |
| <b>4</b>  | Mass spectra of <b>4</b>                 | 11       | <b>5d</b> | HRMS Mass spectra of <b>5d</b>           | 28       |
| <b>4</b>  | HRMS Mass spectra of <b>4</b>            | 12       | <b>5e</b> | <sup>1</sup> H-NMR spectra of <b>5e</b>  | 29       |
| <b>5a</b> | <sup>1</sup> H-NMR spectra of <b>5a</b>  | 13       | <b>5e</b> | <sup>13</sup> C-NMR spectra of <b>5e</b> | 30       |
| <b>5a</b> | <sup>13</sup> C-NMR spectra of <b>5a</b> | 14       | <b>5e</b> | Mass spectra of <b>5e</b>                | 31       |
| <b>5a</b> | Mass spectra of <b>5a</b>                | 15       | <b>5e</b> | HRMS Mass spectra of <b>5e</b>           | 32       |
| <b>5a</b> | HRMS Mass spectra of <b>5a</b>           | 16       | <b>5f</b> | <sup>1</sup> H-NMR spectra of <b>5f</b>  | 33       |
| <b>5b</b> | <sup>1</sup> H-NMR spectra of <b>5b</b>  | 17       | <b>5f</b> | <sup>13</sup> C-NMR spectra of <b>5f</b> | 34       |
| <b>5b</b> | <sup>13</sup> C-NMR spectra of <b>5b</b> | 18       | <b>5f</b> | Mass spectra of <b>5f</b>                | 35       |
| <b>5b</b> | Mass spectra of <b>5b</b>                | 19       | <b>5f</b> | HRMS Mass spectra of <b>5f</b>           | 36       |
| <b>5b</b> | HRMS Mass spectra of <b>5b</b>           | 20       | <b>5g</b> | <sup>1</sup> H-NMR spectra of <b>5g</b>  | 37       |

| Entry     | Content                                  | Page no. | Entry     | Content                                  | Page no. |
|-----------|------------------------------------------|----------|-----------|------------------------------------------|----------|
| <b>5g</b> | <sup>13</sup> C-NMR spectra of <b>5g</b> | 38       | <b>5k</b> | HRMS Mass spectra of <b>5k</b>           | 56       |
| <b>5g</b> | Mass spectra of <b>5g</b>                | 39       | <b>5l</b> | <sup>1</sup> H-NMR spectra of <b>5l</b>  | 57       |
| <b>5g</b> | HRMS Mass spectra of <b>5g</b>           | 40       | <b>5l</b> | <sup>13</sup> C-NMR spectra of <b>5l</b> | 58       |
| <b>5h</b> | <sup>1</sup> H-NMR spectra of <b>5h</b>  | 41       | <b>5l</b> | Mass spectra of <b>5l</b>                | 59       |
| <b>5h</b> | <sup>13</sup> C-NMR spectra of <b>5h</b> | 42       | <b>5l</b> | HRMS Mass spectra of <b>5l</b>           | 50       |
| <b>5h</b> | Mass spectra of <b>5h</b>                | 43       | <b>5m</b> | <sup>1</sup> H-NMR spectra of <b>5m</b>  | 51       |
| <b>5h</b> | HRMS Mass spectra of <b>5h</b>           | 44       | <b>5m</b> | <sup>13</sup> C-NMR spectra of <b>5m</b> | 52       |
| <b>5i</b> | <sup>1</sup> H-NMR spectra of <b>5i</b>  | 45       | <b>5m</b> | Mass spectra of <b>5m</b>                | 63       |
| <b>5i</b> | <sup>13</sup> C-NMR spectra of <b>5i</b> | 46       | <b>5m</b> | HRMS Mass spectra of <b>5m</b>           | 64       |
| <b>5i</b> | Mass spectra of <b>5i</b>                | 47       |           |                                          |          |
| <b>5i</b> | HRMS Mass spectra of <b>5i</b>           | 48       |           |                                          |          |
| <b>5j</b> | <sup>1</sup> H-NMR spectra of <b>5j</b>  | 49       |           |                                          |          |
| <b>5j</b> | <sup>13</sup> C-NMR spectra of <b>5j</b> | 50       |           |                                          |          |
| <b>5j</b> | Mass spectra of <b>5j</b>                | 51       |           |                                          |          |
| <b>5j</b> | HRMS Mass spectra of <b>5j</b>           | 52       |           |                                          |          |
| <b>5k</b> | <sup>1</sup> H-NMR spectra of <b>5k</b>  | 53       |           |                                          |          |
| <b>5k</b> | <sup>13</sup> C-NMR spectra of <b>5k</b> | 54       |           |                                          |          |
| <b>5k</b> | Mass spectra of <b>5k</b>                | 55       |           |                                          |          |

<sup>1</sup>H-NMR spectra of **3**

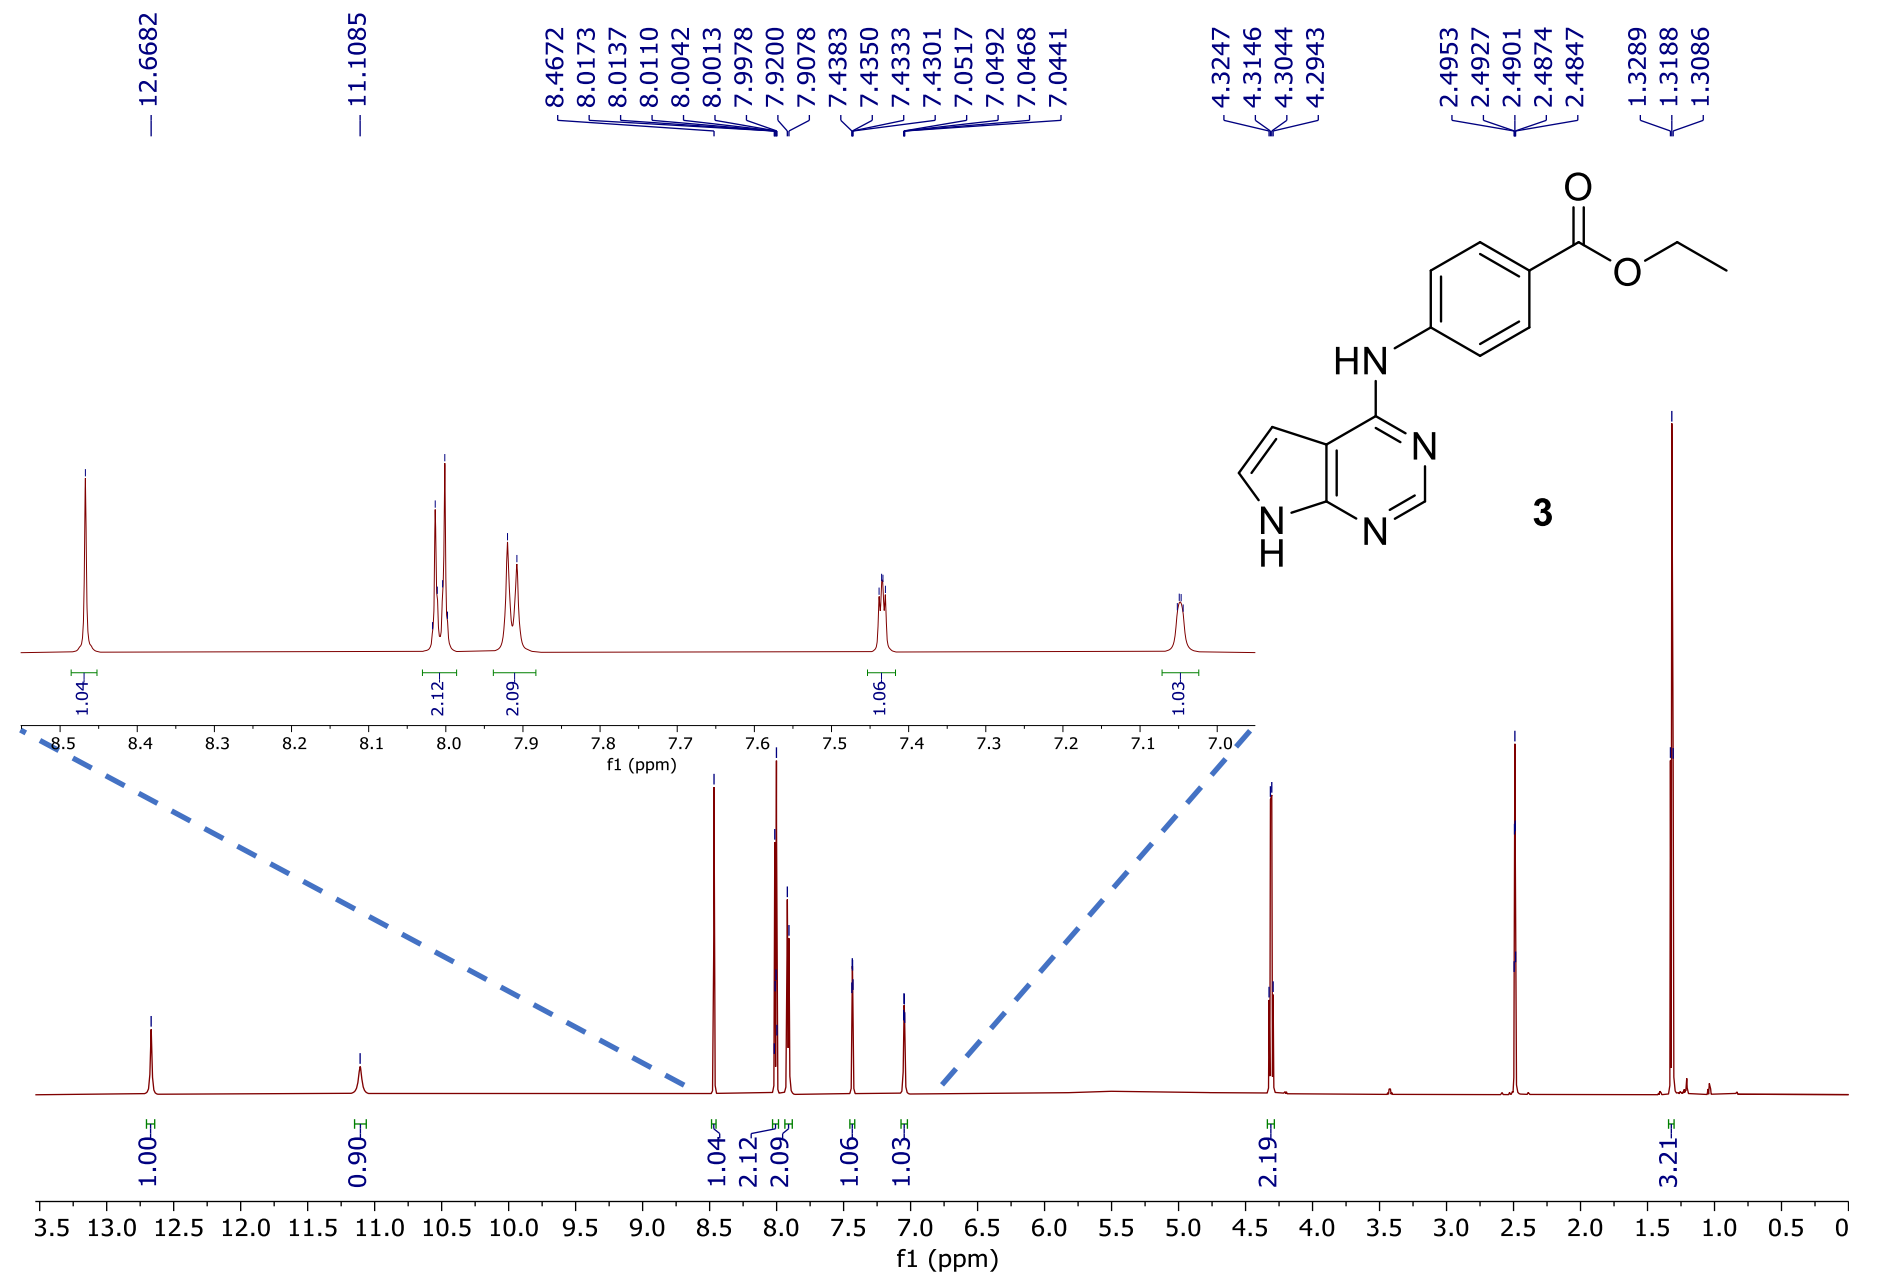

<sup>13</sup>C-NMR spectra of **3**

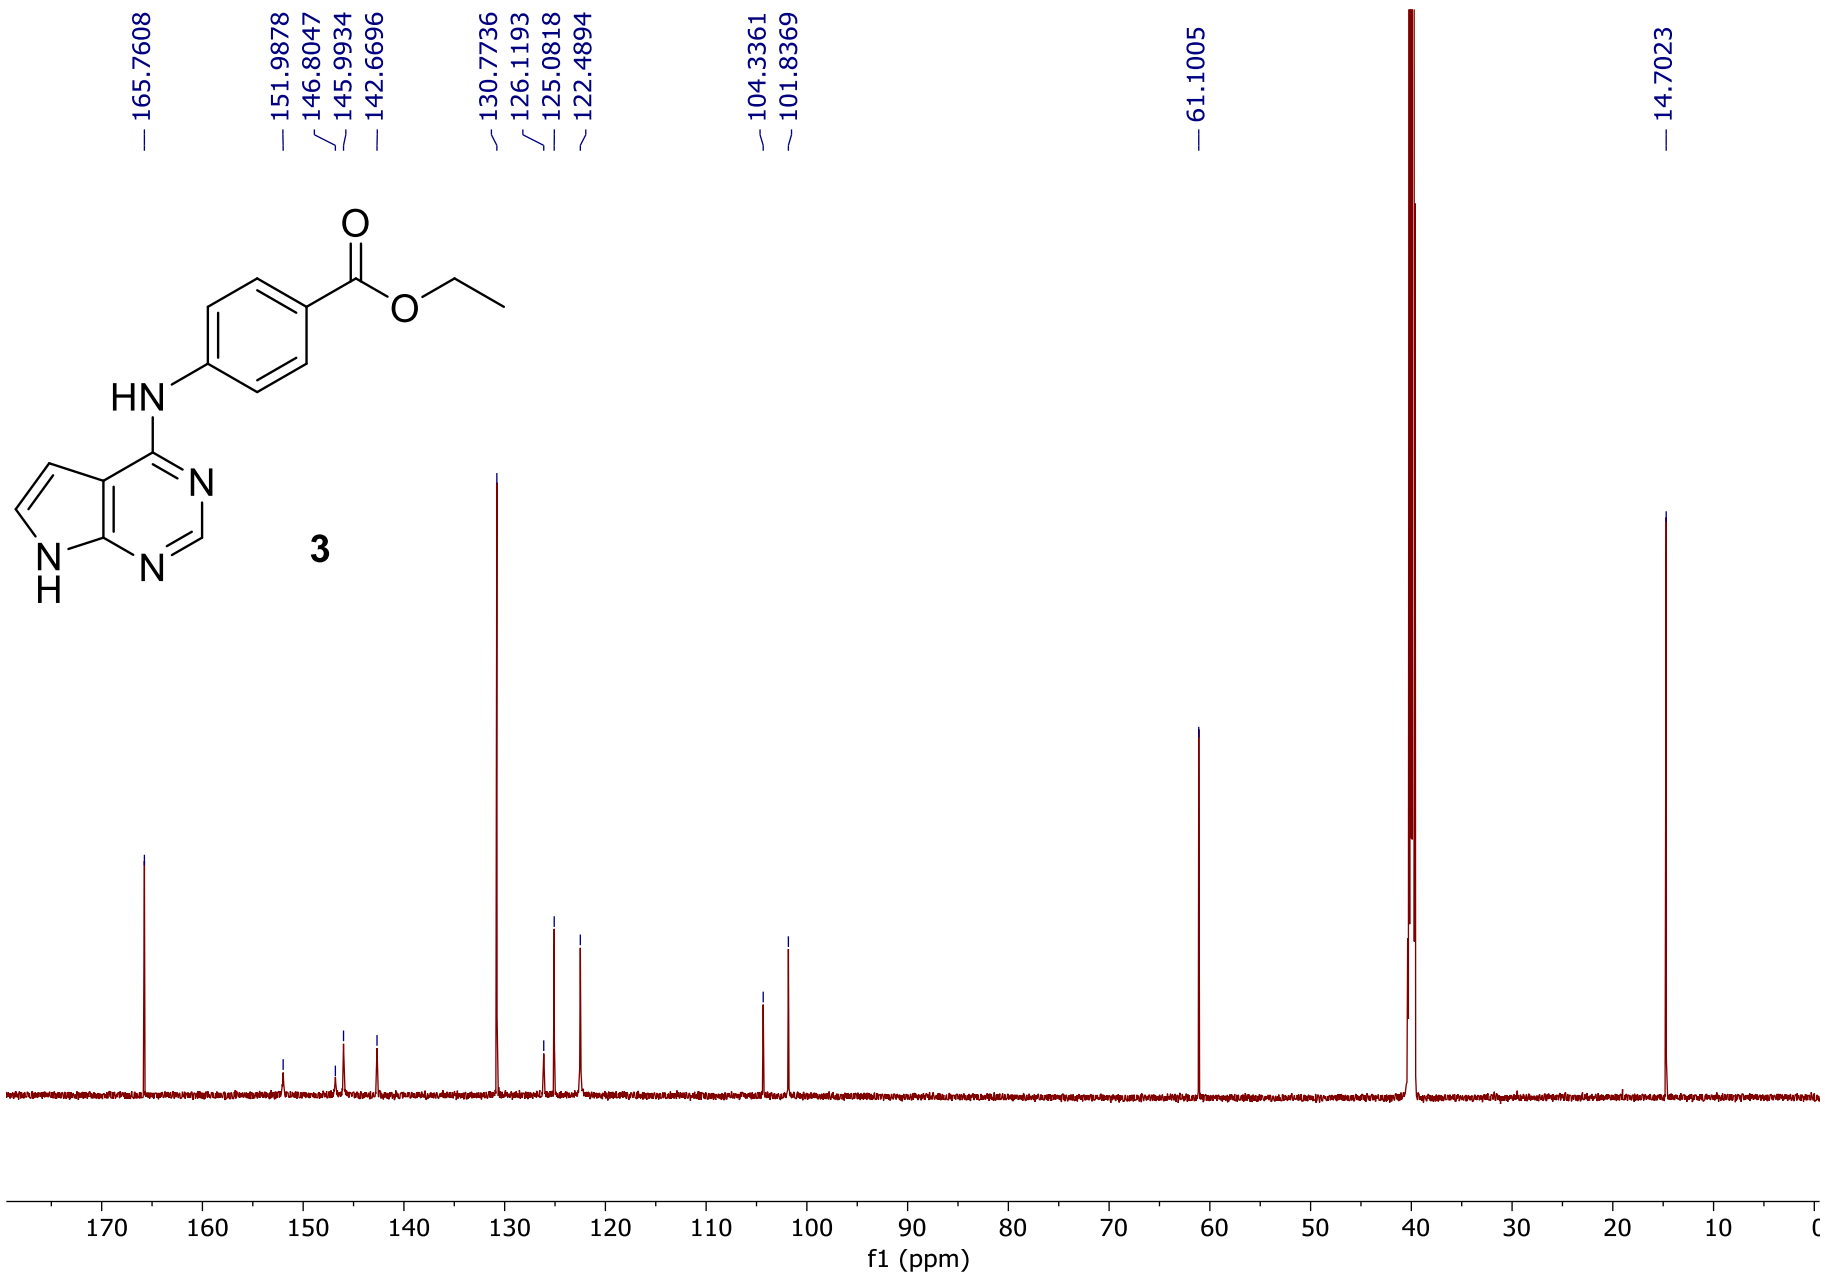

<sup>13</sup>C-NMR (DEPT135) spectra of 3

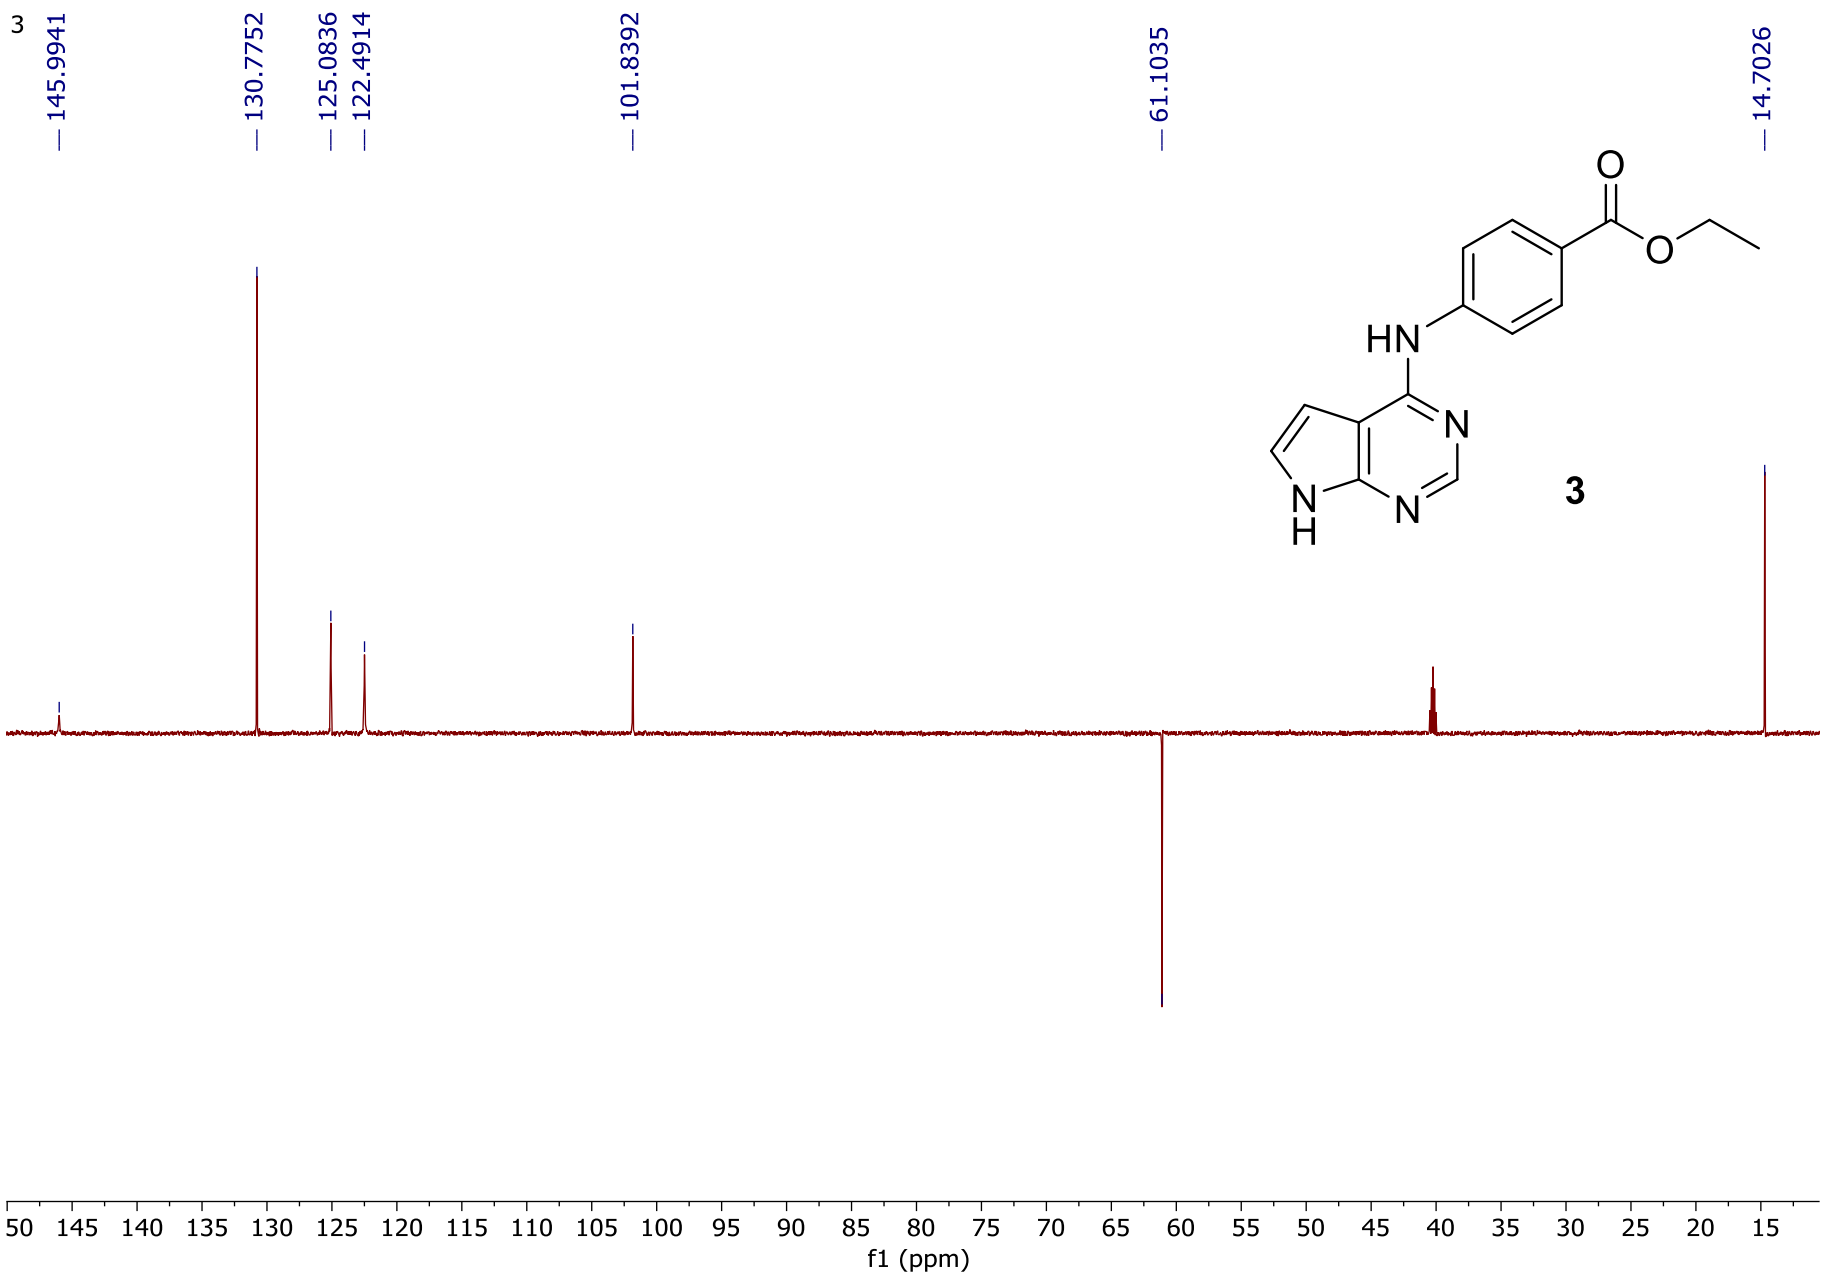

Mass spectra of **3**

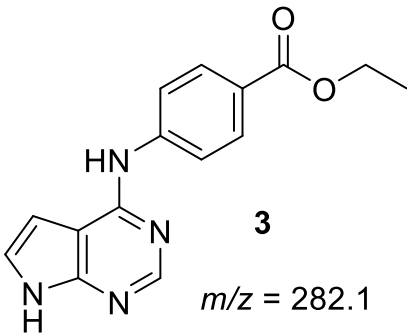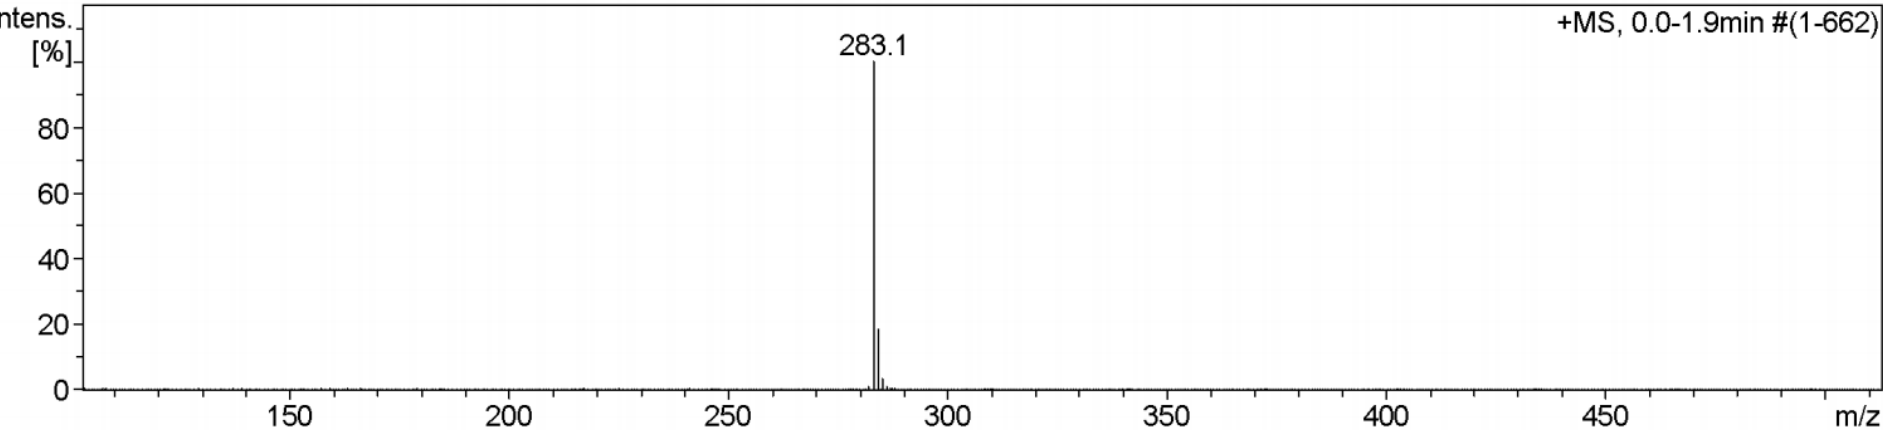

HMRS Mass spectra of **3**

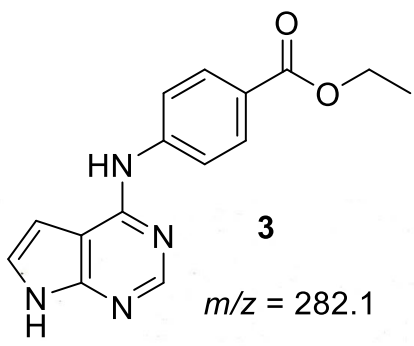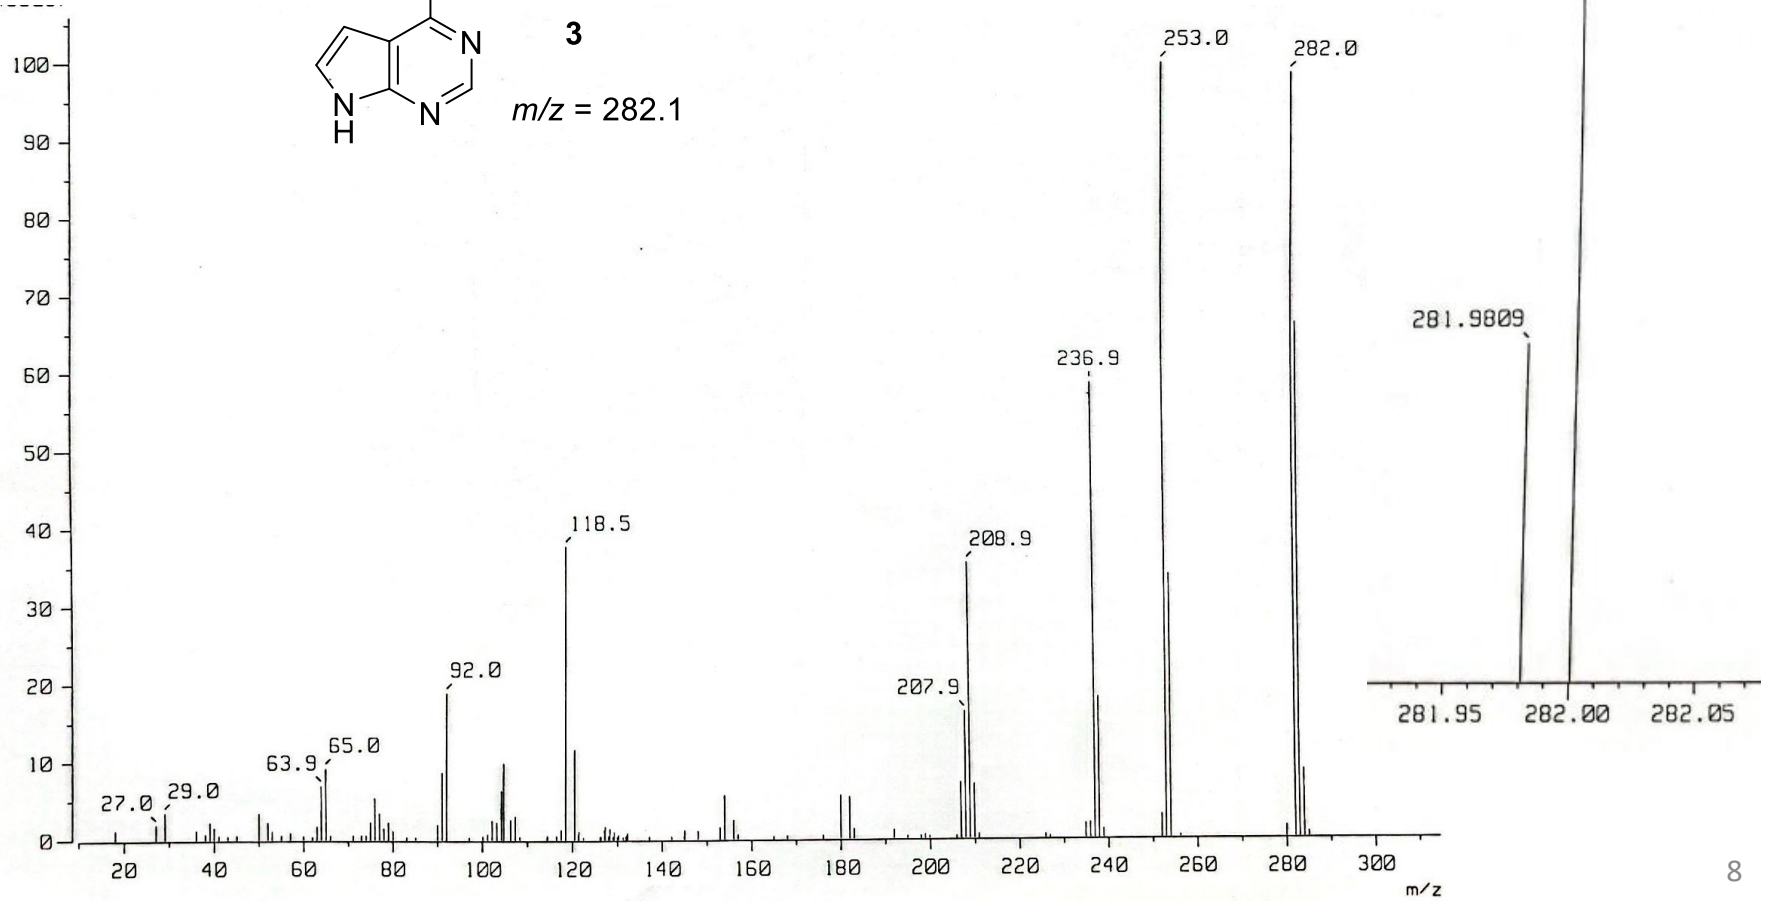



<sup>1</sup>H-NMR spectra of **4**

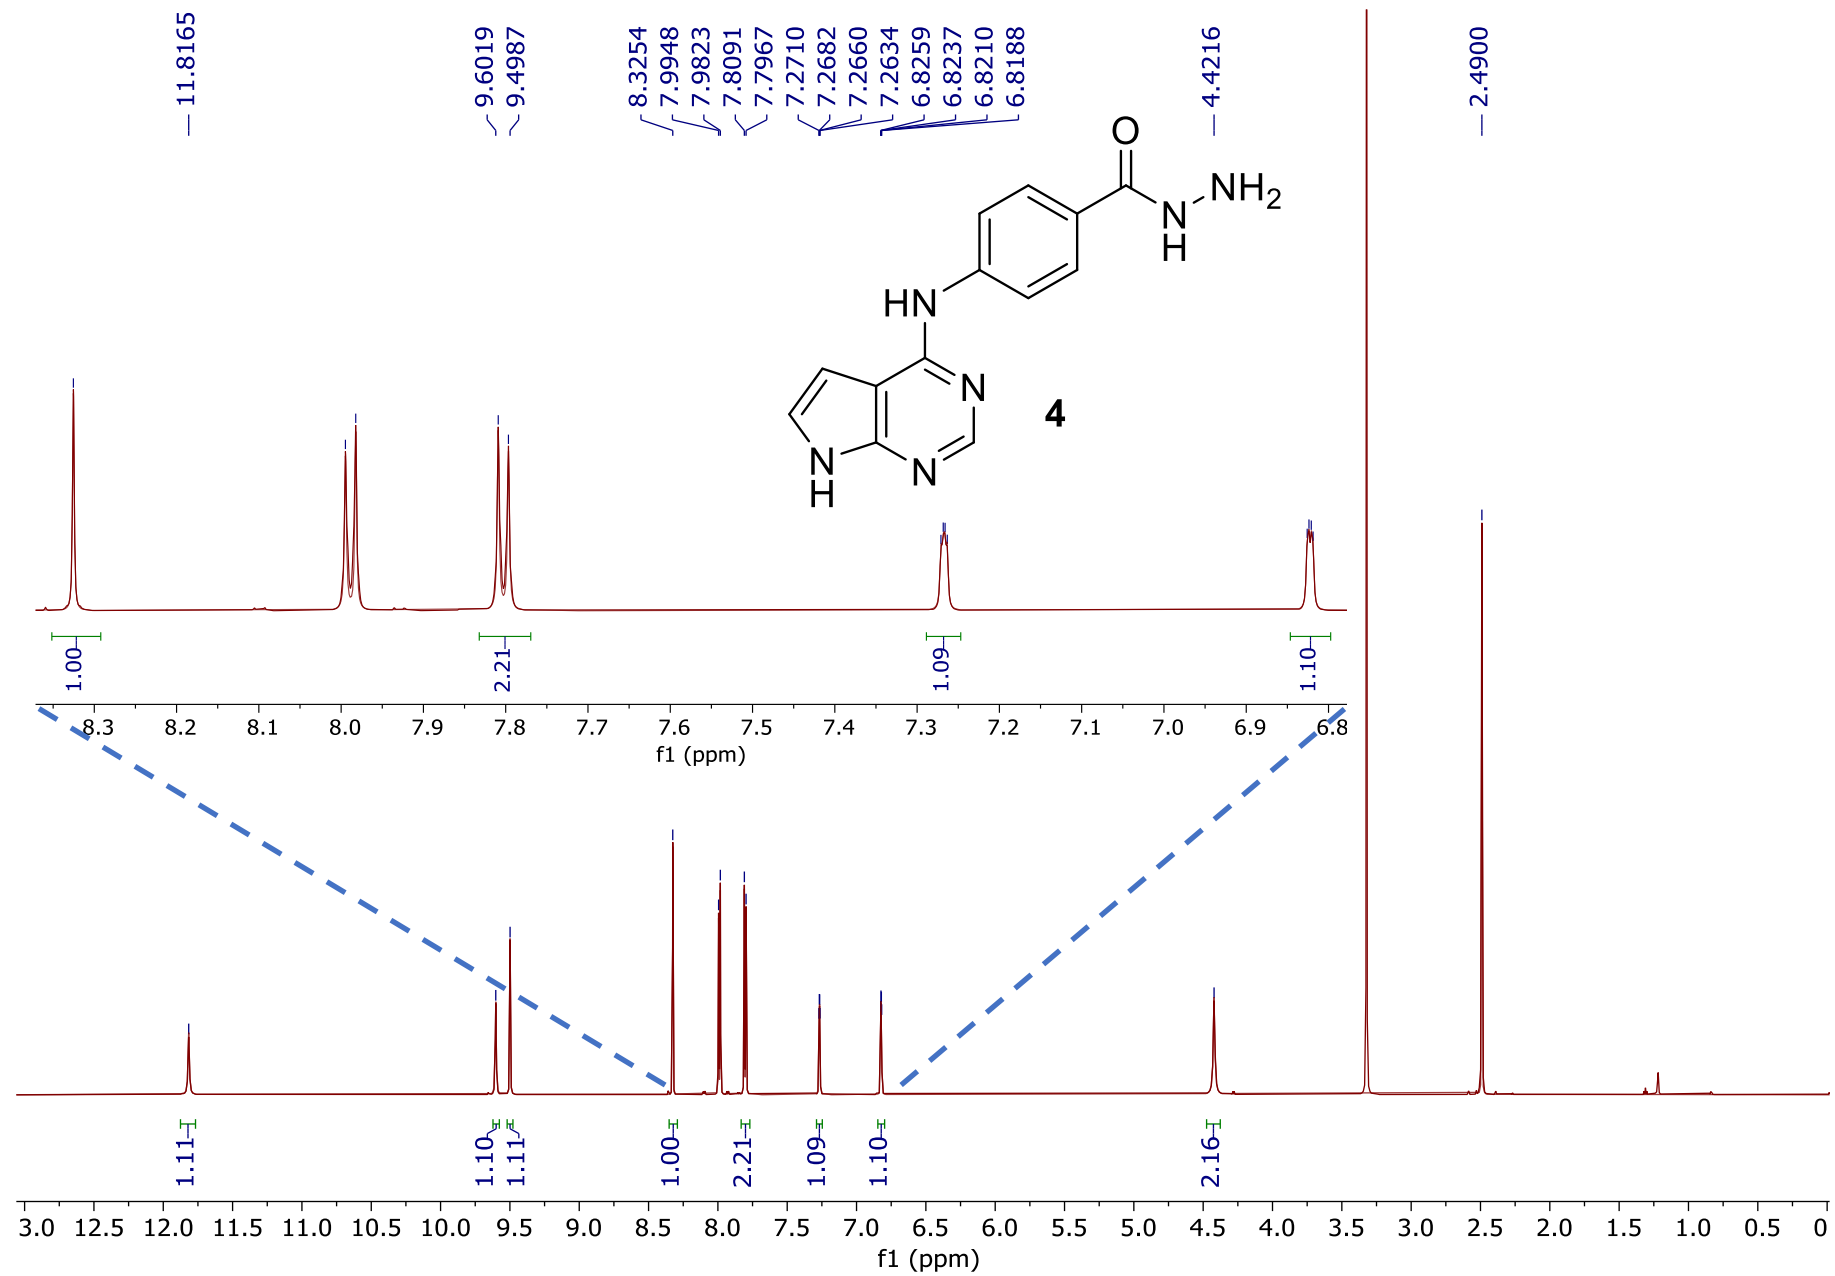

<sup>13</sup>C-NMR spectra of **4**

- 166.2594
- ~ 153.5864
- ~ 151.4967
- ~ 151.0869
- 143.6146
- ~ 128.0365
- ~ 126.6657
- ~ 123.1001
- ~ 119.3290
- 104.5228
- 99.1918

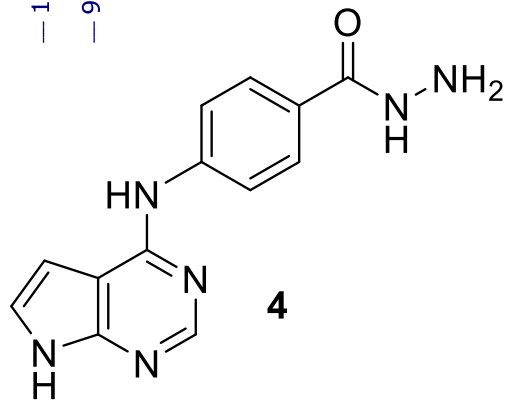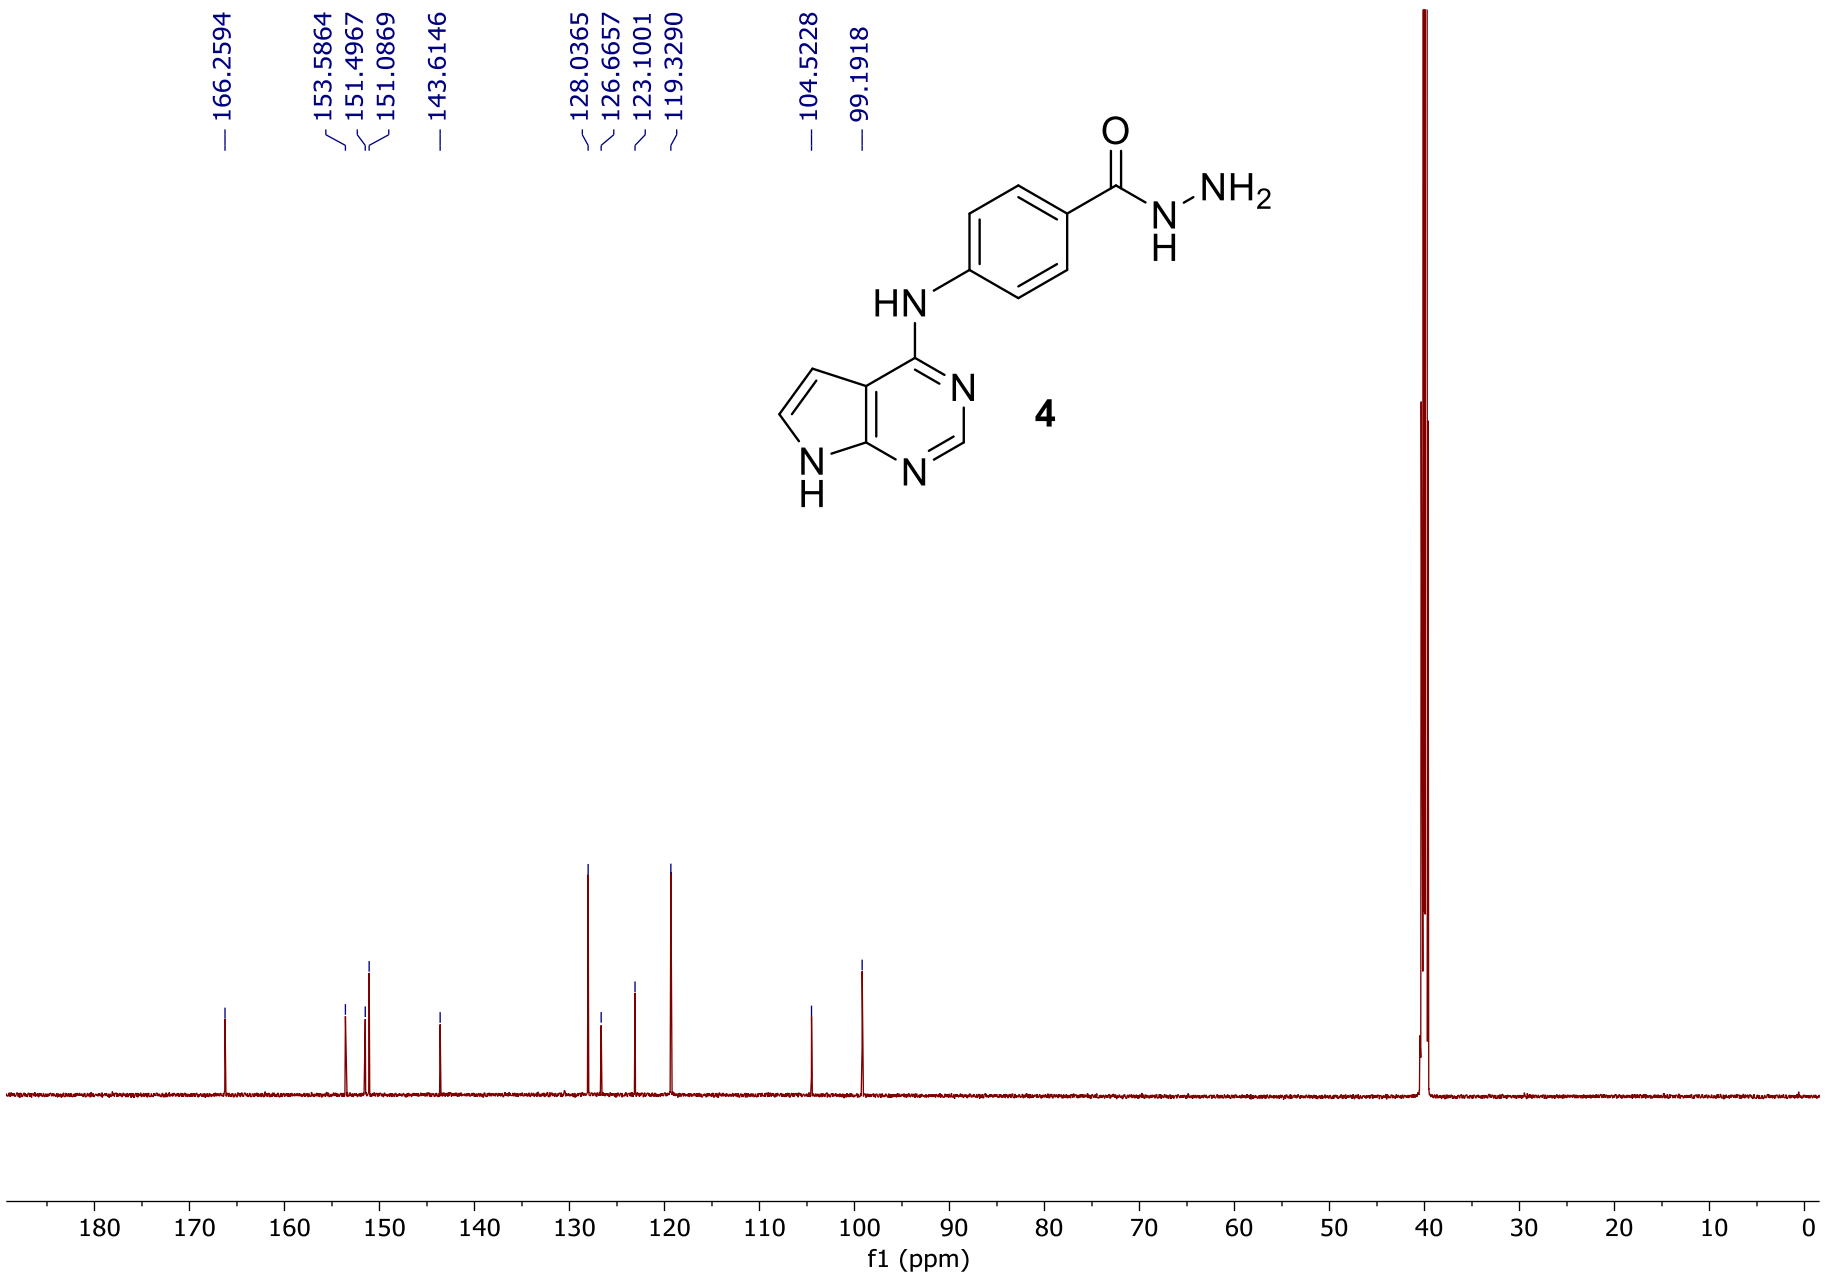

Mass spectra of **4**

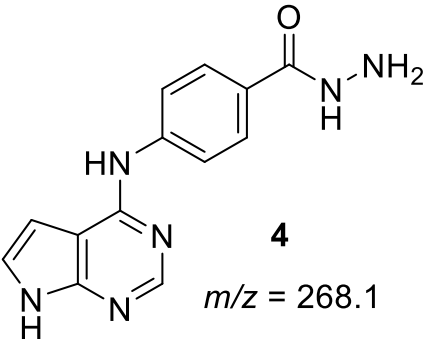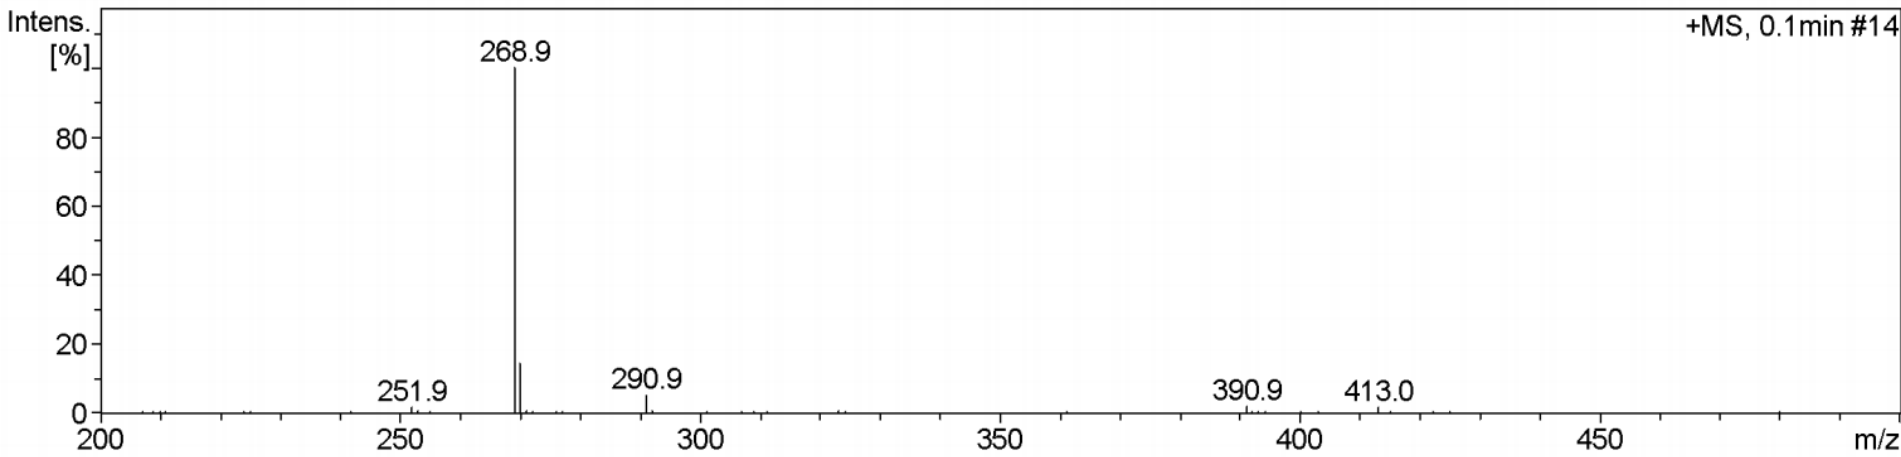

HMRS Mass spectra of **4**

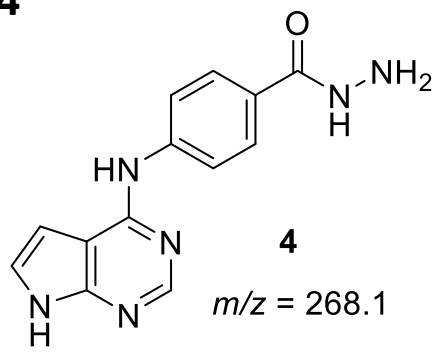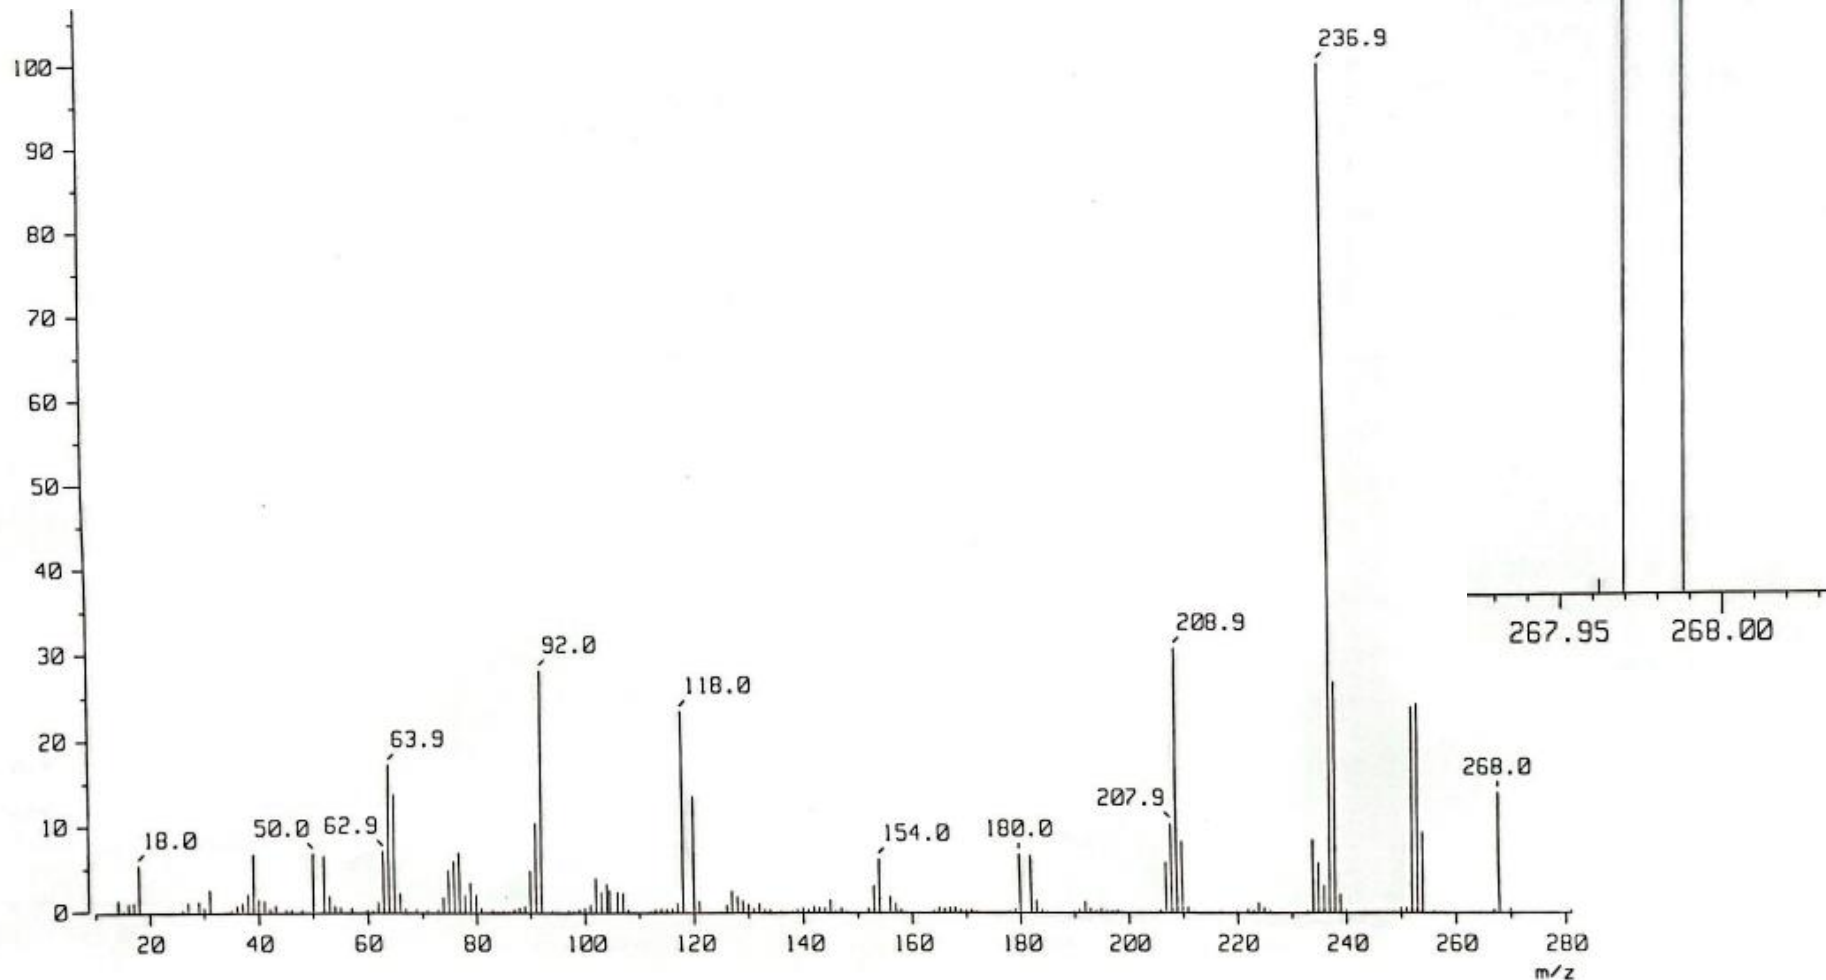

<sup>1</sup>H-NMR spectra of **5a**

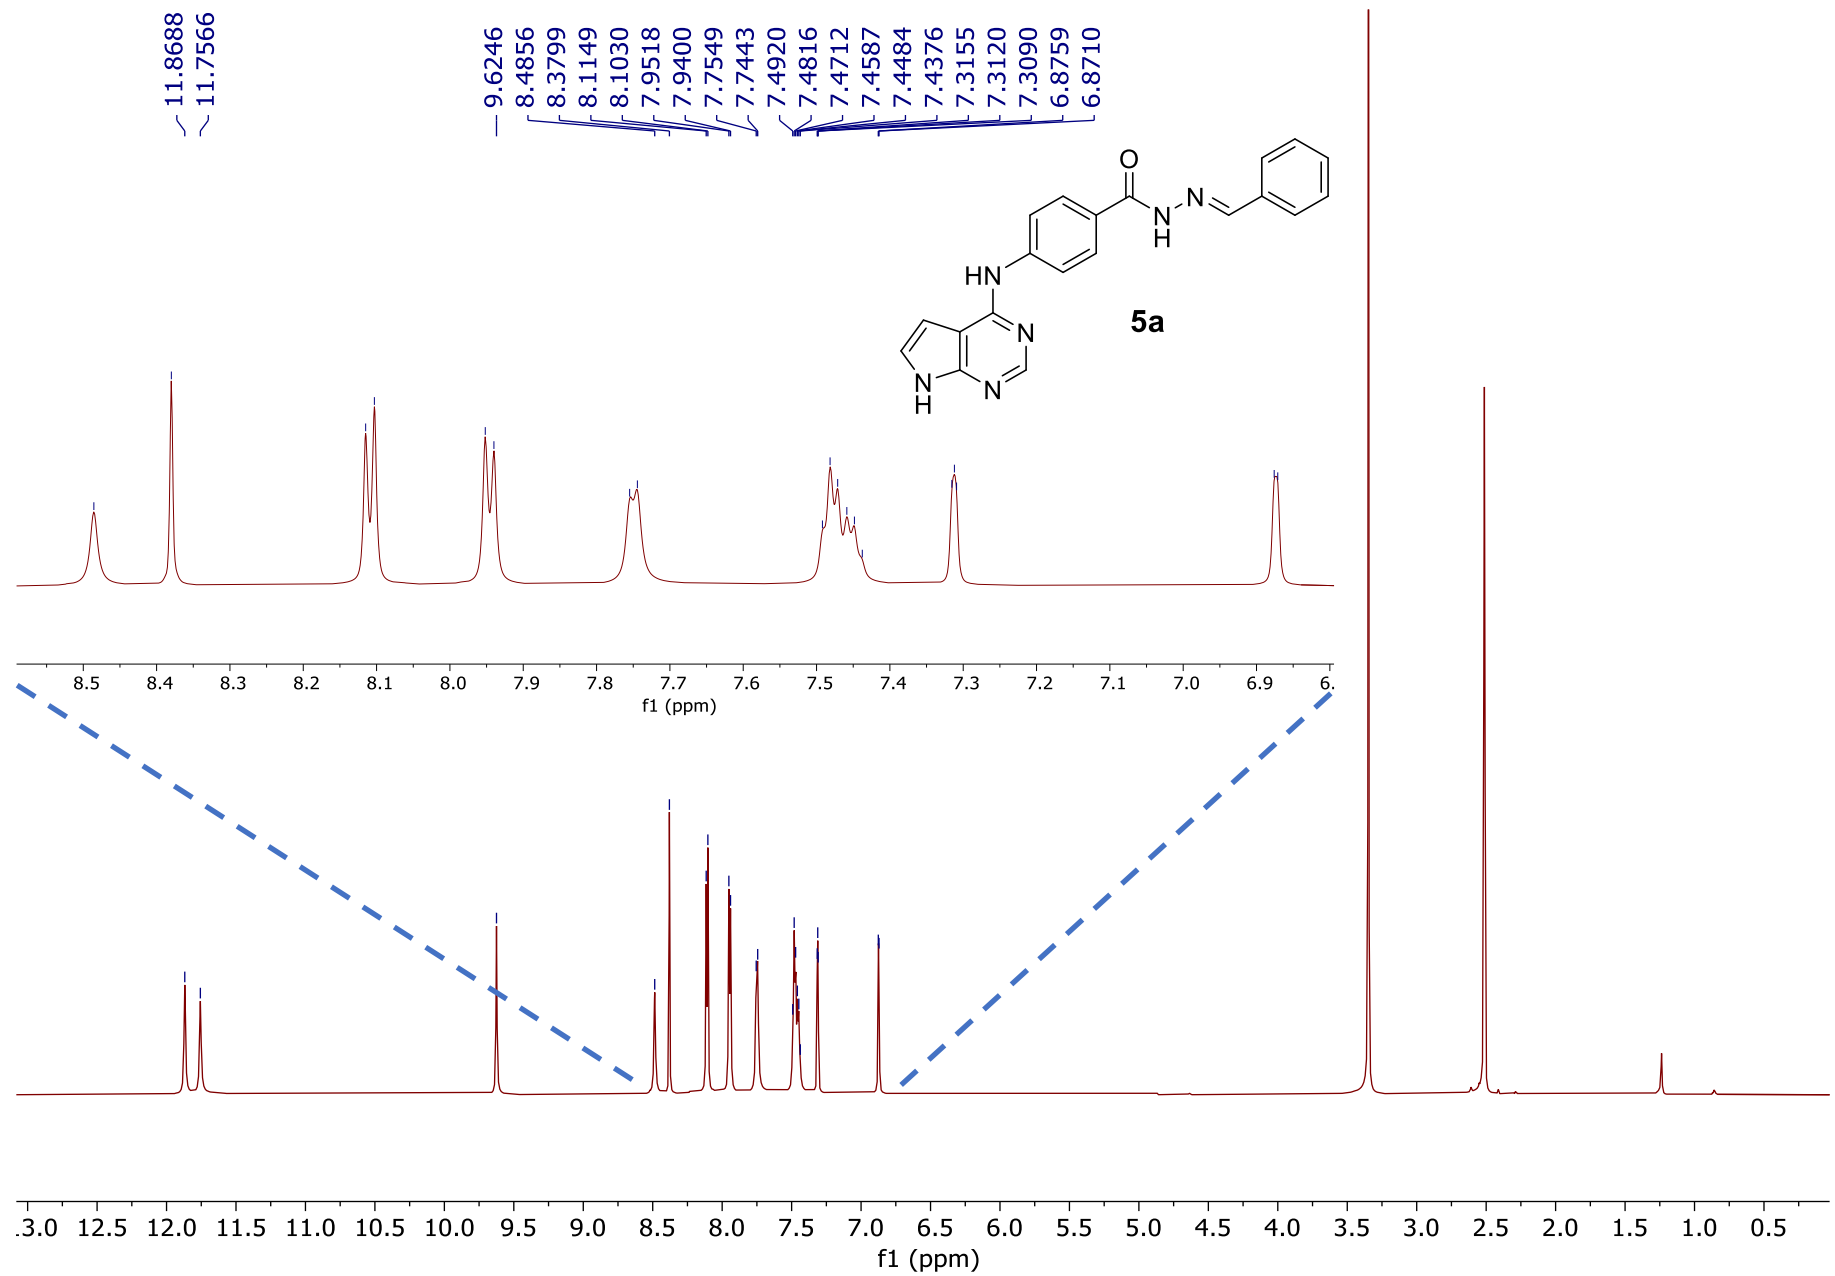

<sup>13</sup>C-NMR spectra of **5a**

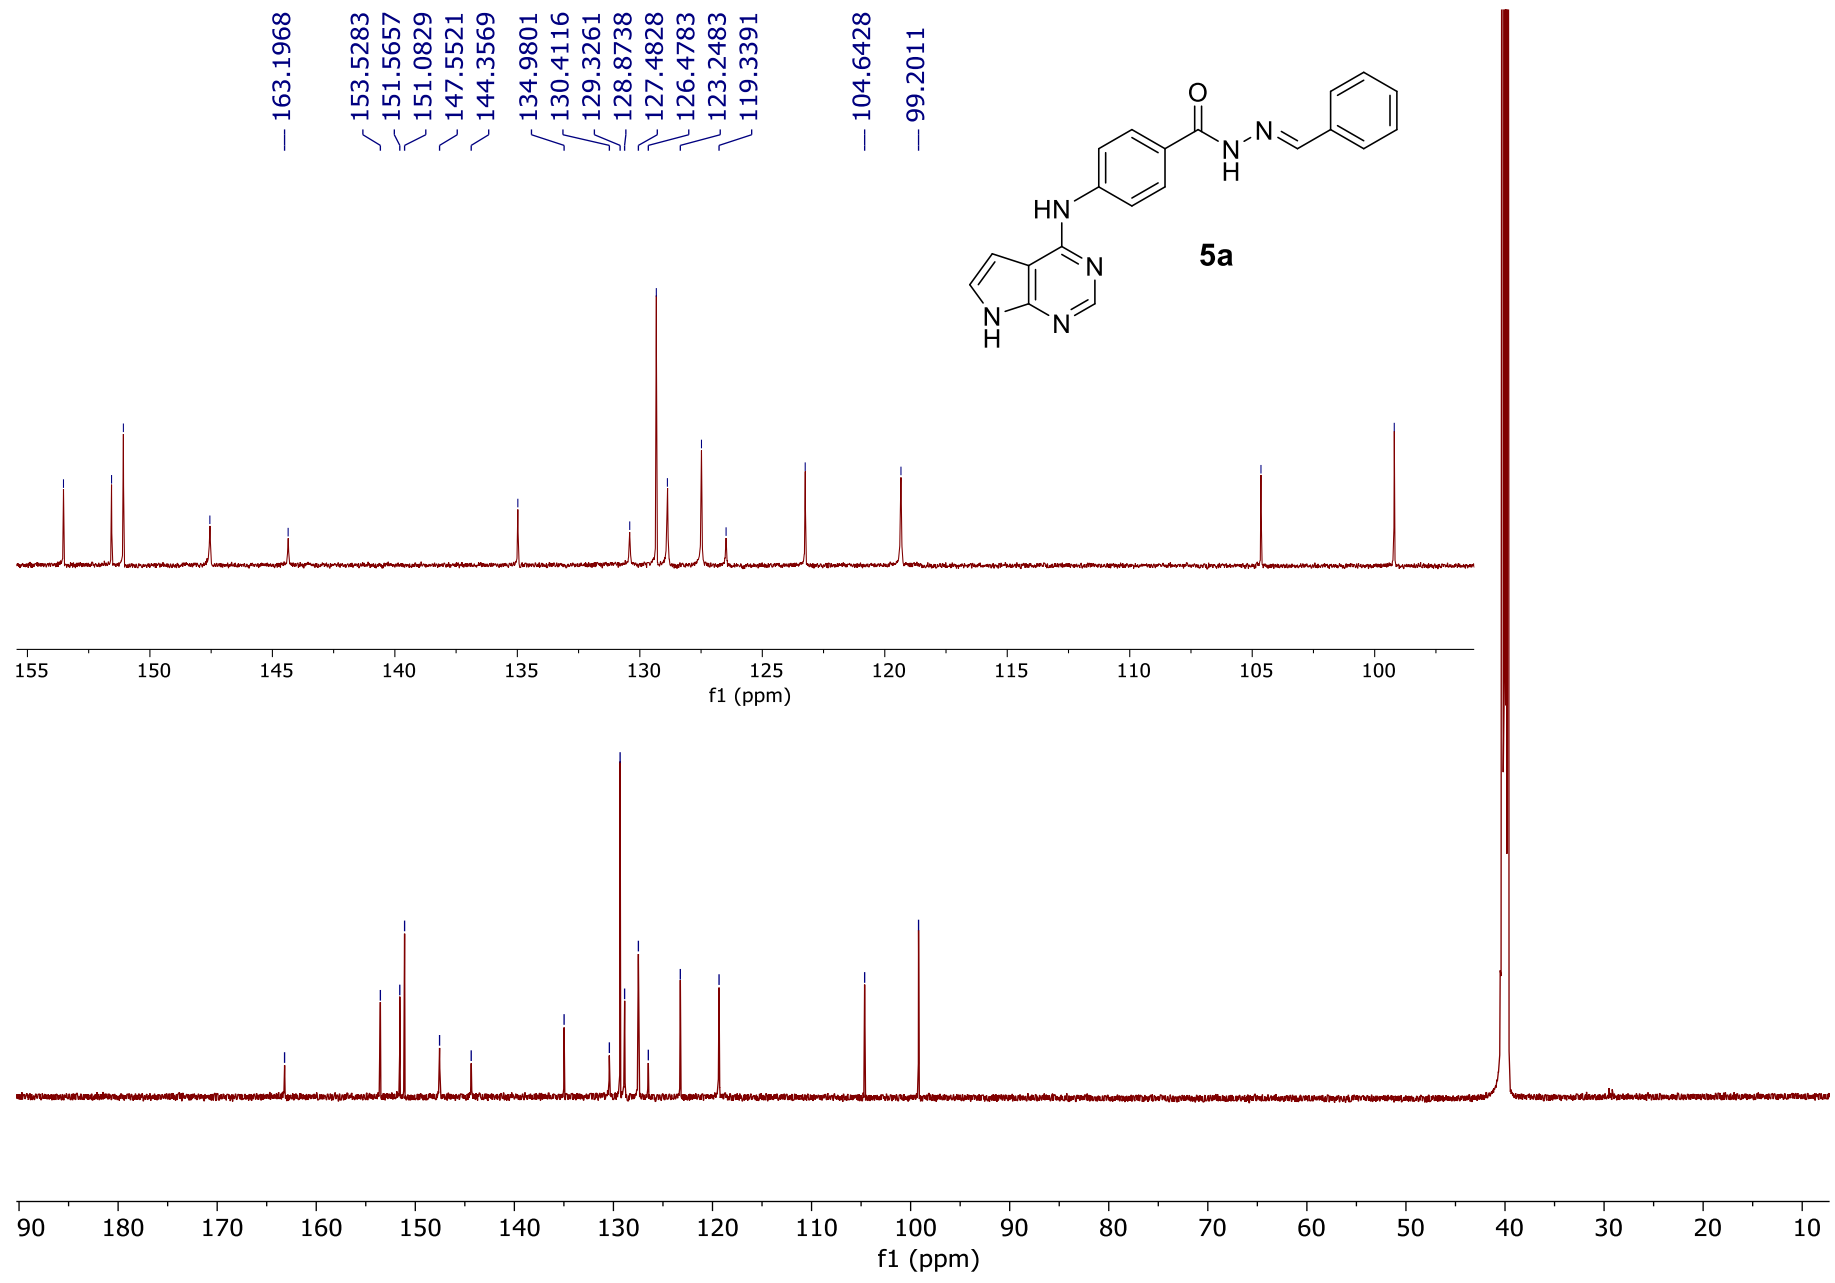

Mass spectra of **5a**

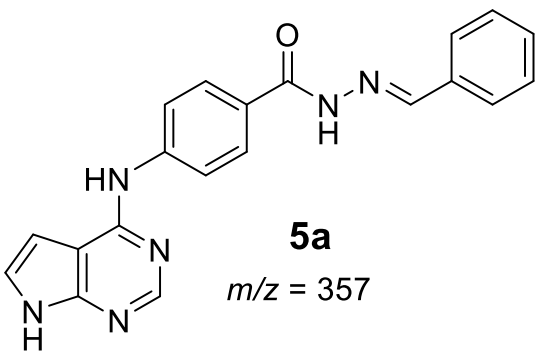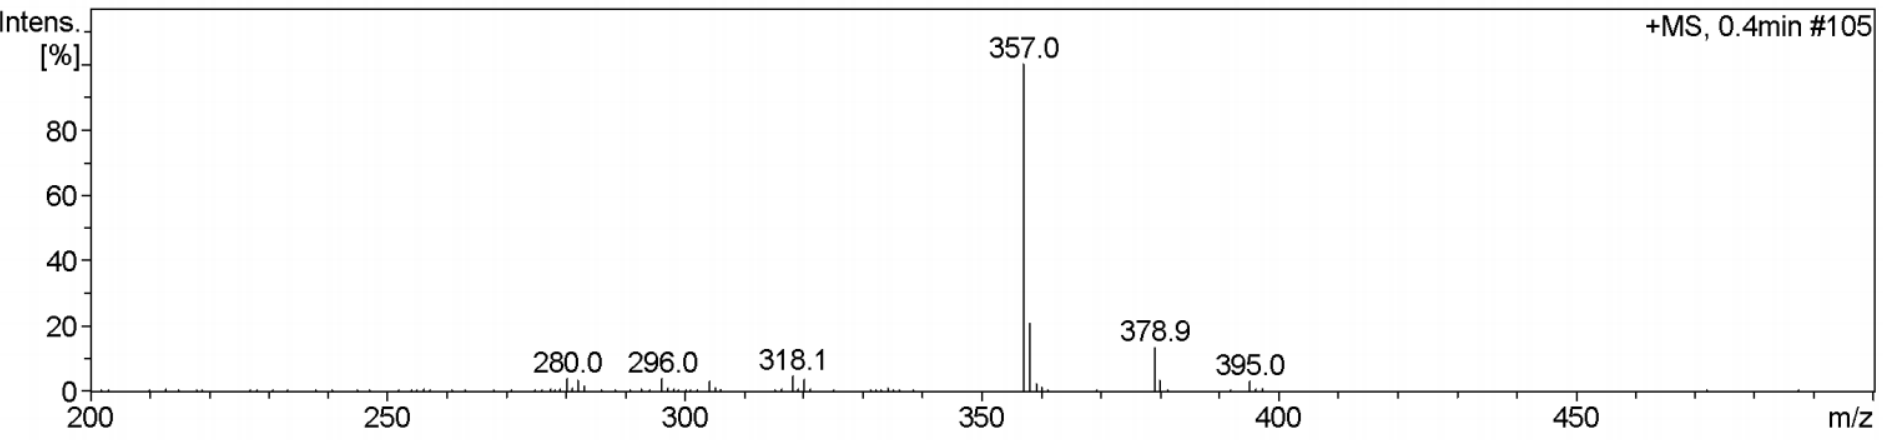

HMRS Mass spectra of **5a**

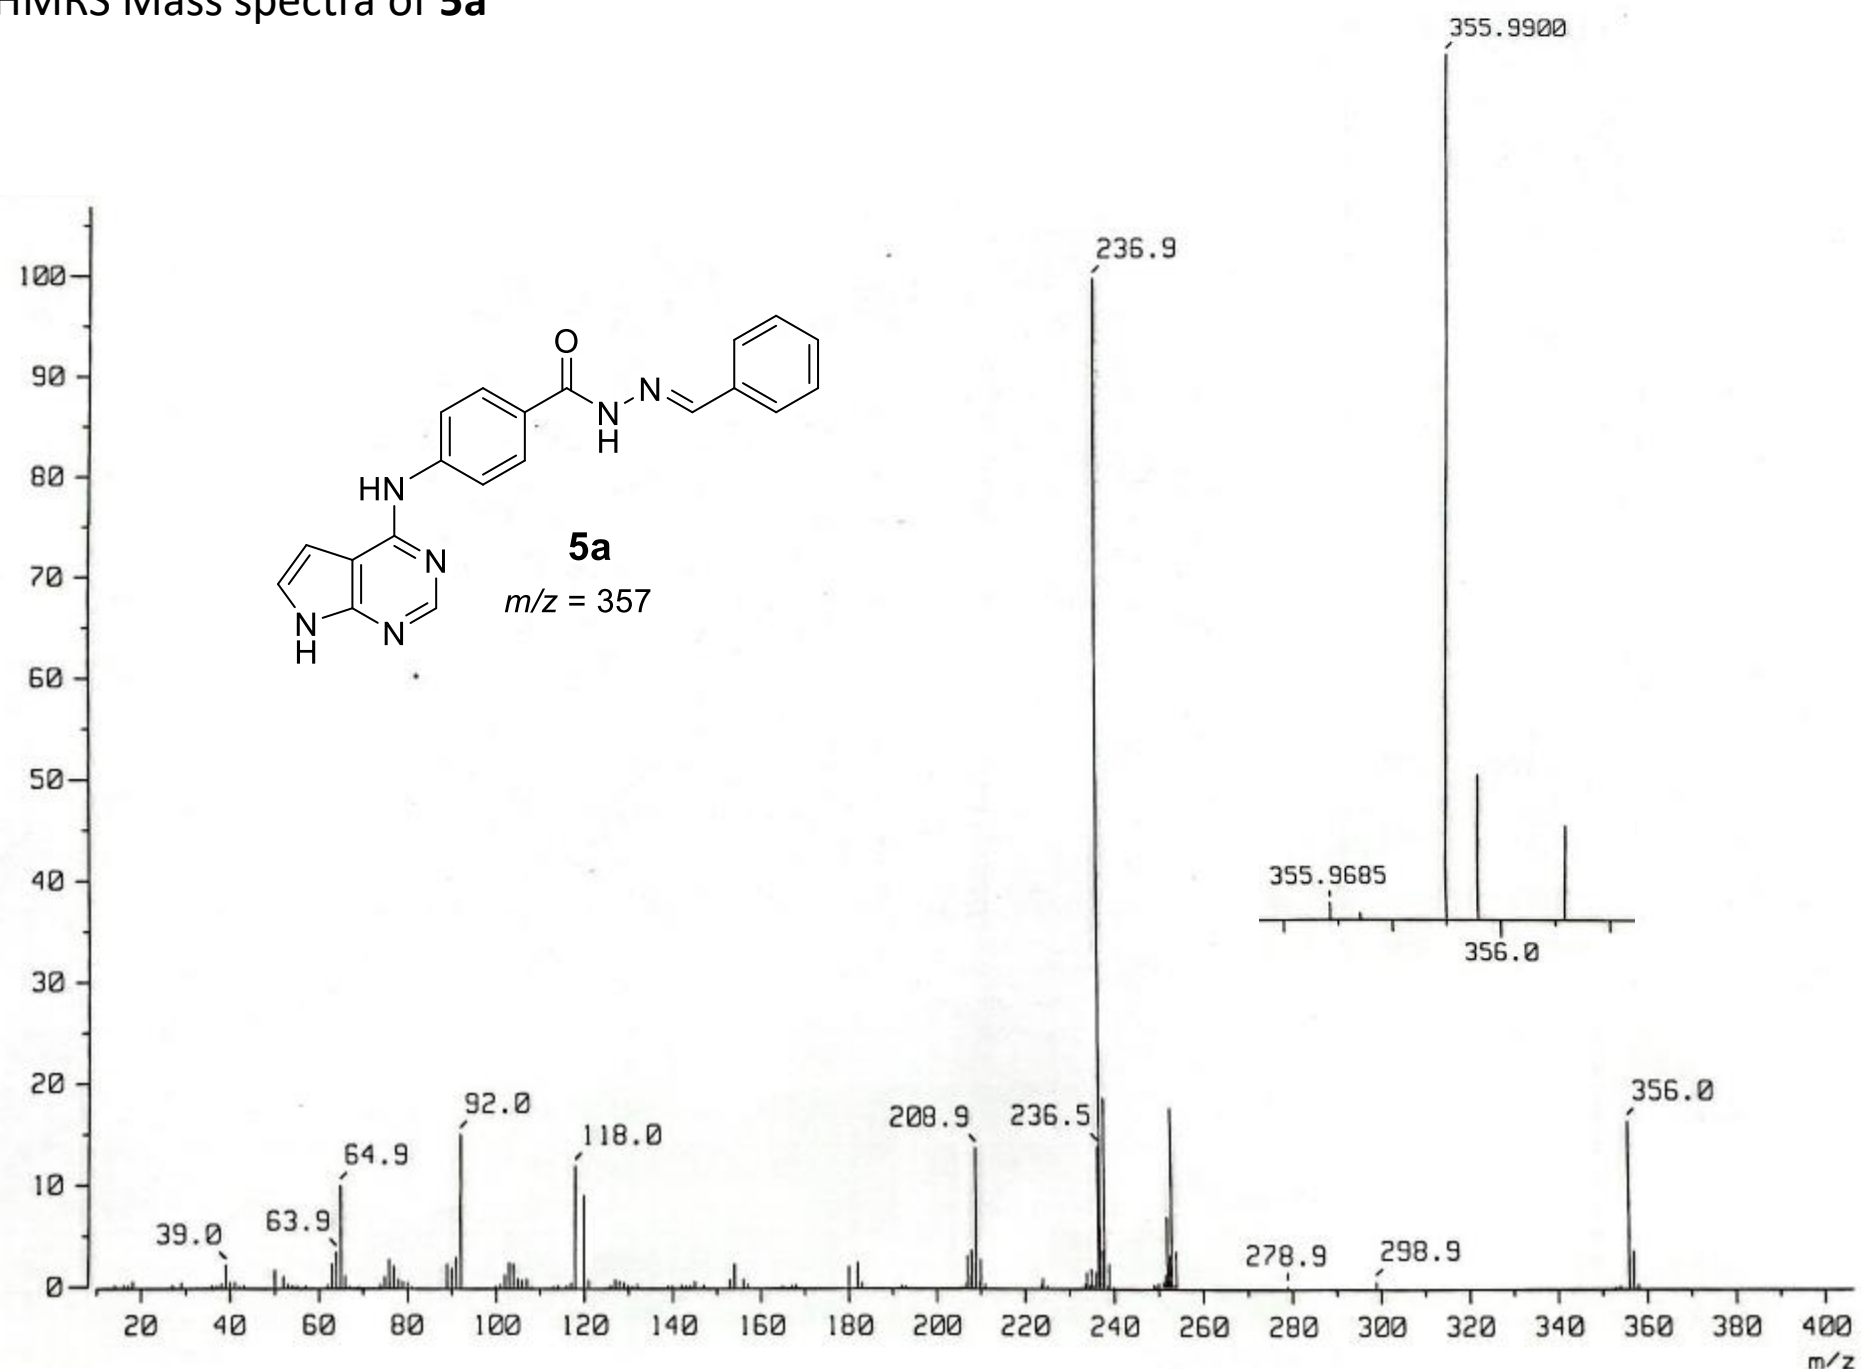



# $^1\text{H}$ -NMR spectra of **5b**

5-b

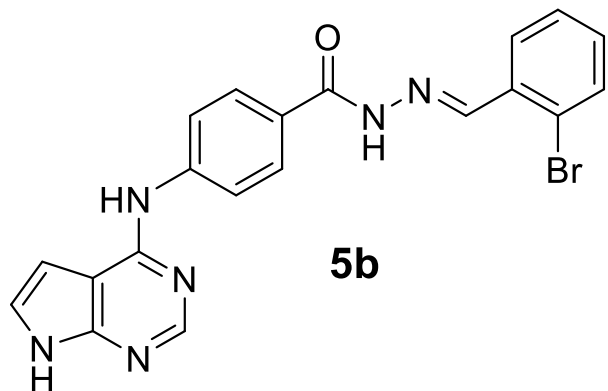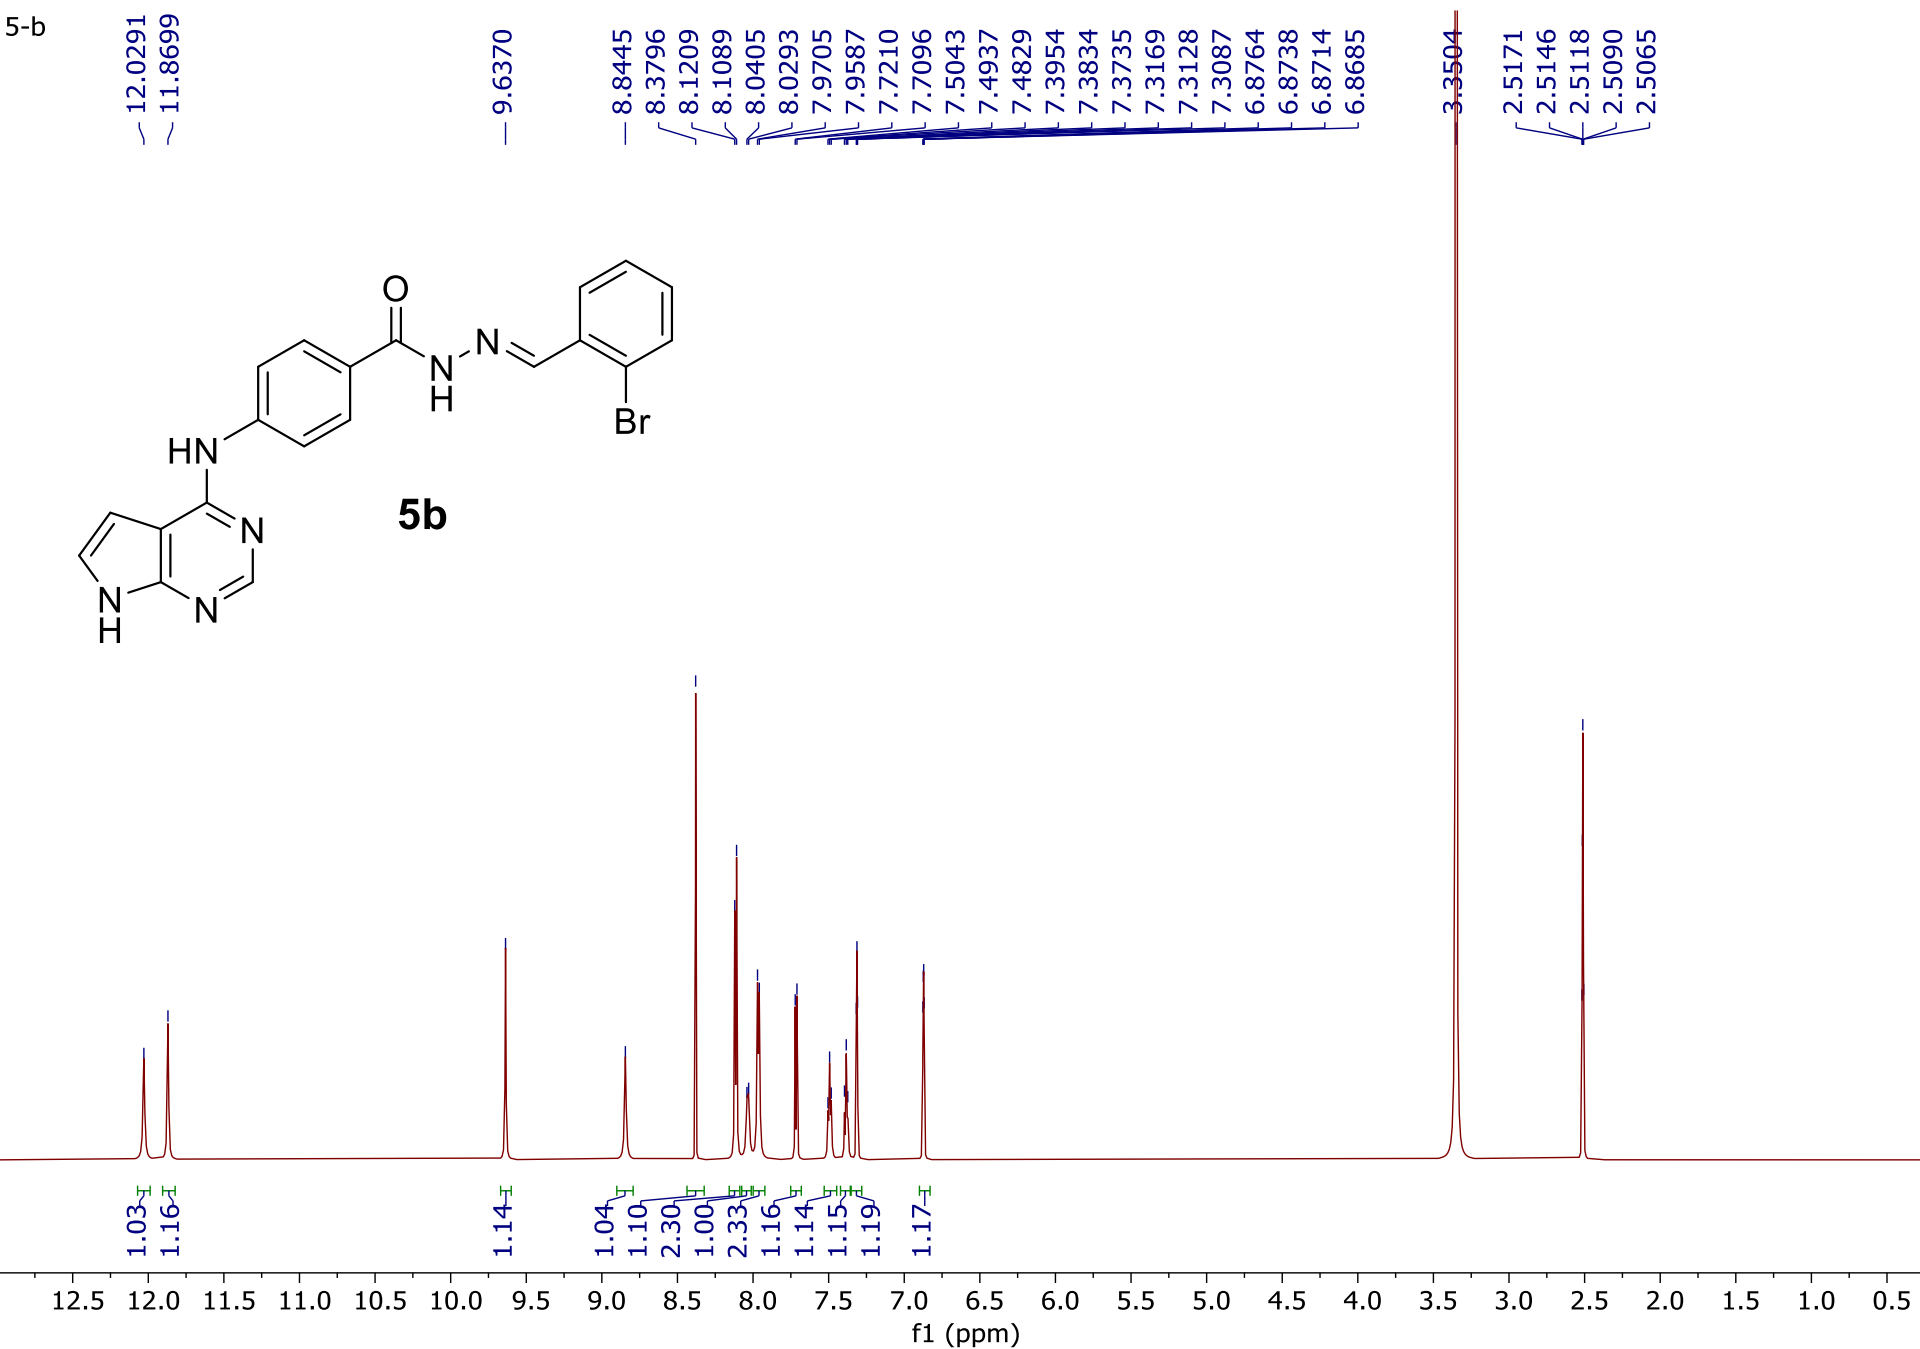

<sup>13</sup>C-NMR spectra of **5b**

5-b

— 163.2432  
— 153.5020  
— 151.5670  
— 151.0711  
— 145.7265  
— 144.5198  
— 133.7285  
— 133.6432  
— 132.0773  
— 128.9731  
— 128.5938  
— 127.7044  
— 126.1569  
— 123.9441  
— 123.2765  
— 119.3058  
  
— 104.6610  
— 99.1959

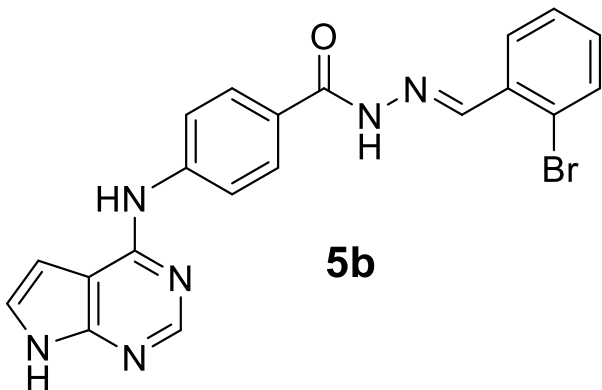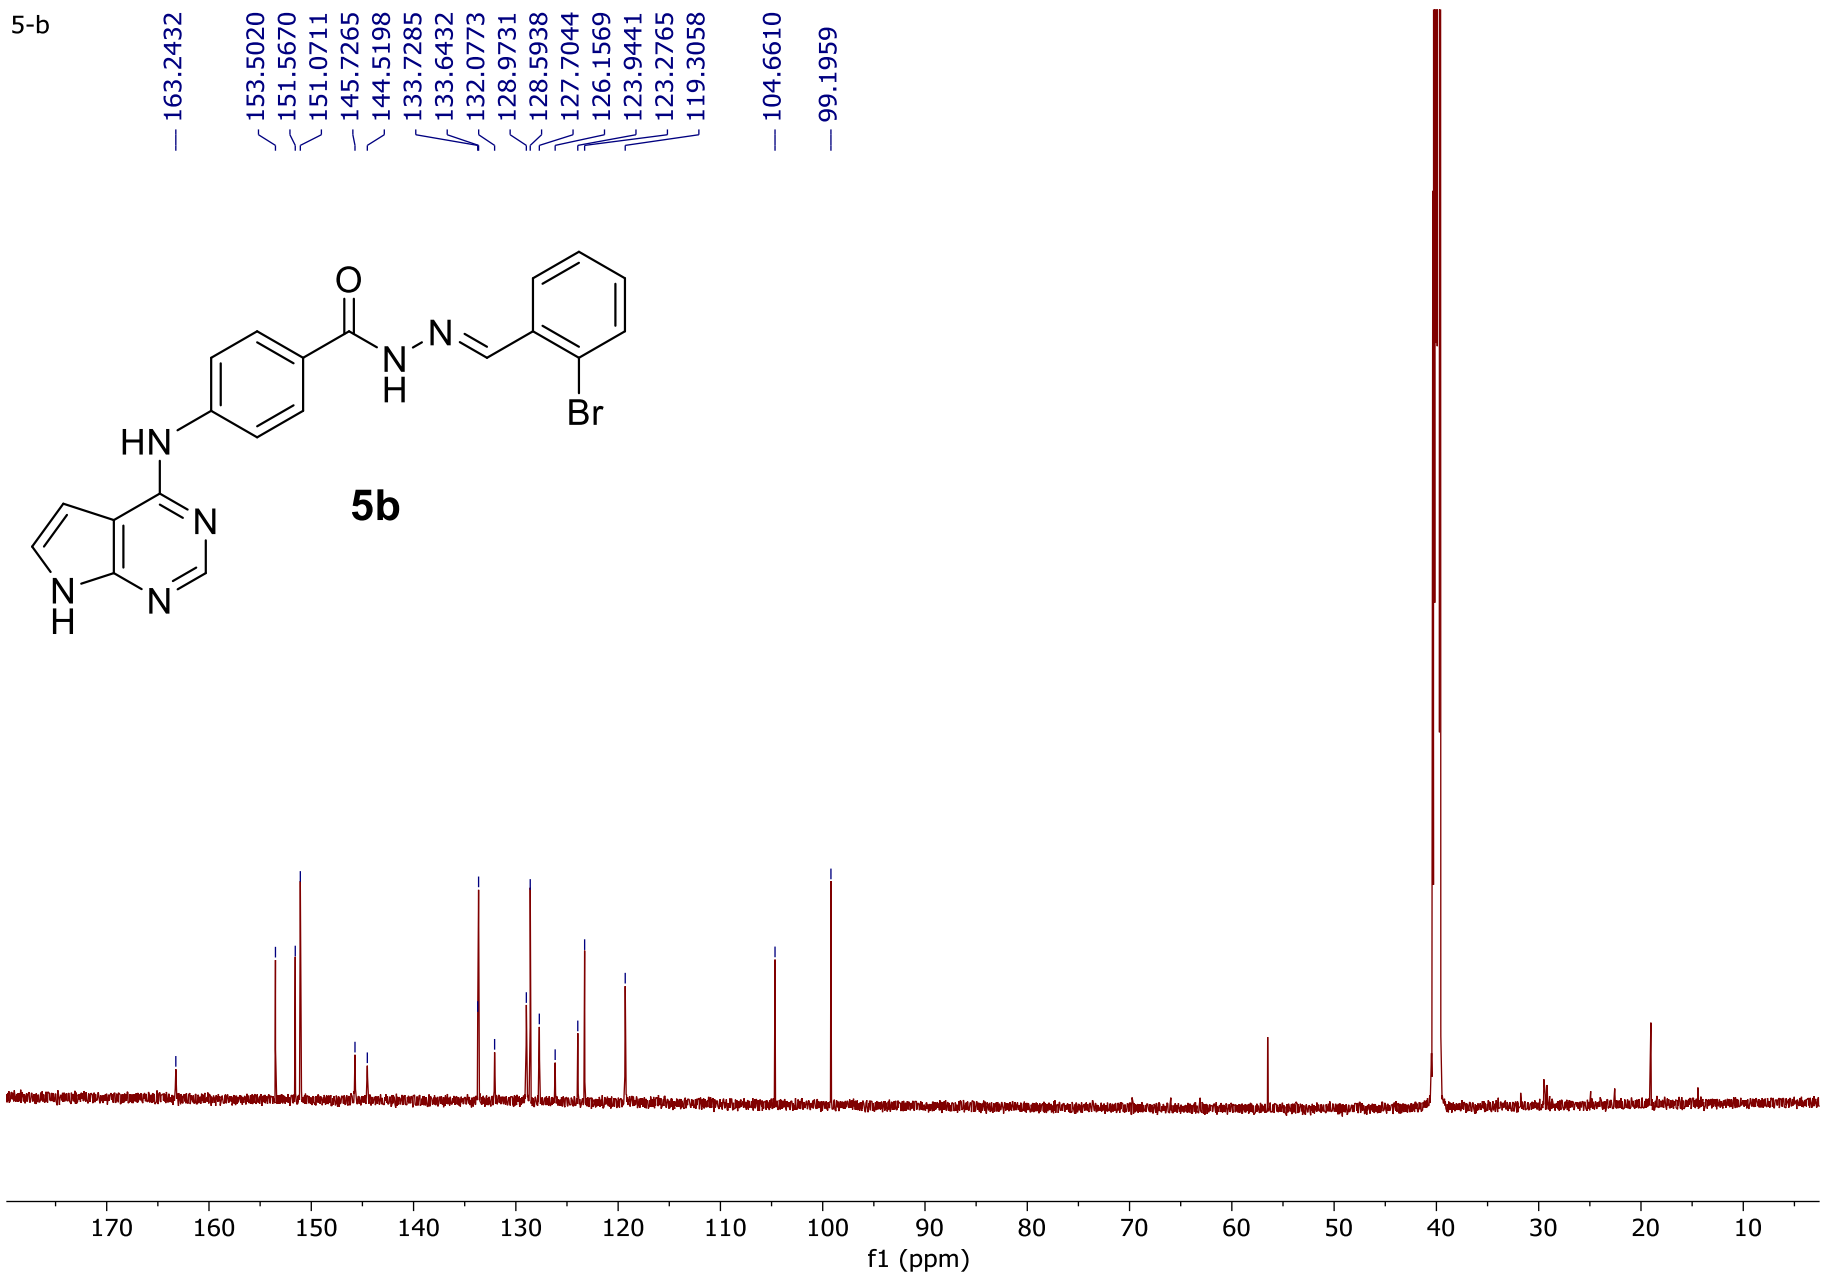

Mass spectra of **5b**

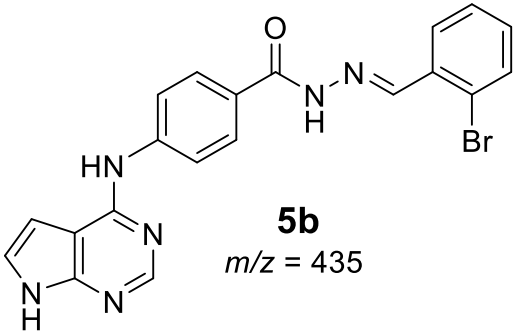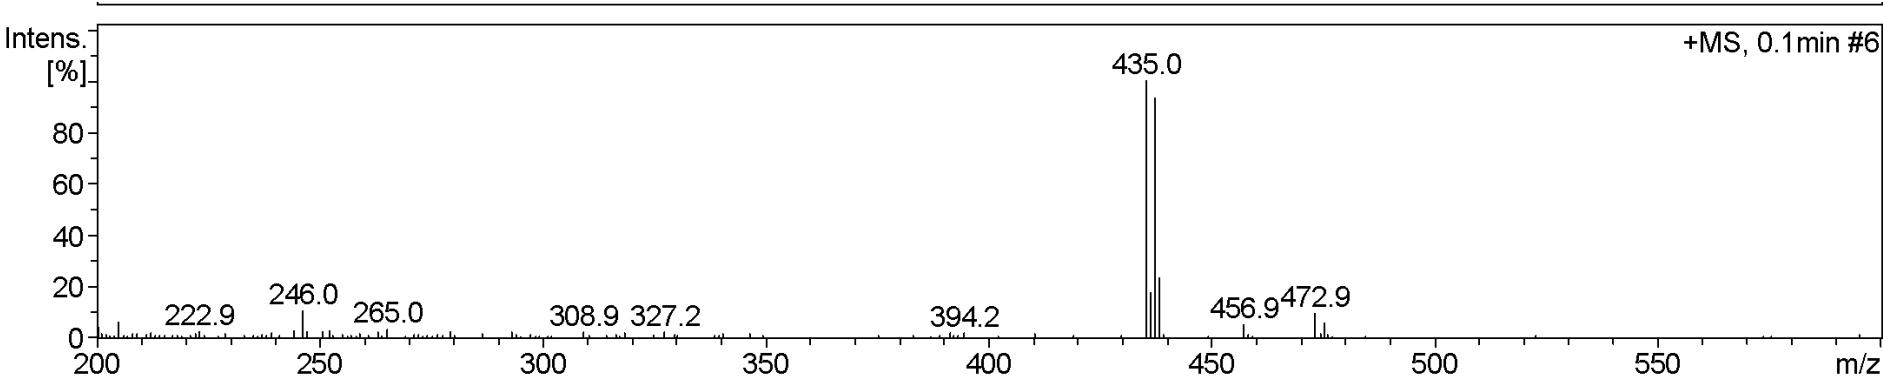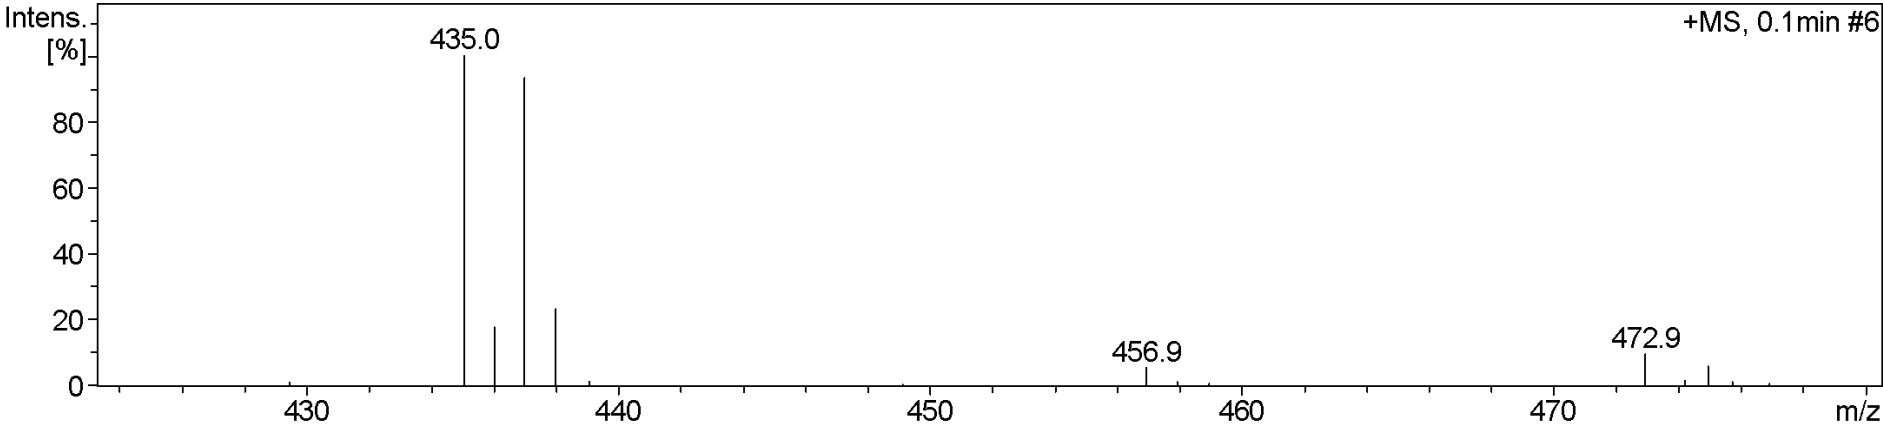

HMRS Mass spectra of **5b**

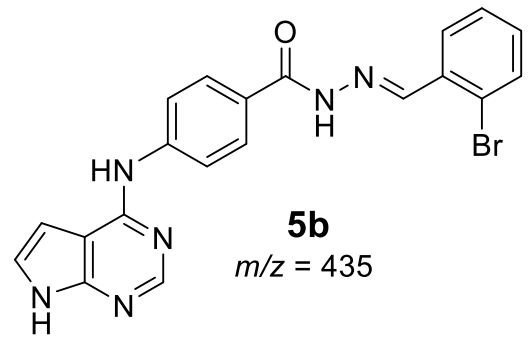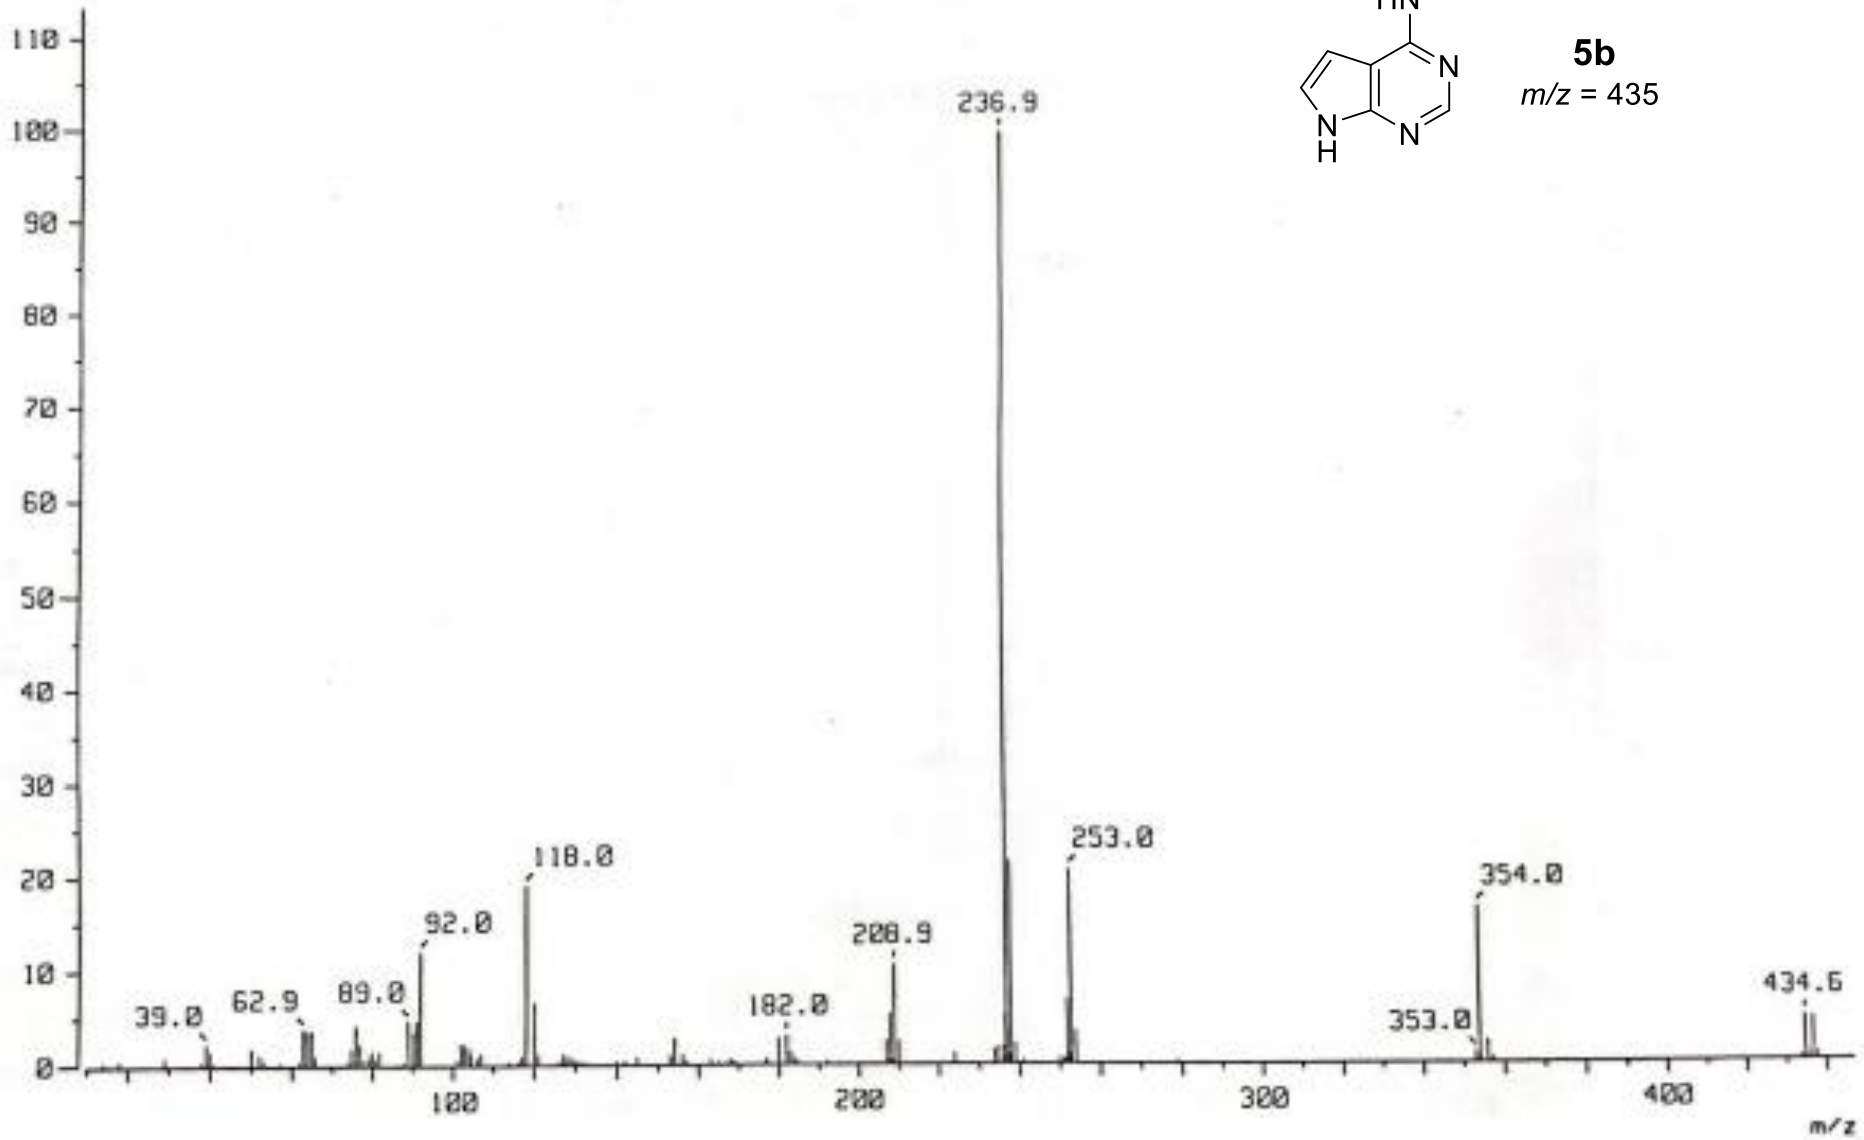

<sup>1</sup>H-NMR spectra of **5c**

5-c

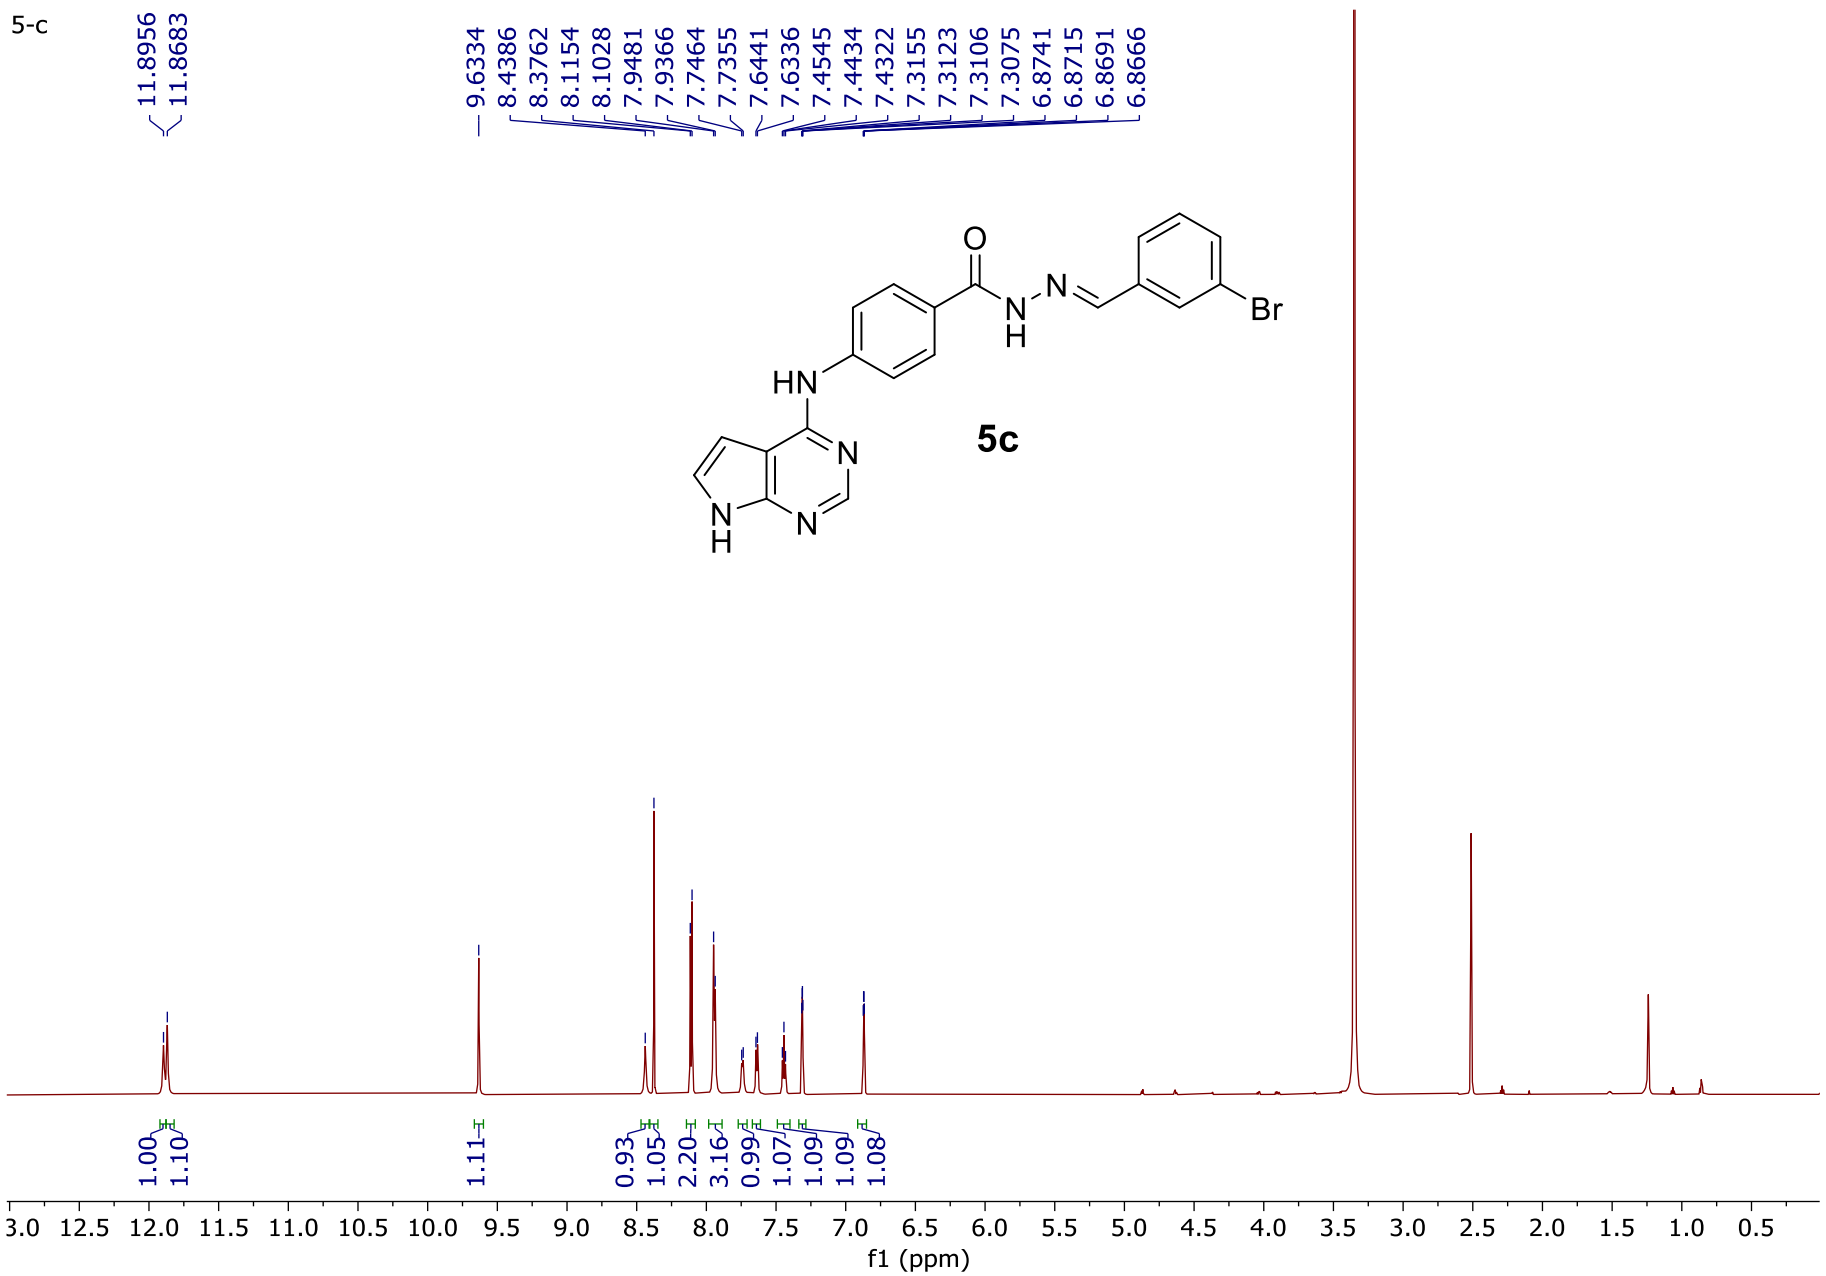

<sup>13</sup>C-NMR spectra of **5c**

5-c

- 163.3117
- 153.5056
- 151.5645
- 151.0675
- 145.6805
- 144.4793
- 137.4766
- 132.9036
- 131.5124
- 129.4777
- 128.9488
- 126.6436
- 126.2419
- 123.2724
- 122.6628
- 119.3243
- 104.6541
- 99.1959

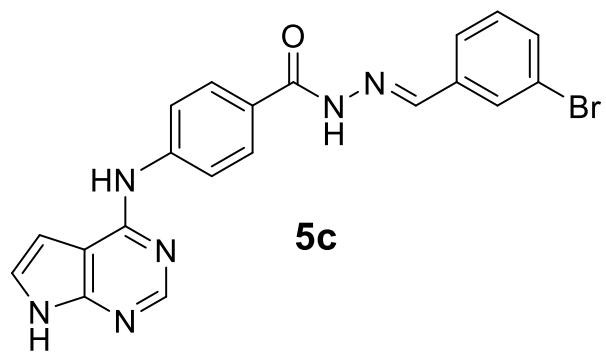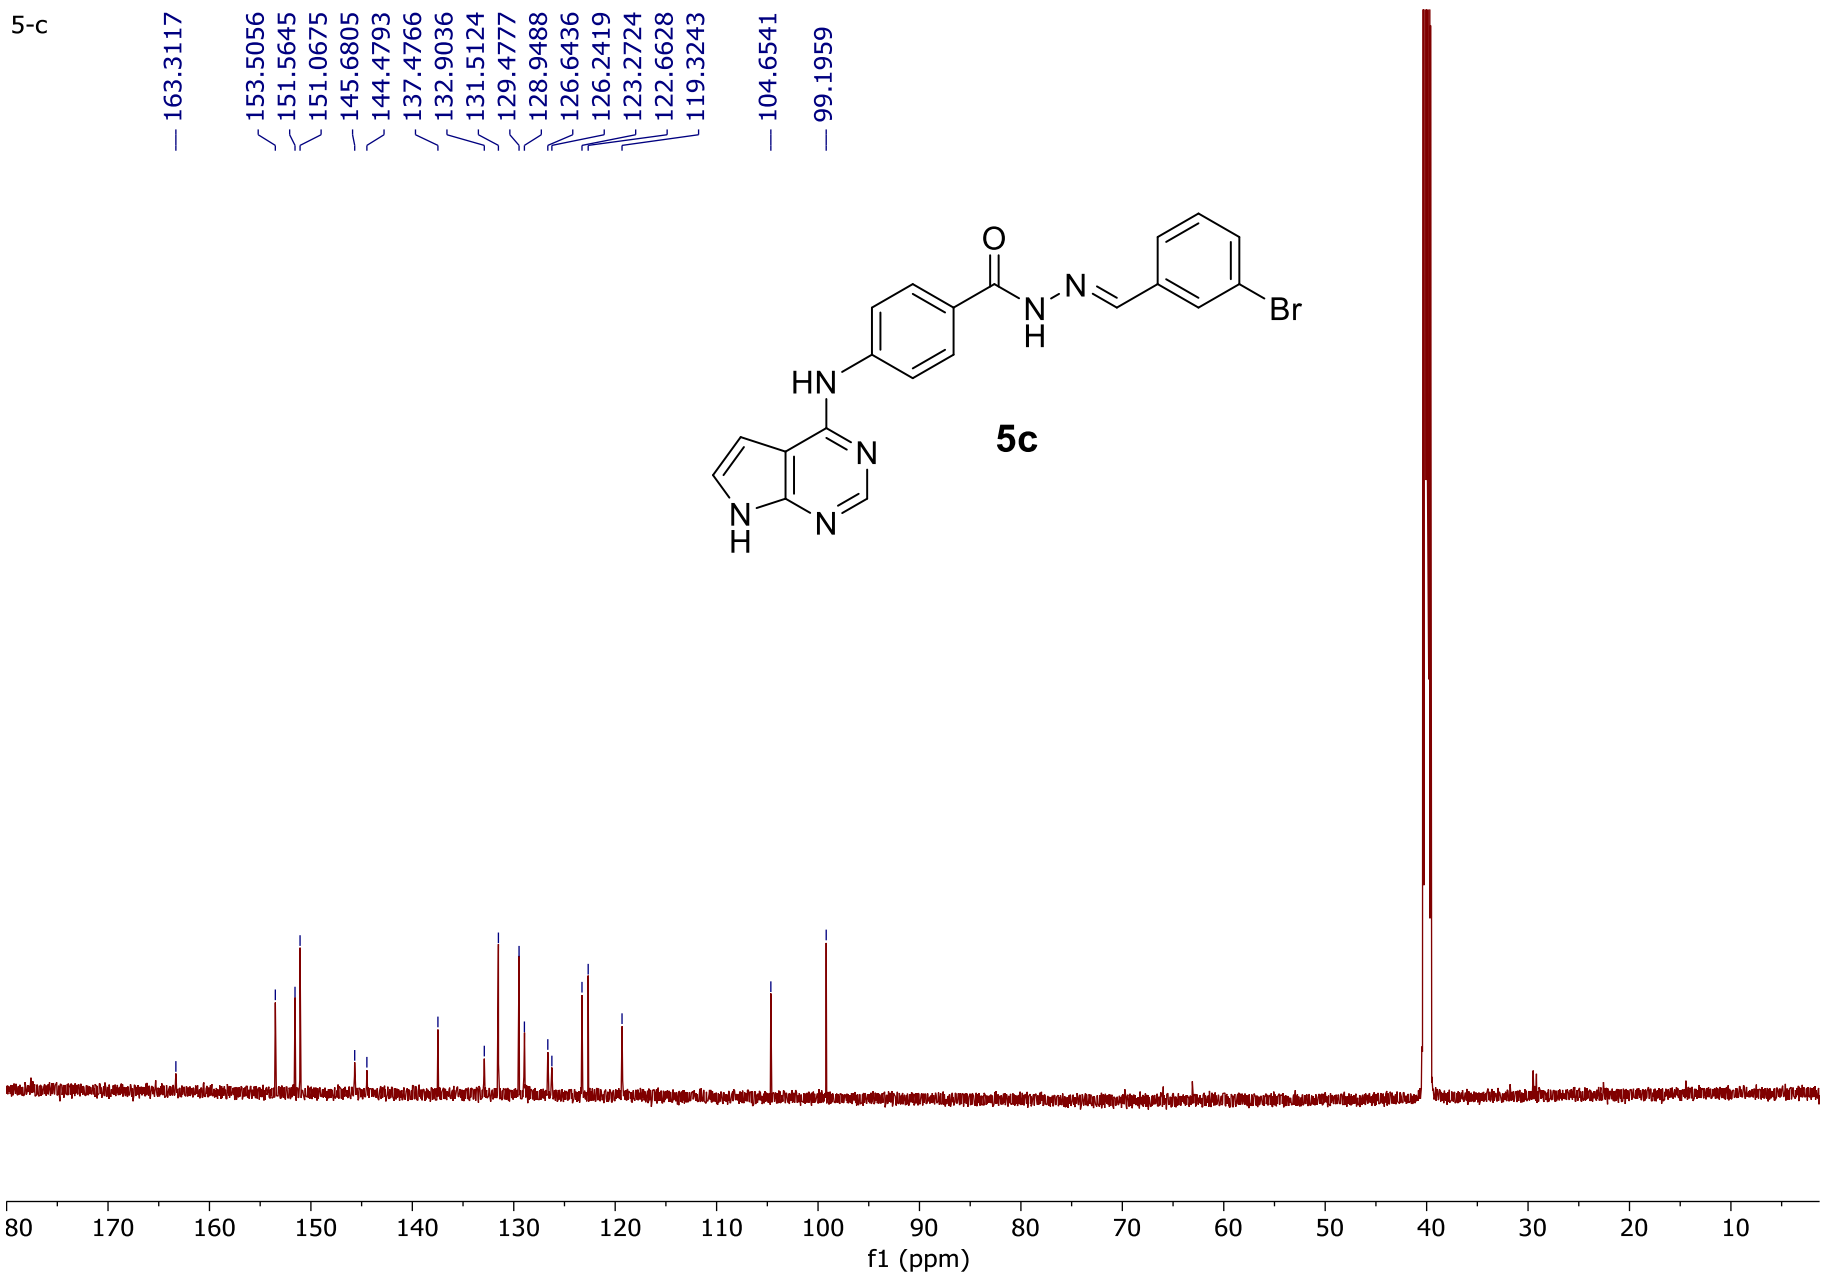

Mass spectra of **5c**

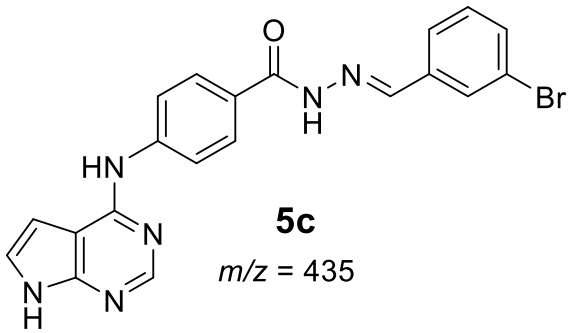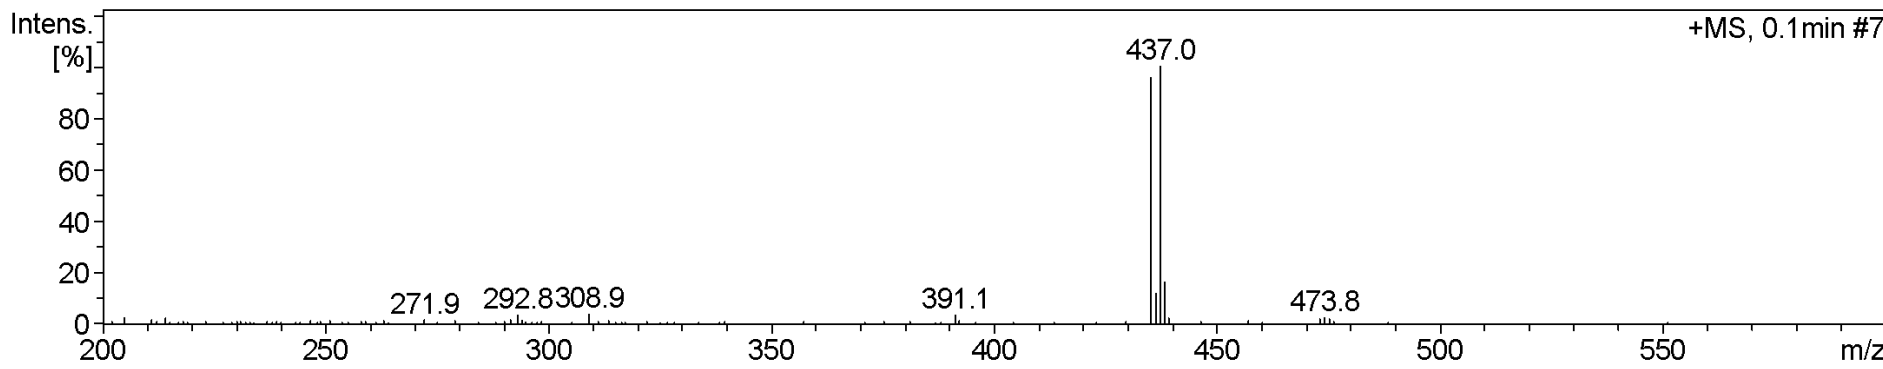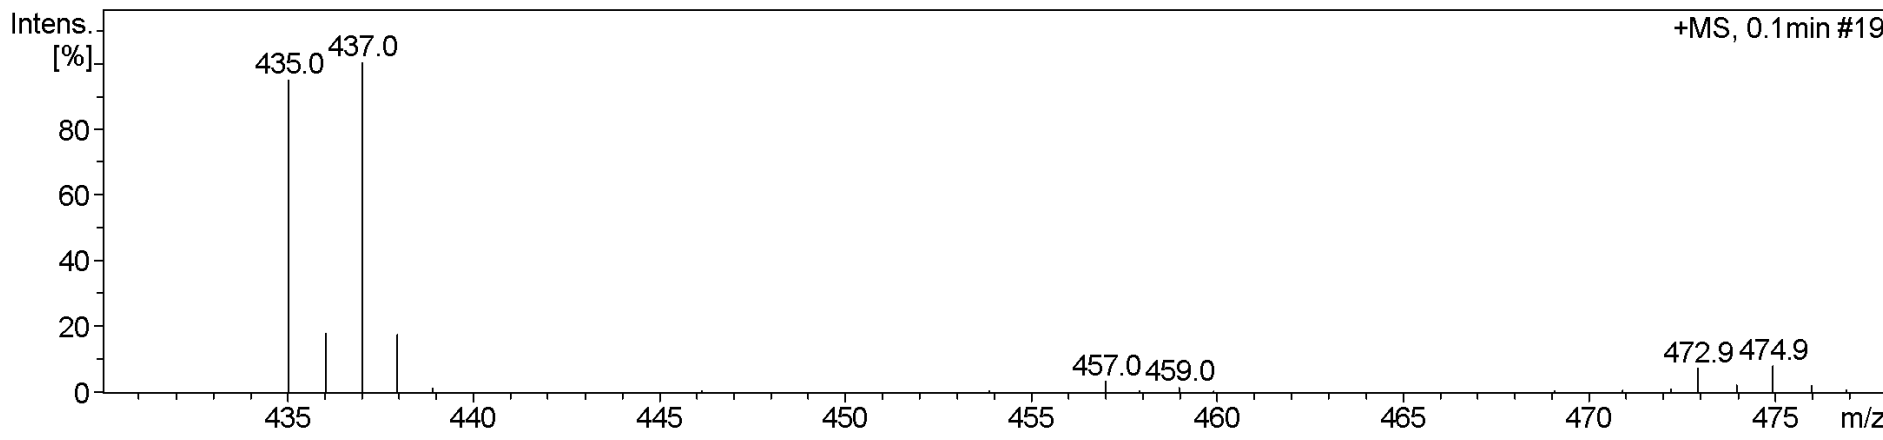

HMRS Mass spectra of **5c**

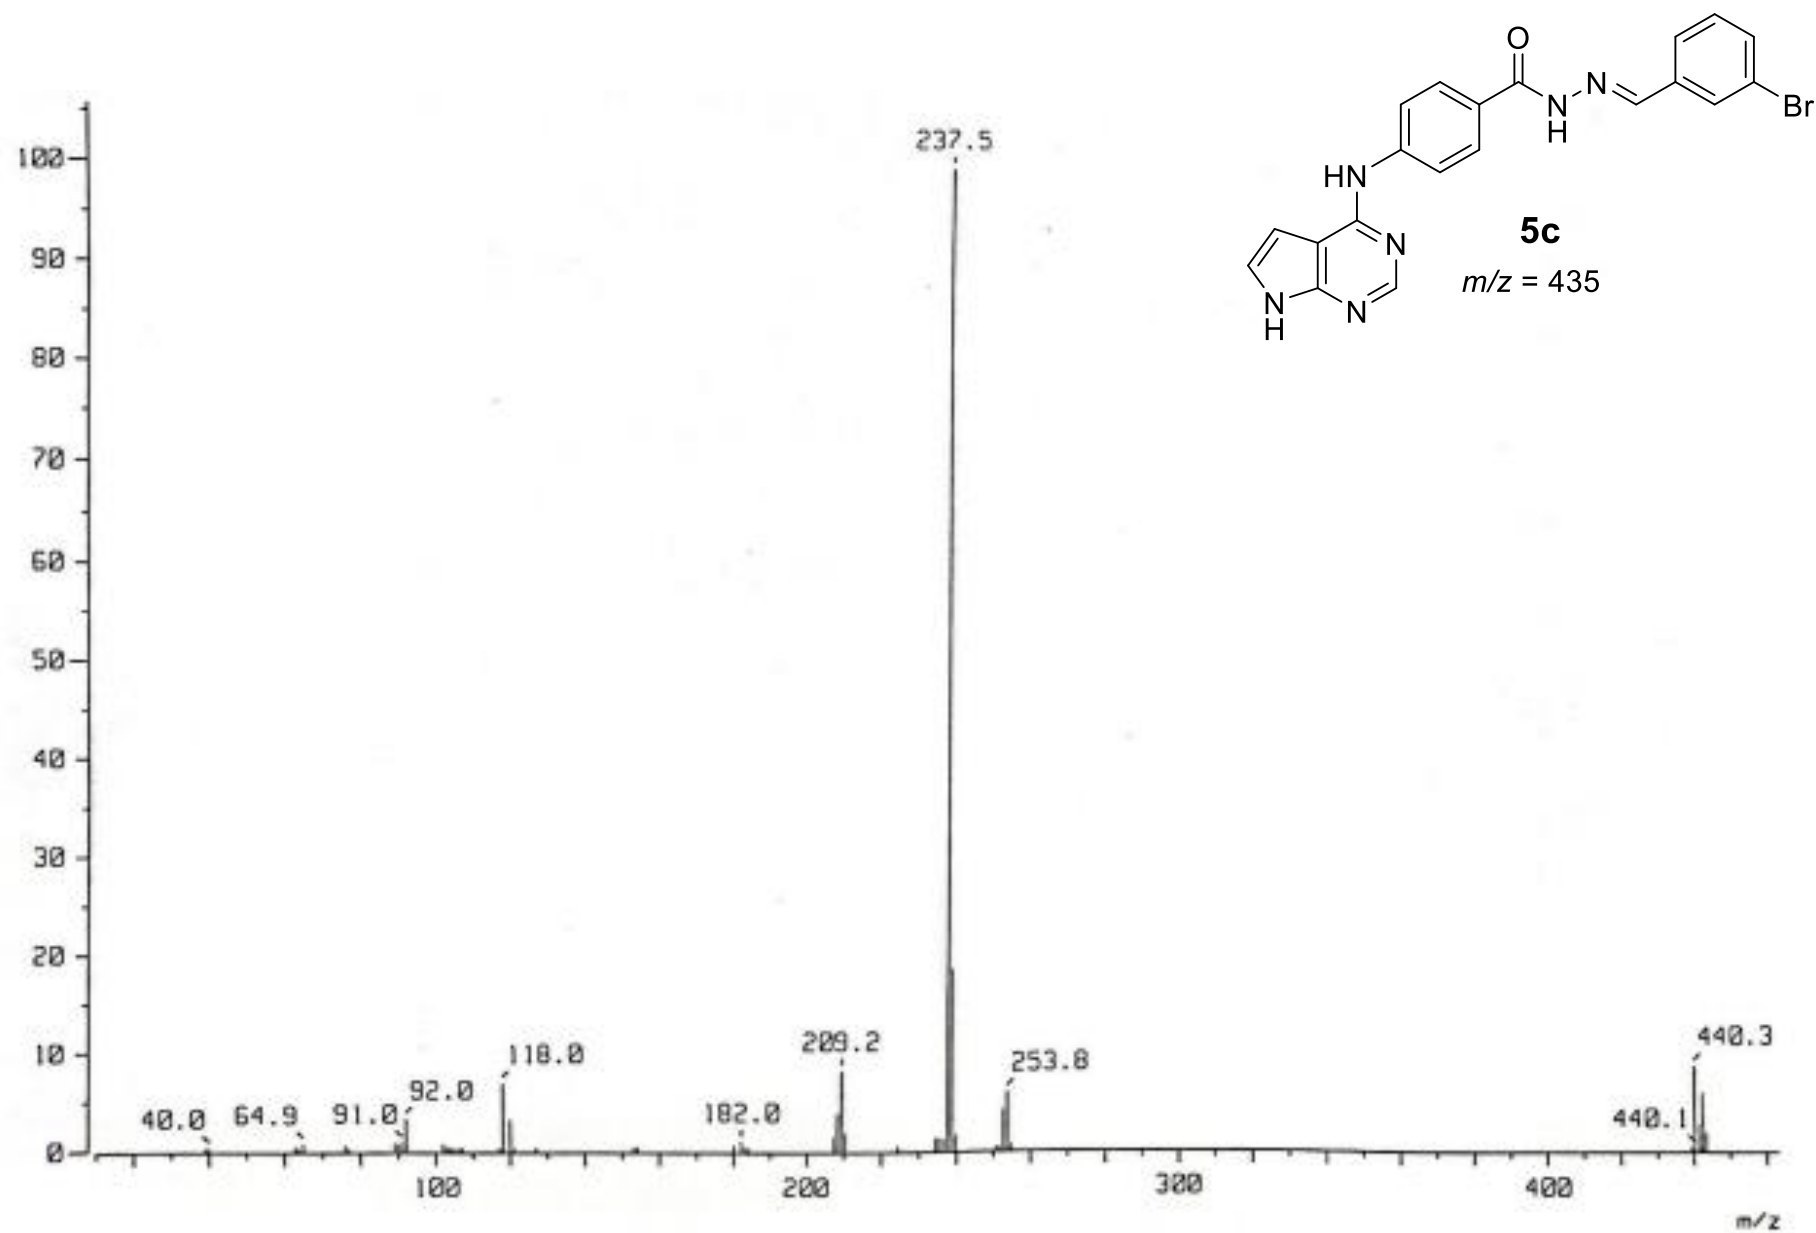



<sup>1</sup>H-NMR spectra of **5d**

5-d

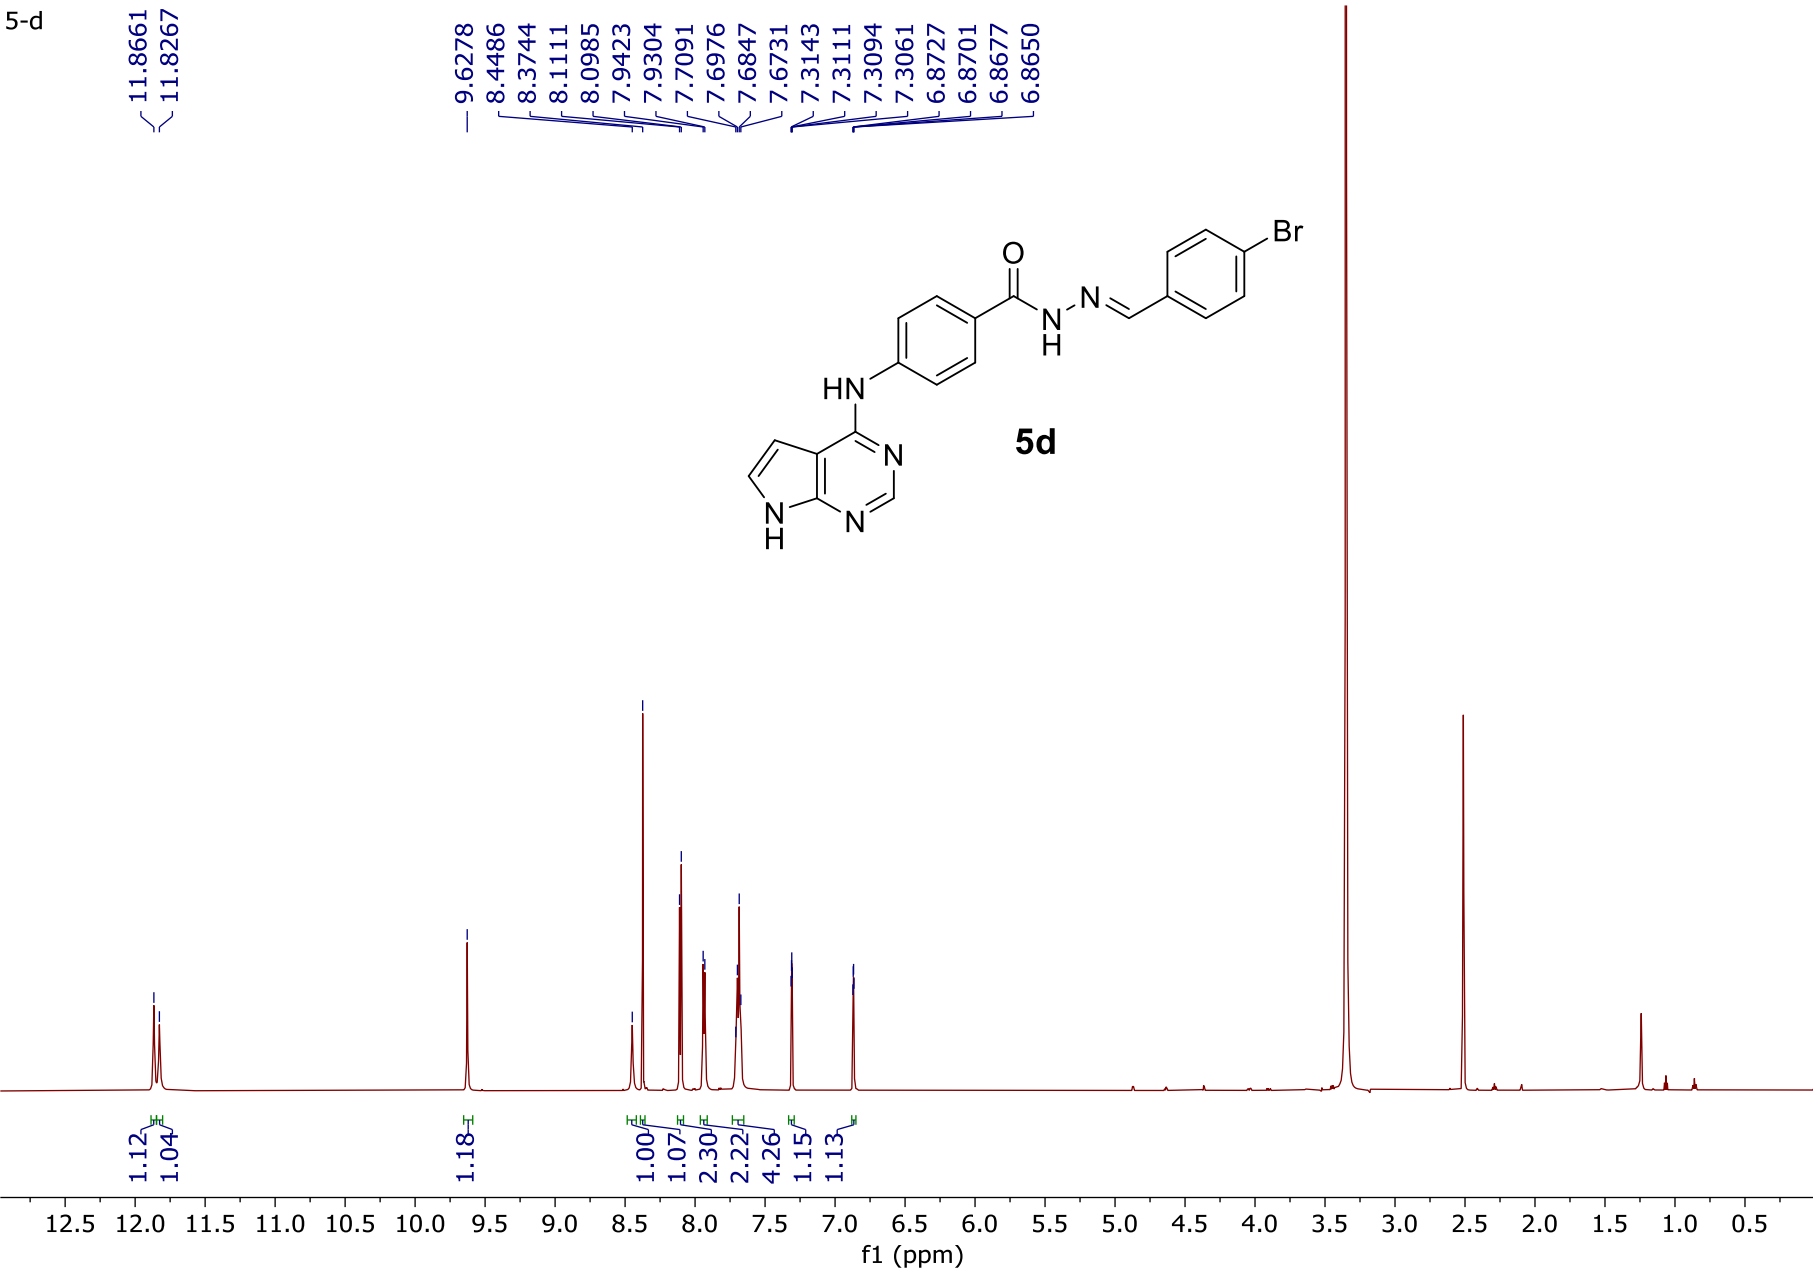

<sup>13</sup>C-NMR spectra of **5d**

5-d

- 163.2308
- 153.5093
- 151.5592
- 151.0680
- 146.2553
- 144.4239
- 134.2755
- 132.3317
- 129.3405
- 128.9020
- 126.3340
- 123.5901
- 123.2634
- 119.3304
- 104.6444
- 99.1951

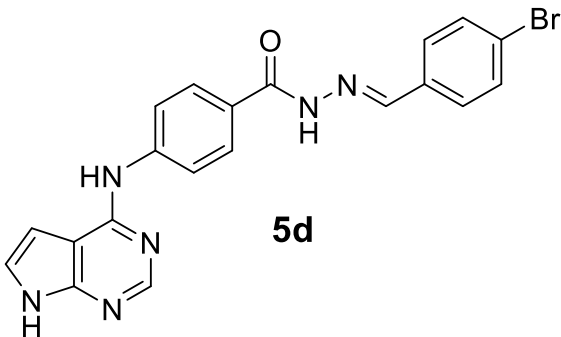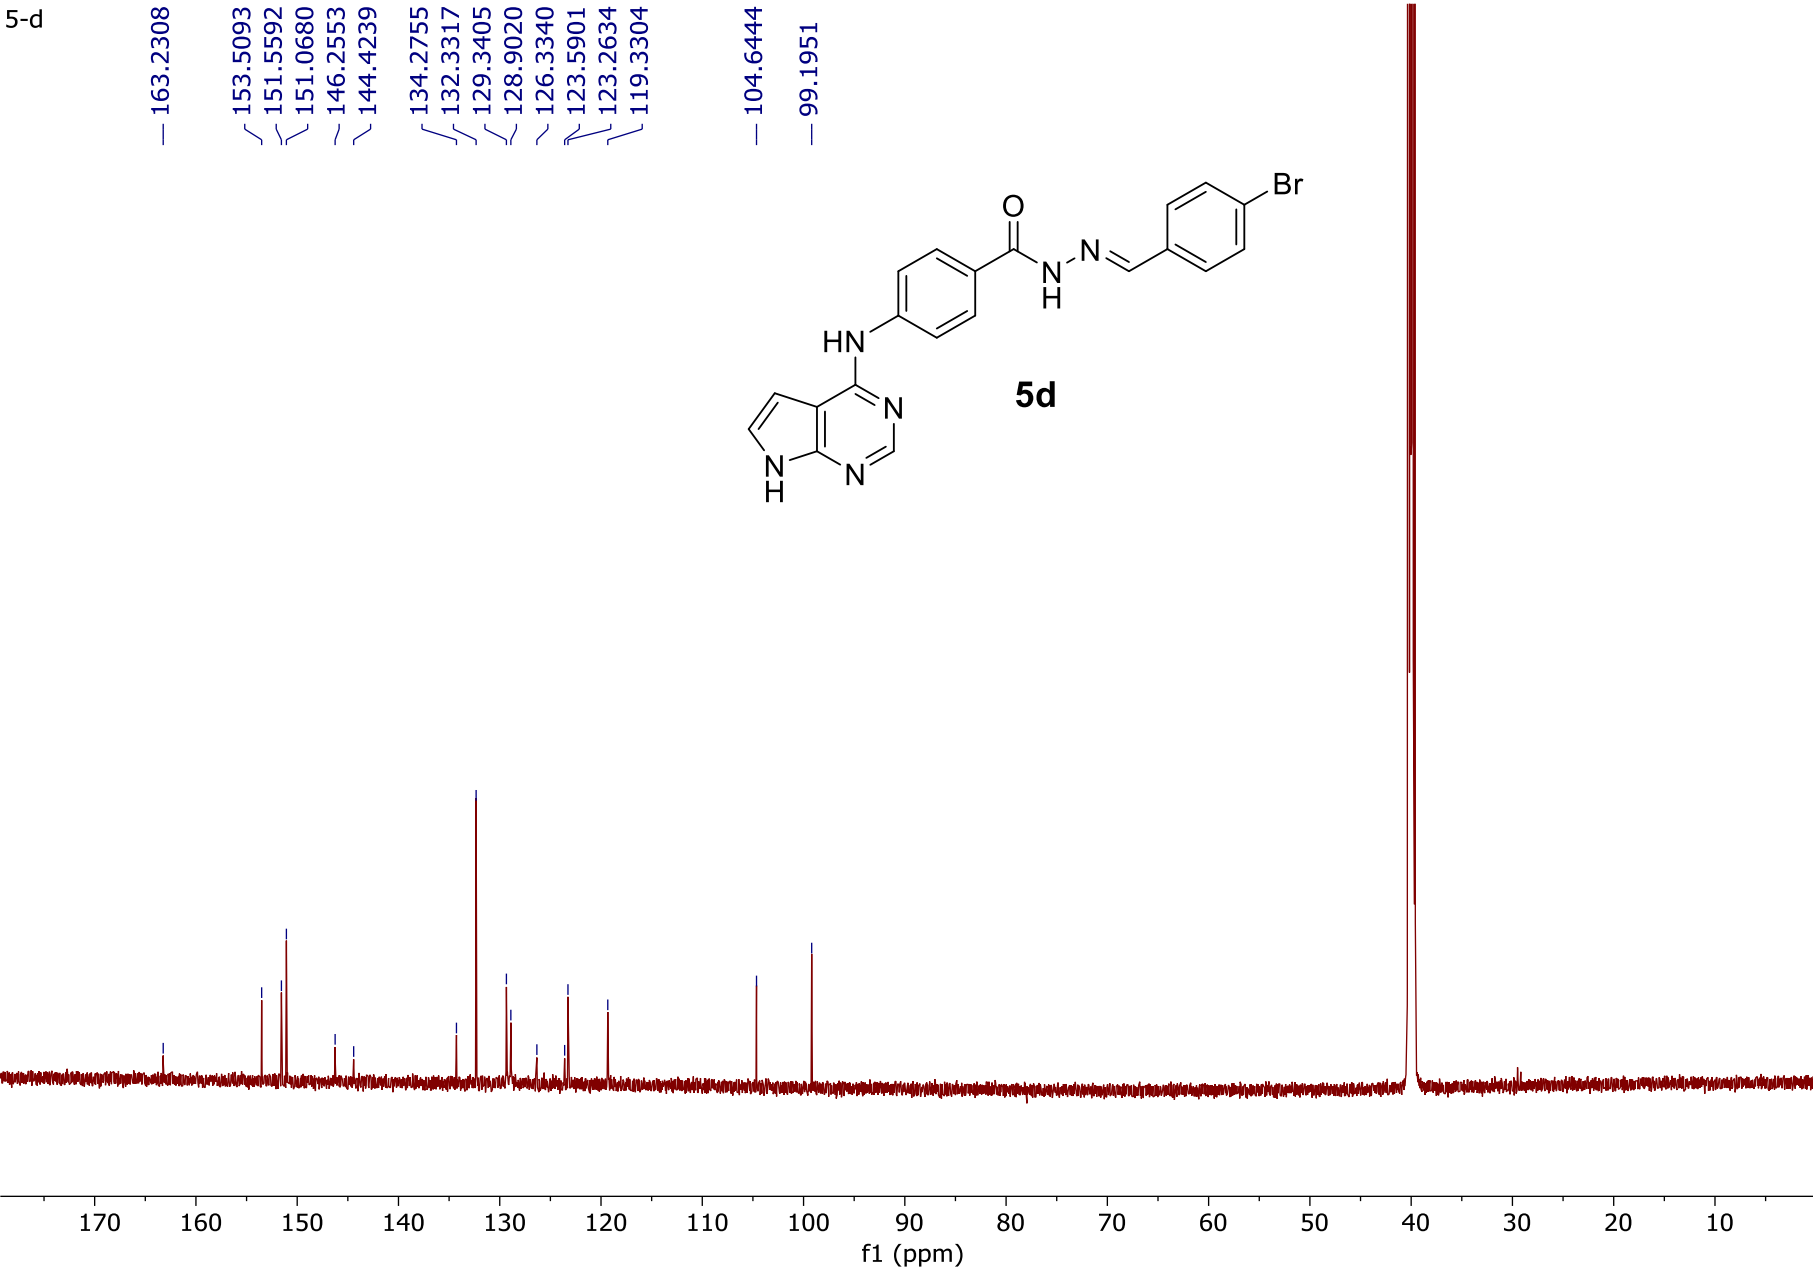

Mass spectra of **5d**

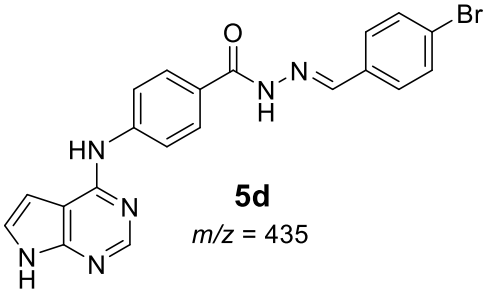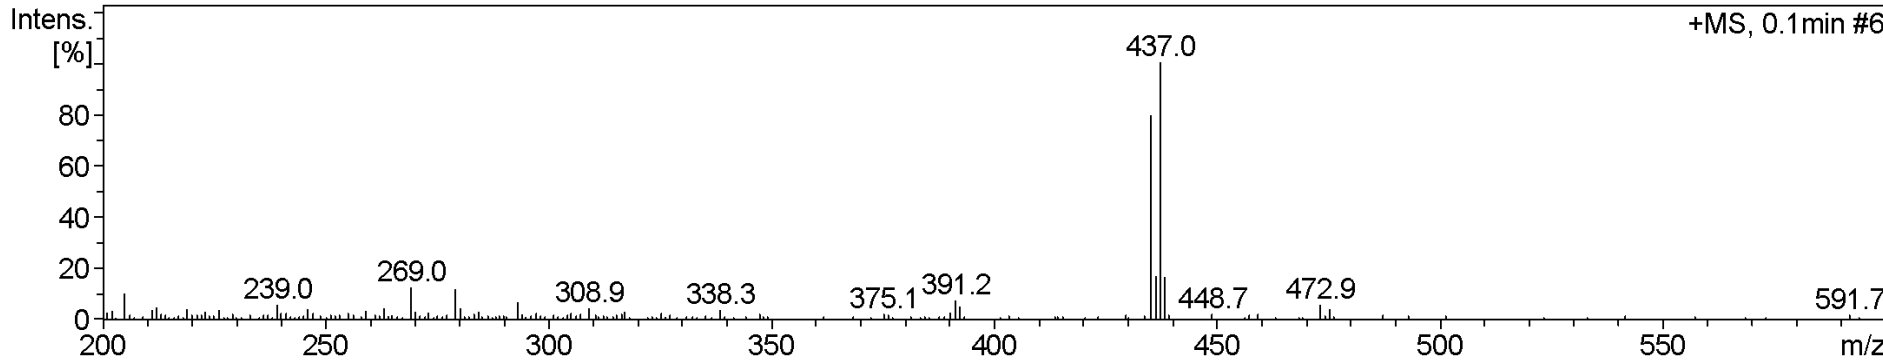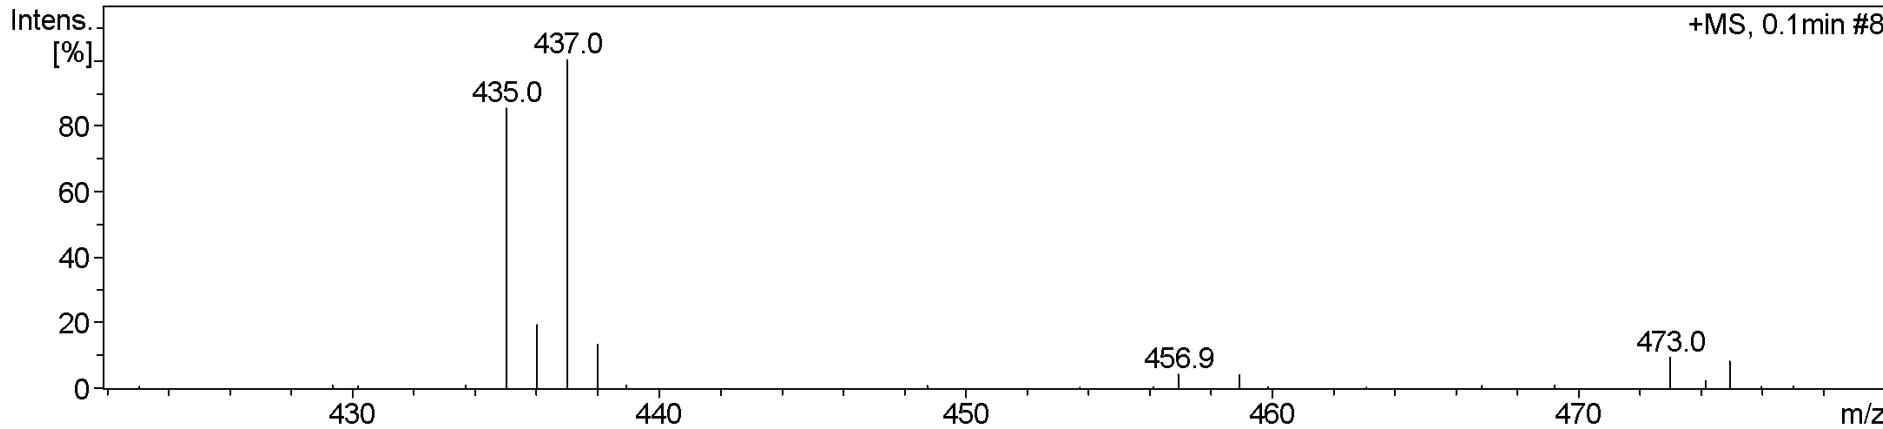

HMRS Mass spectra of **5d**

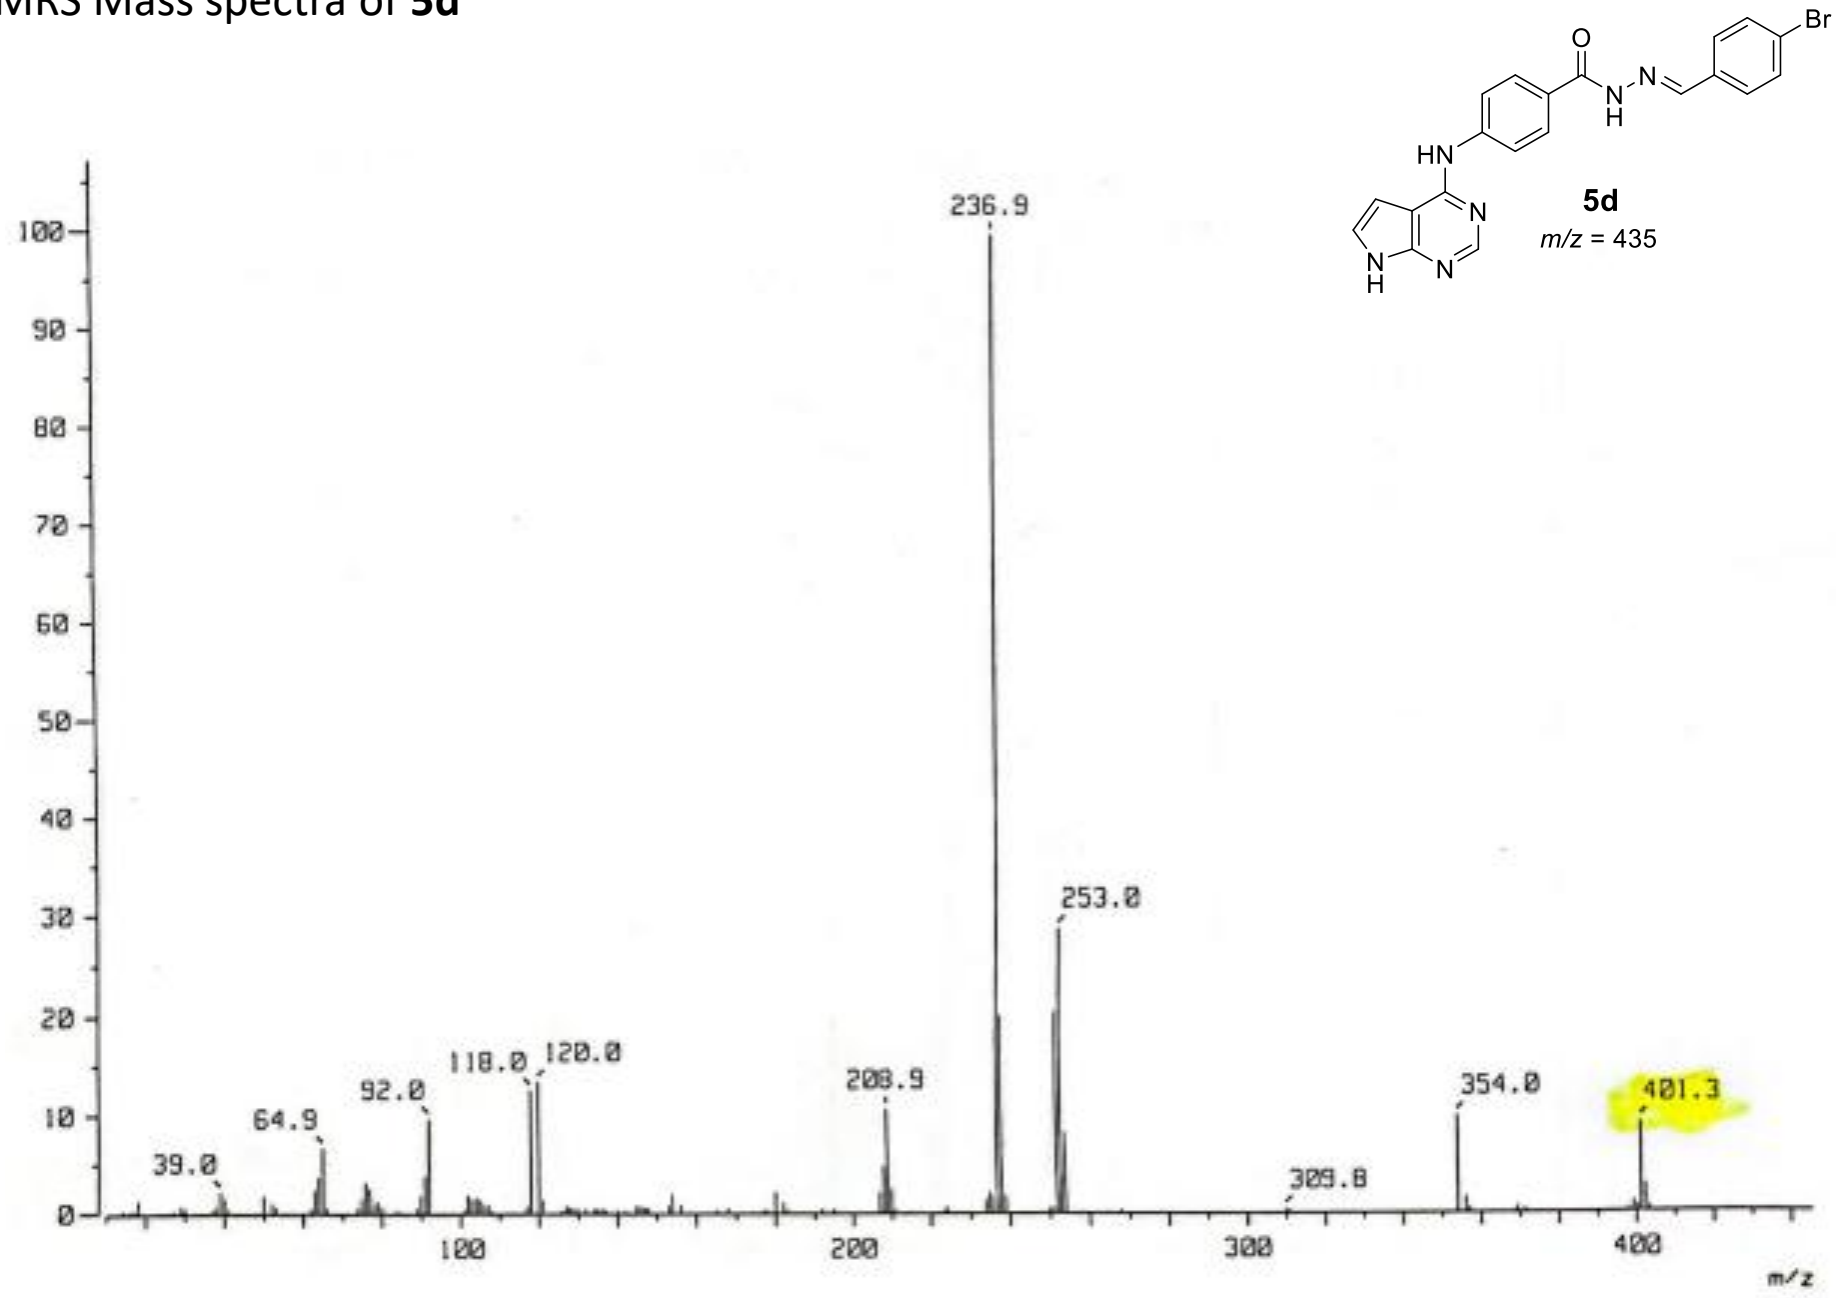

<sup>1</sup>H-NMR spectra of **5e**

5-e

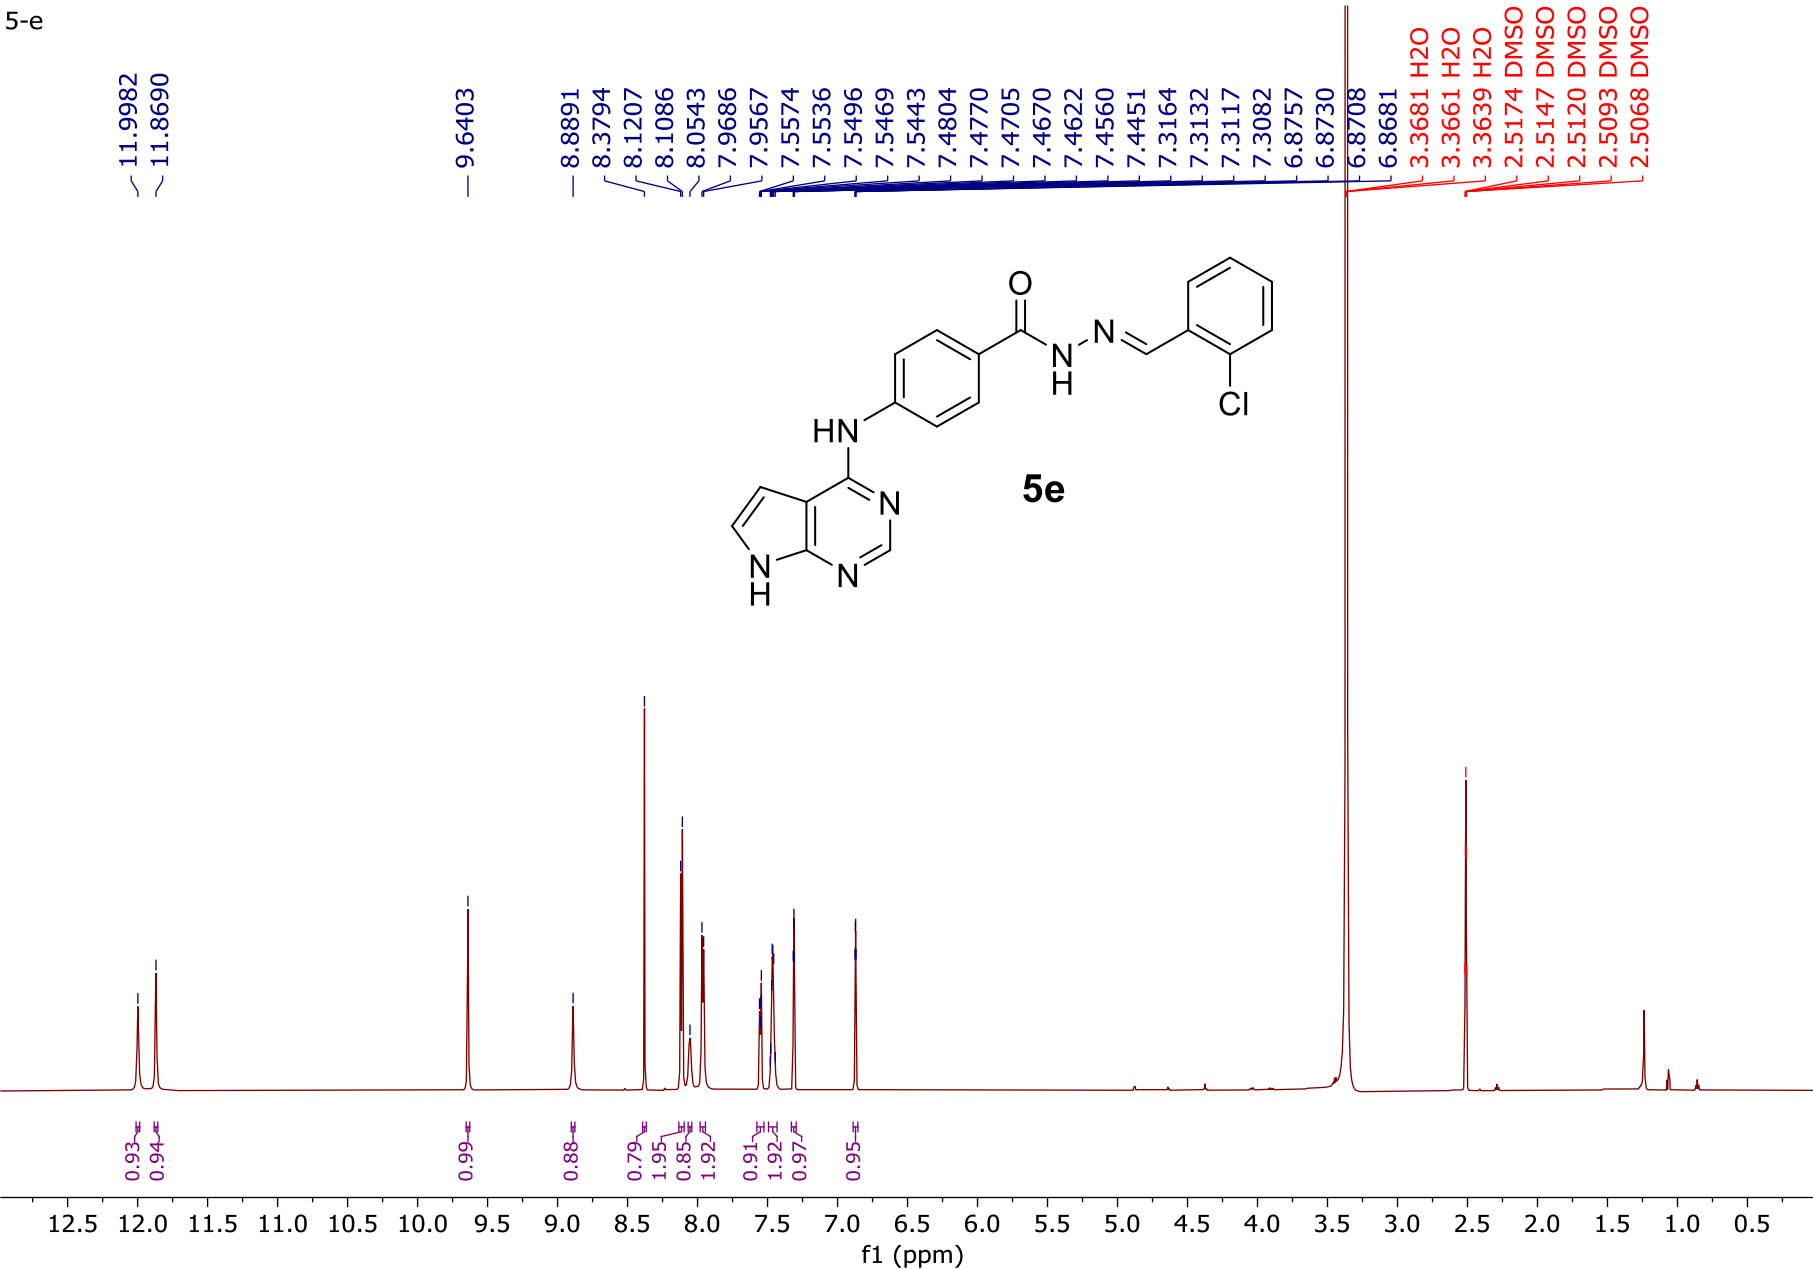

<sup>13</sup>C-NMR spectra of **5e**

5-e

- 163.2303
- 153.5017
- 151.5627
- 151.0708
- 144.5213
- 143.3935
- 133.5579
- 132.2239
- 131.8298
- 130.4056
- 128.9587
- 128.1149
- 127.3166
- 126.1495
- 123.2815
- 119.3193
- 104.6591
- 99.1963

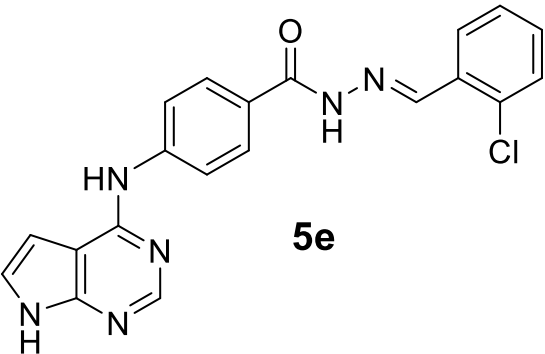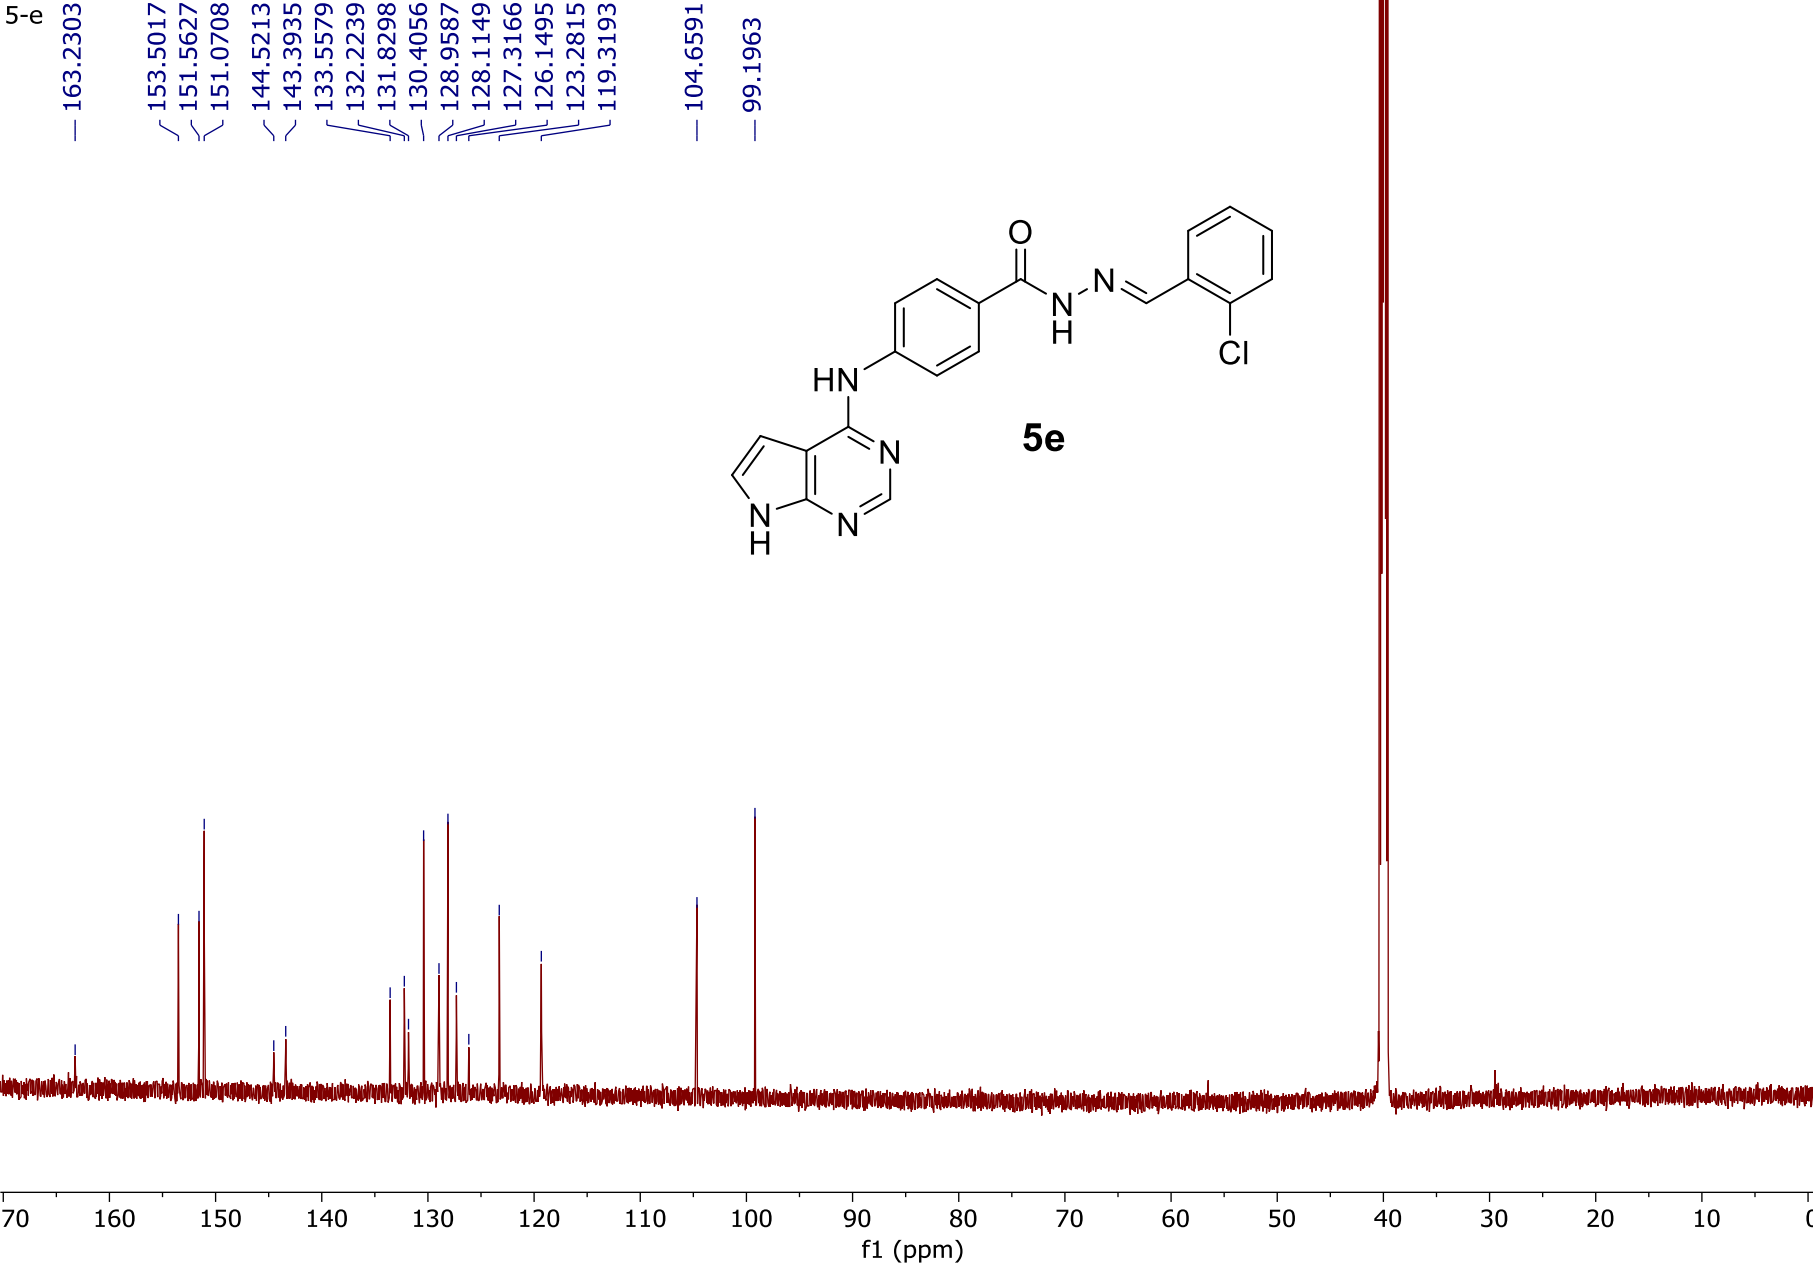

Mass spectra of **5e**

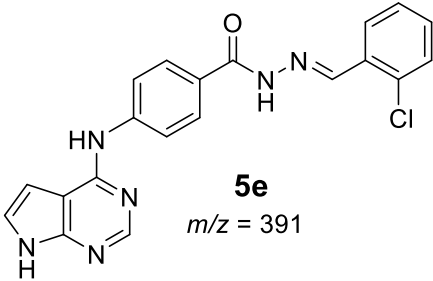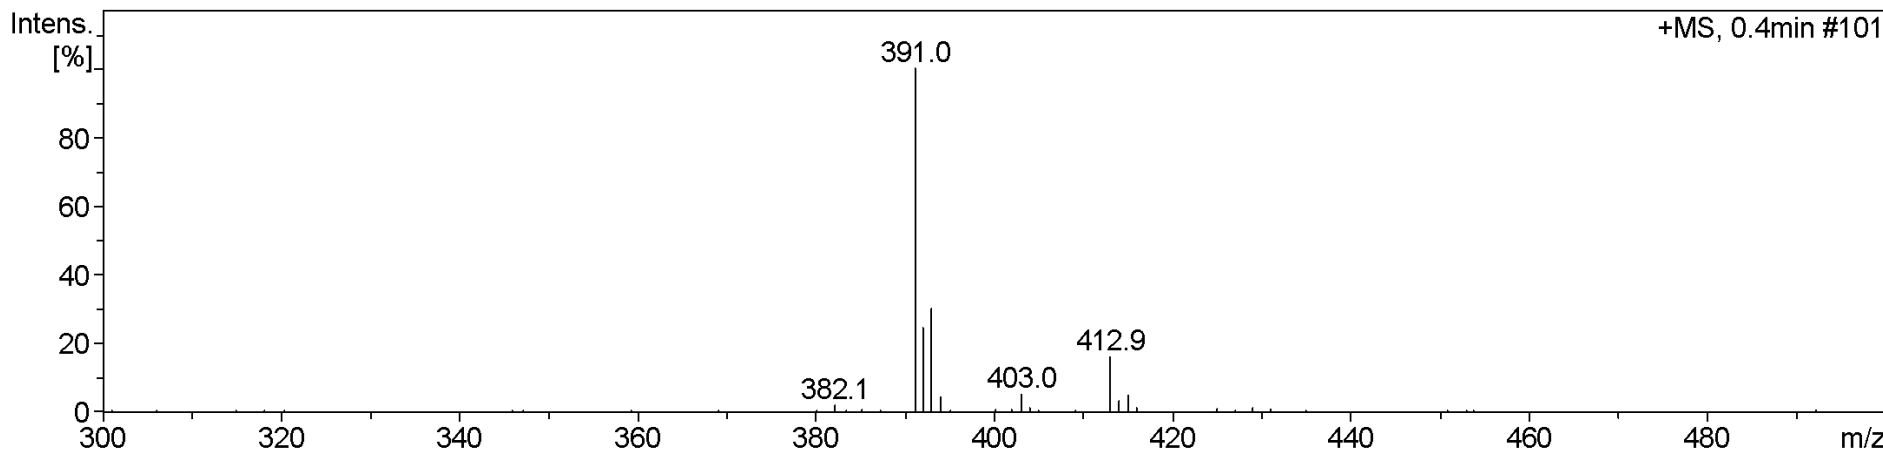

HMRS Mass spectra of **5e**

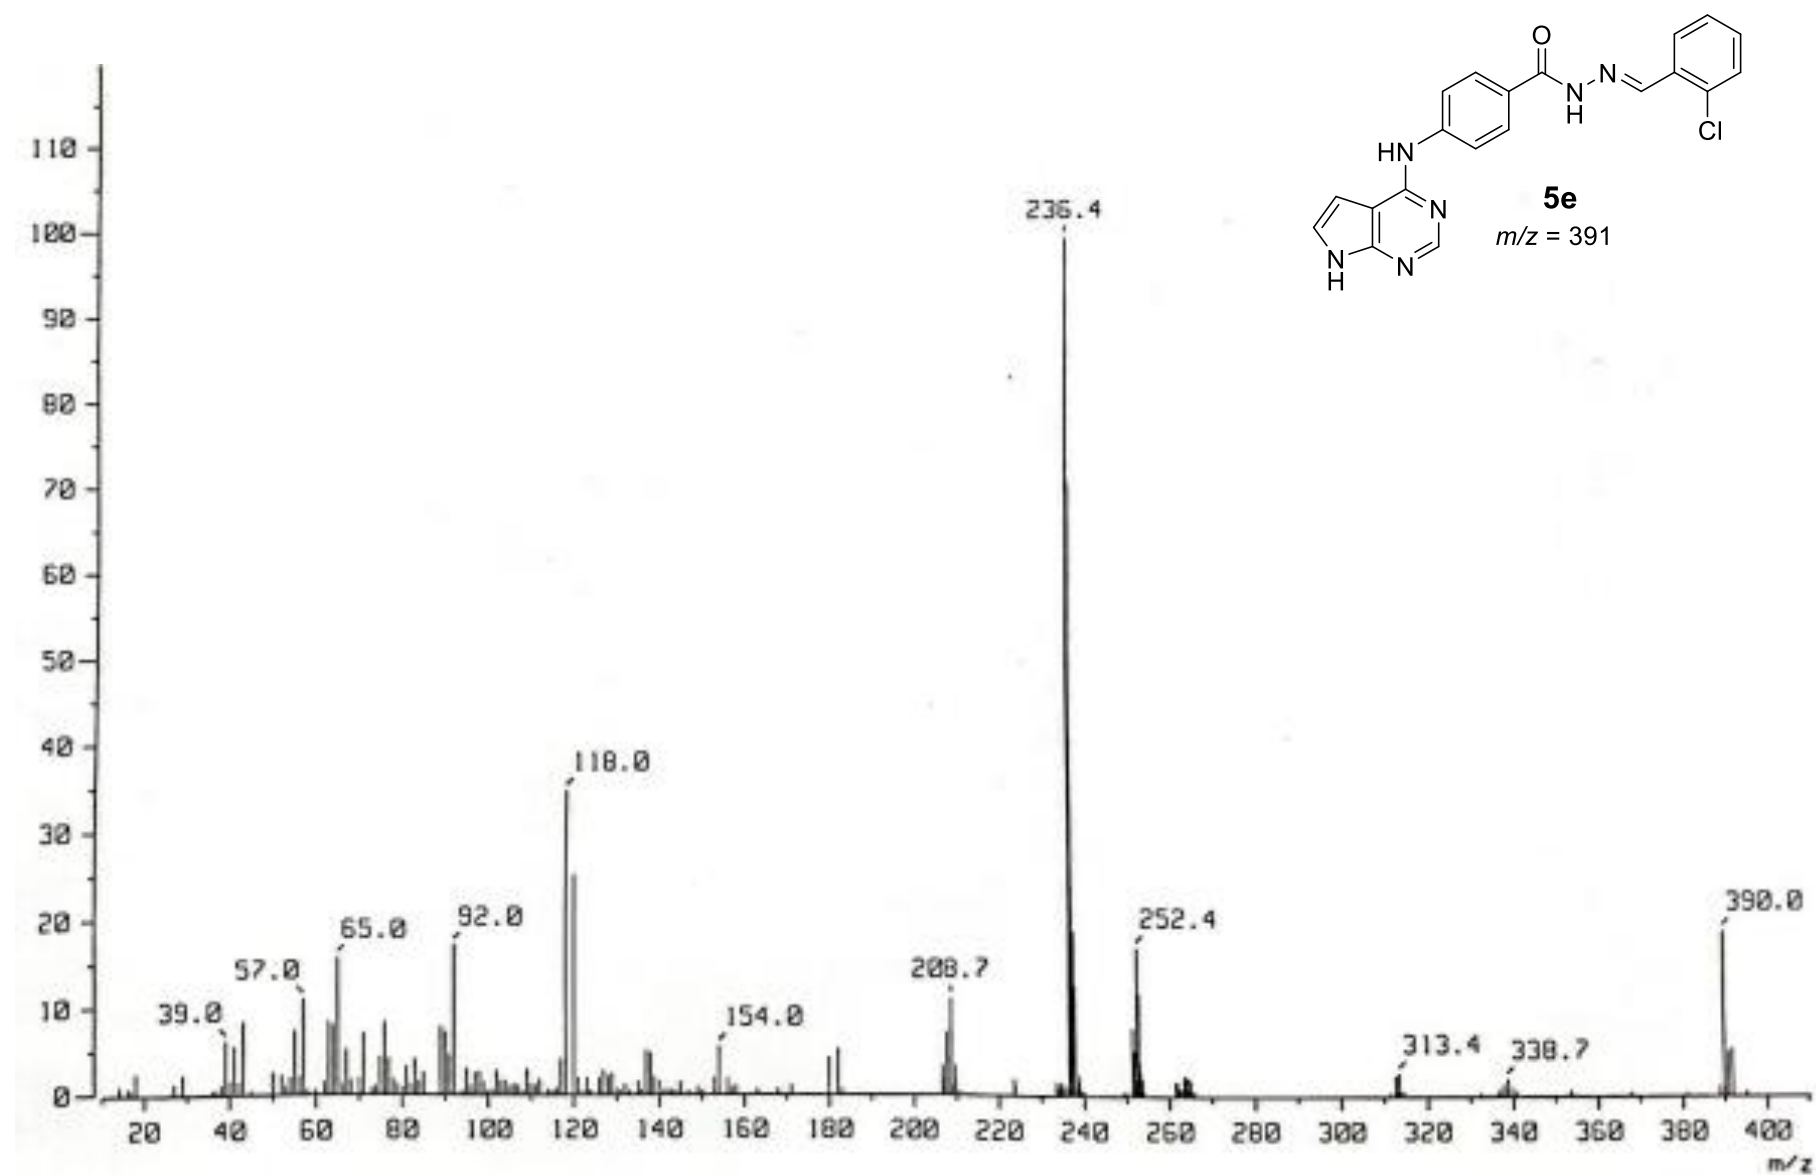



<sup>1</sup>H-NMR spectra of **5f**

5-f

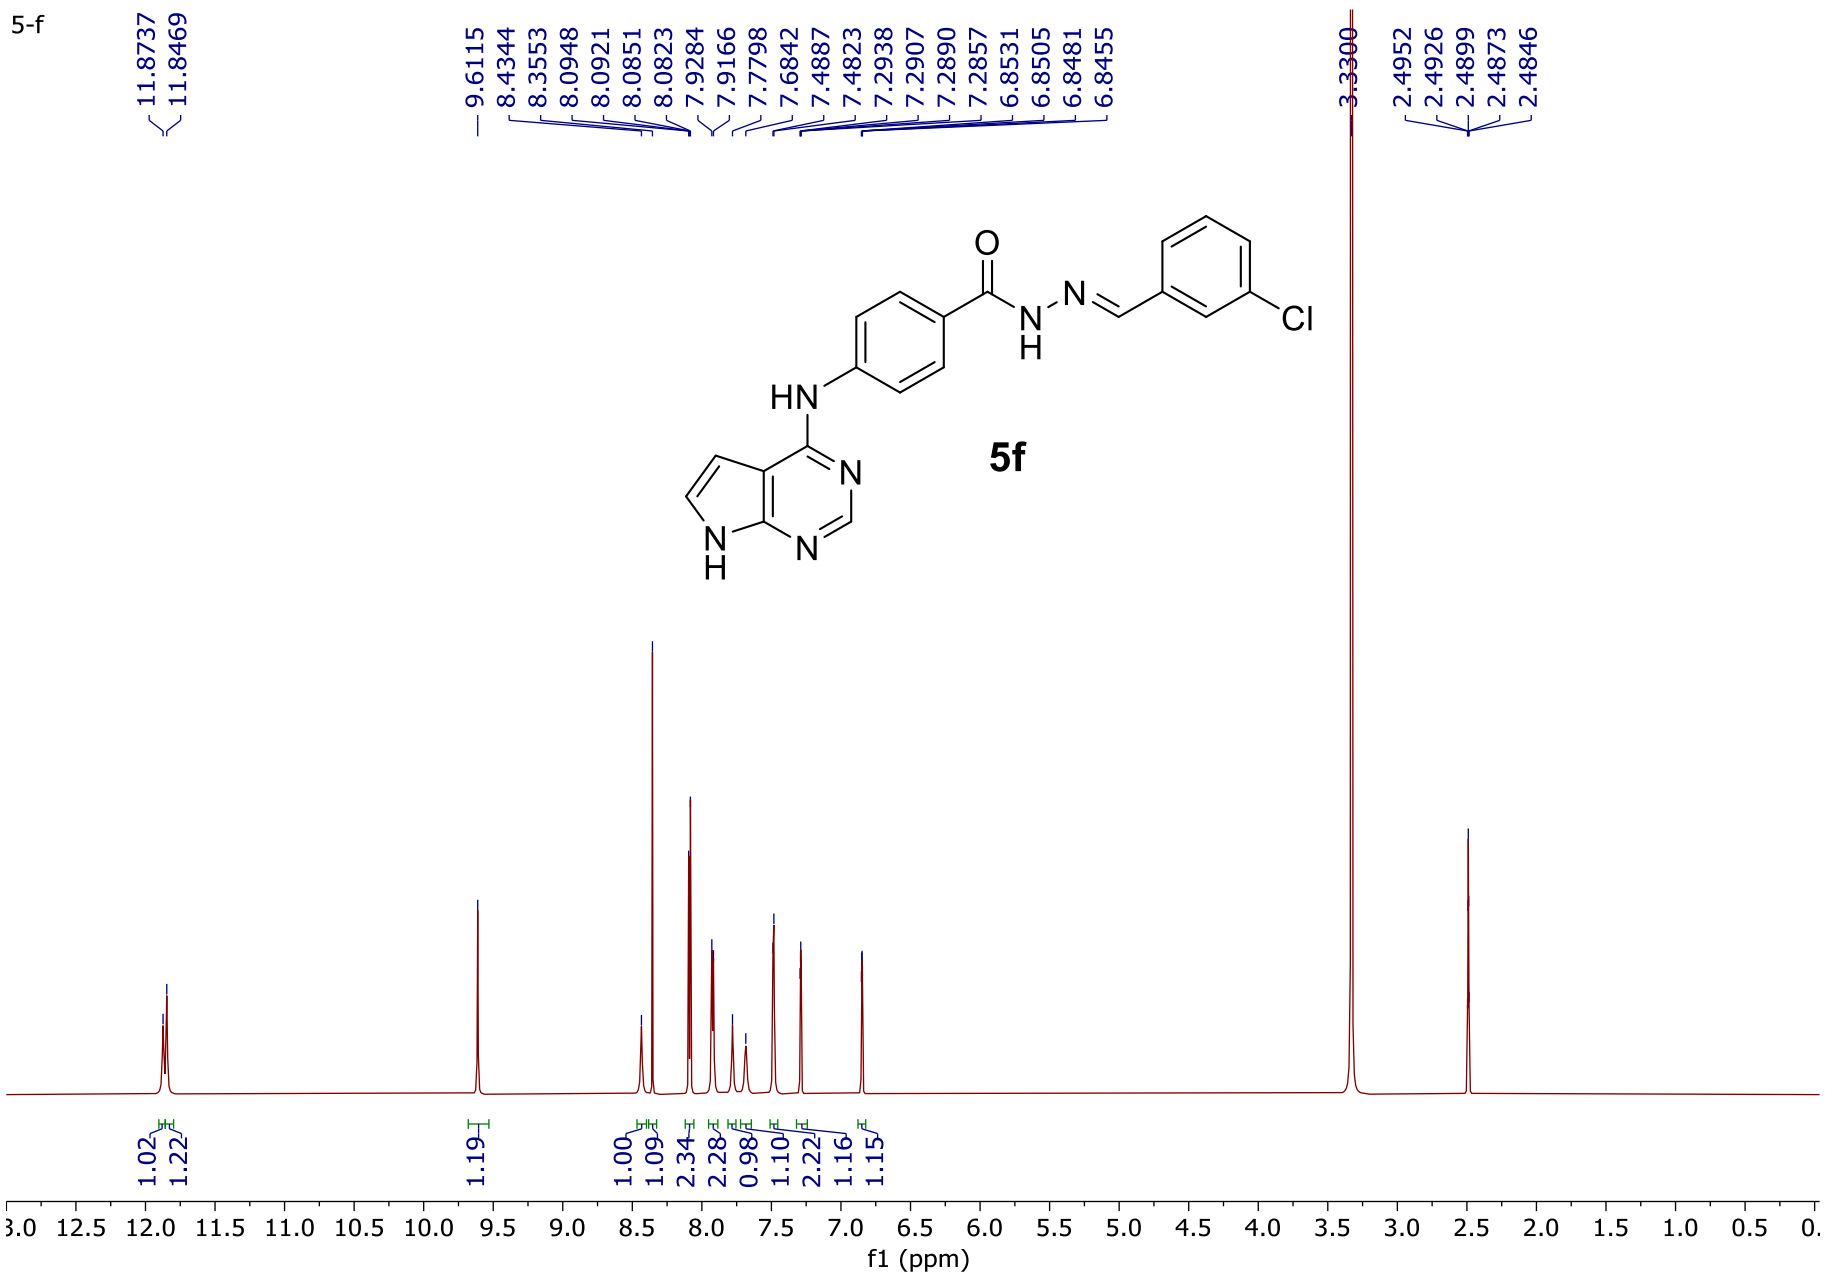

<sup>13</sup>C-NMR spectra of **5f**

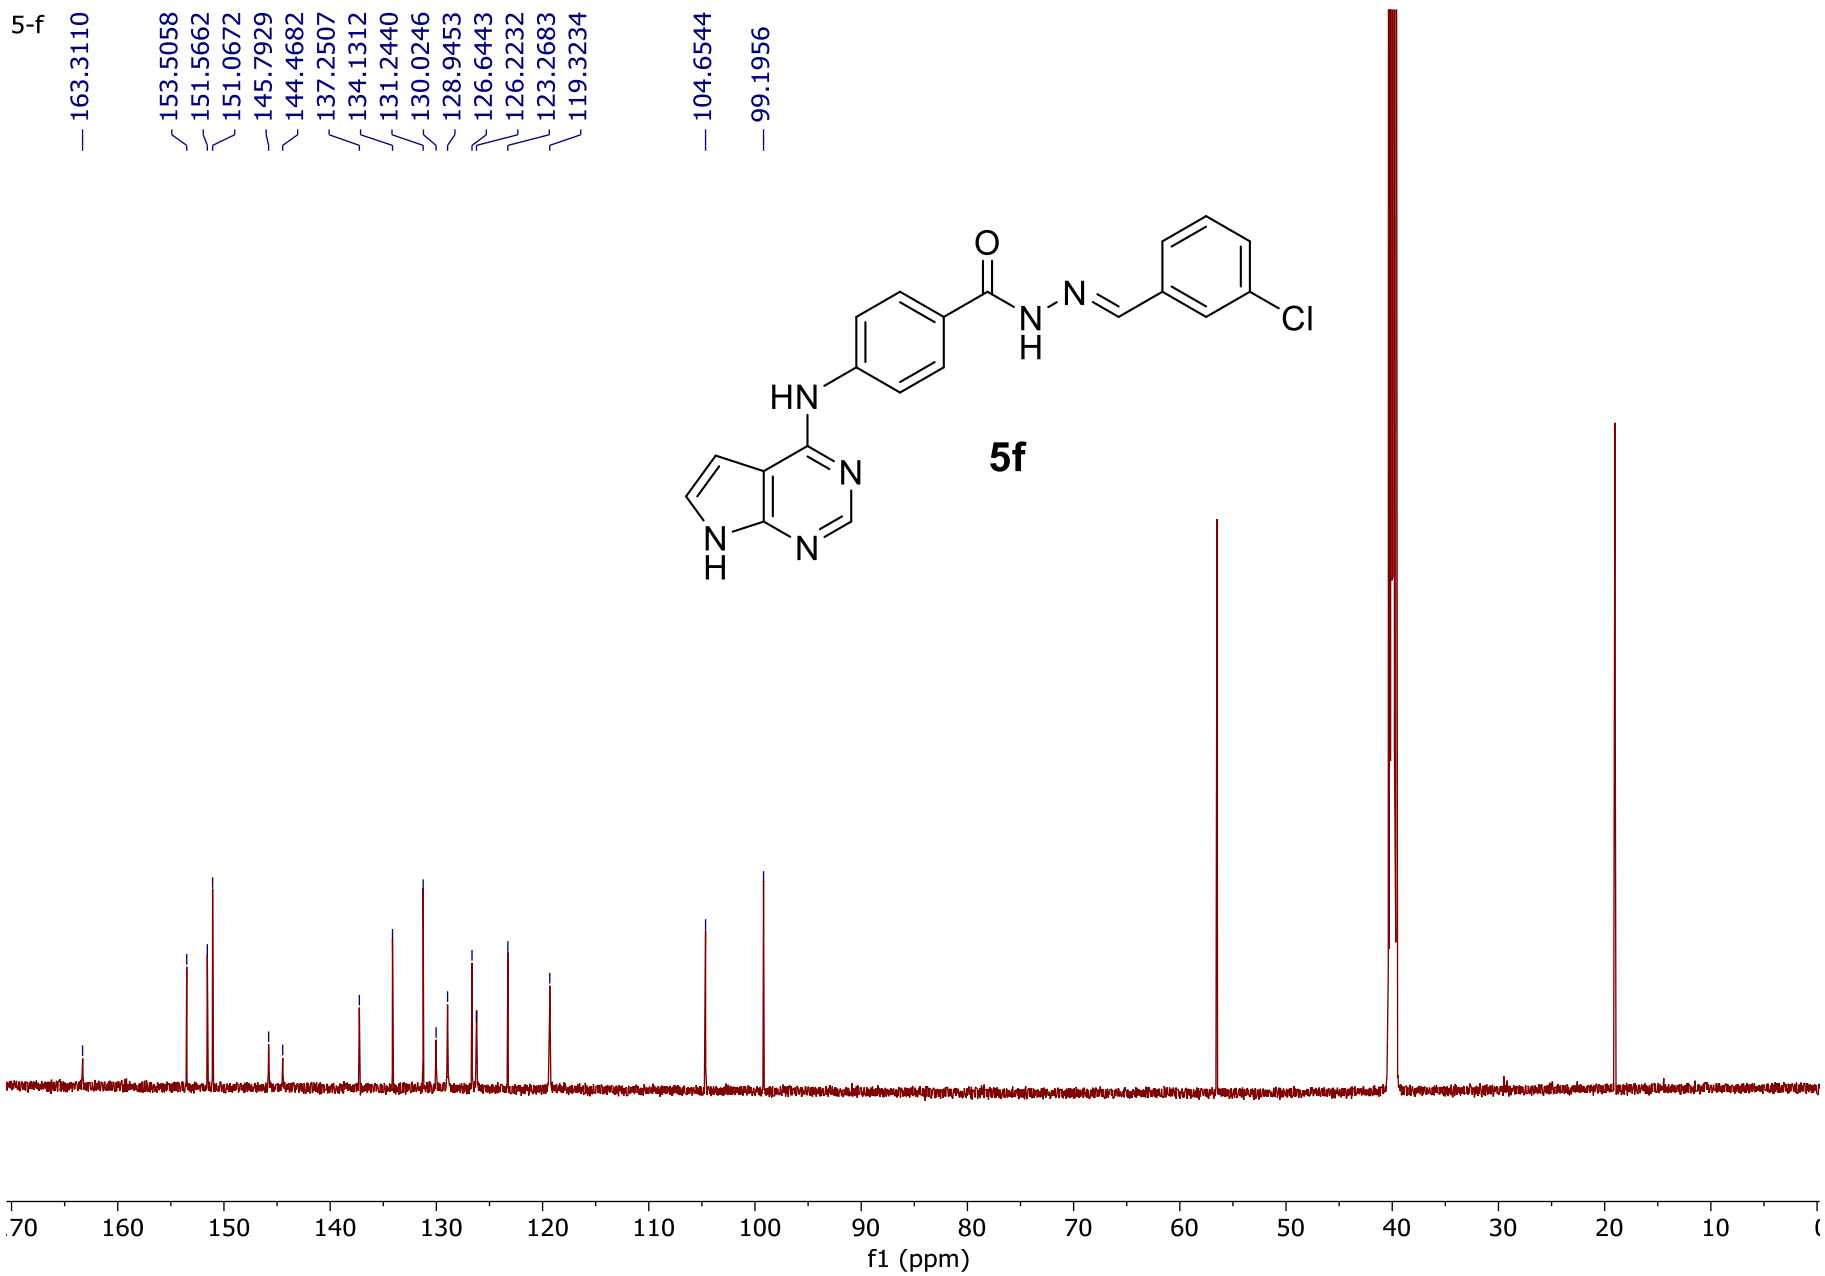

Mass spectra of **5f**

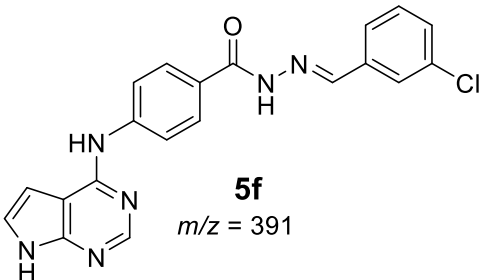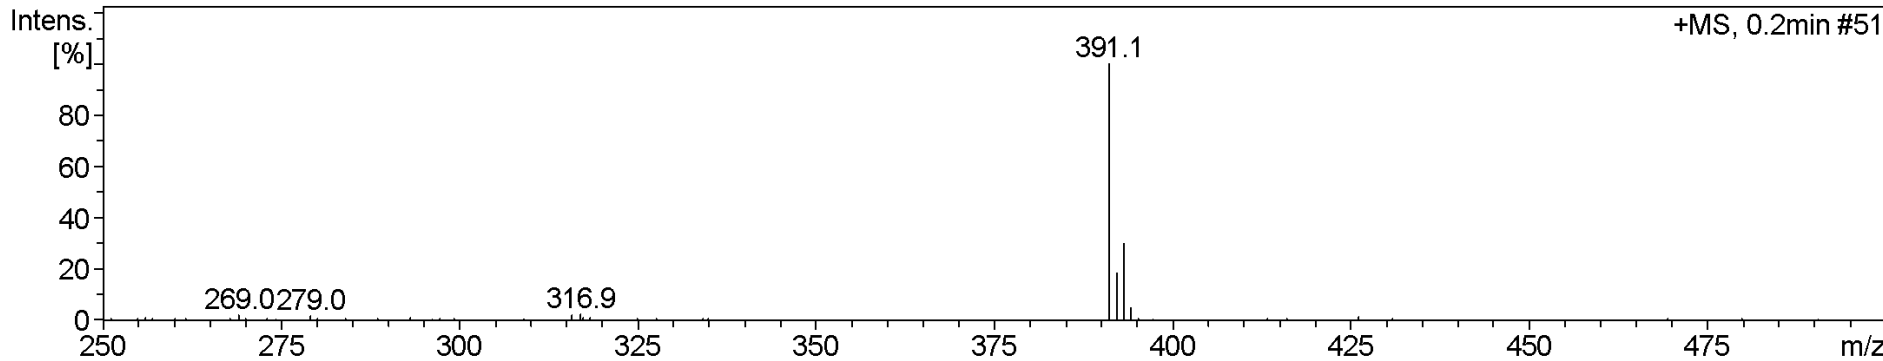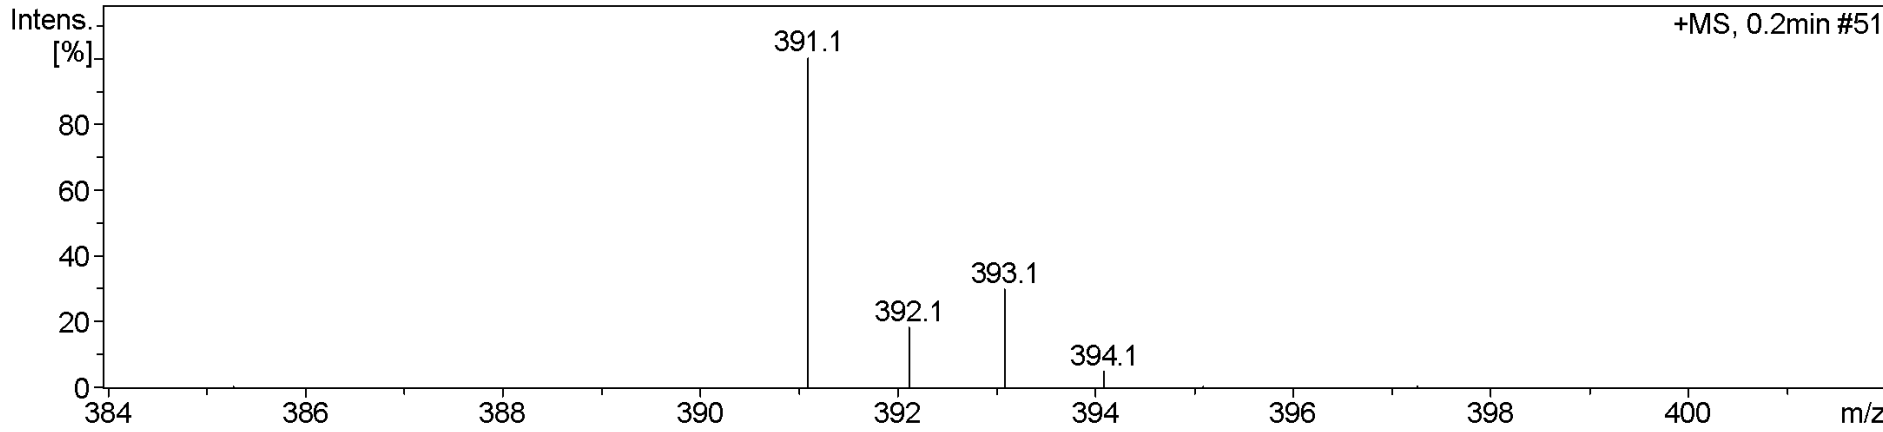

HMRS Mass spectra of **5f**

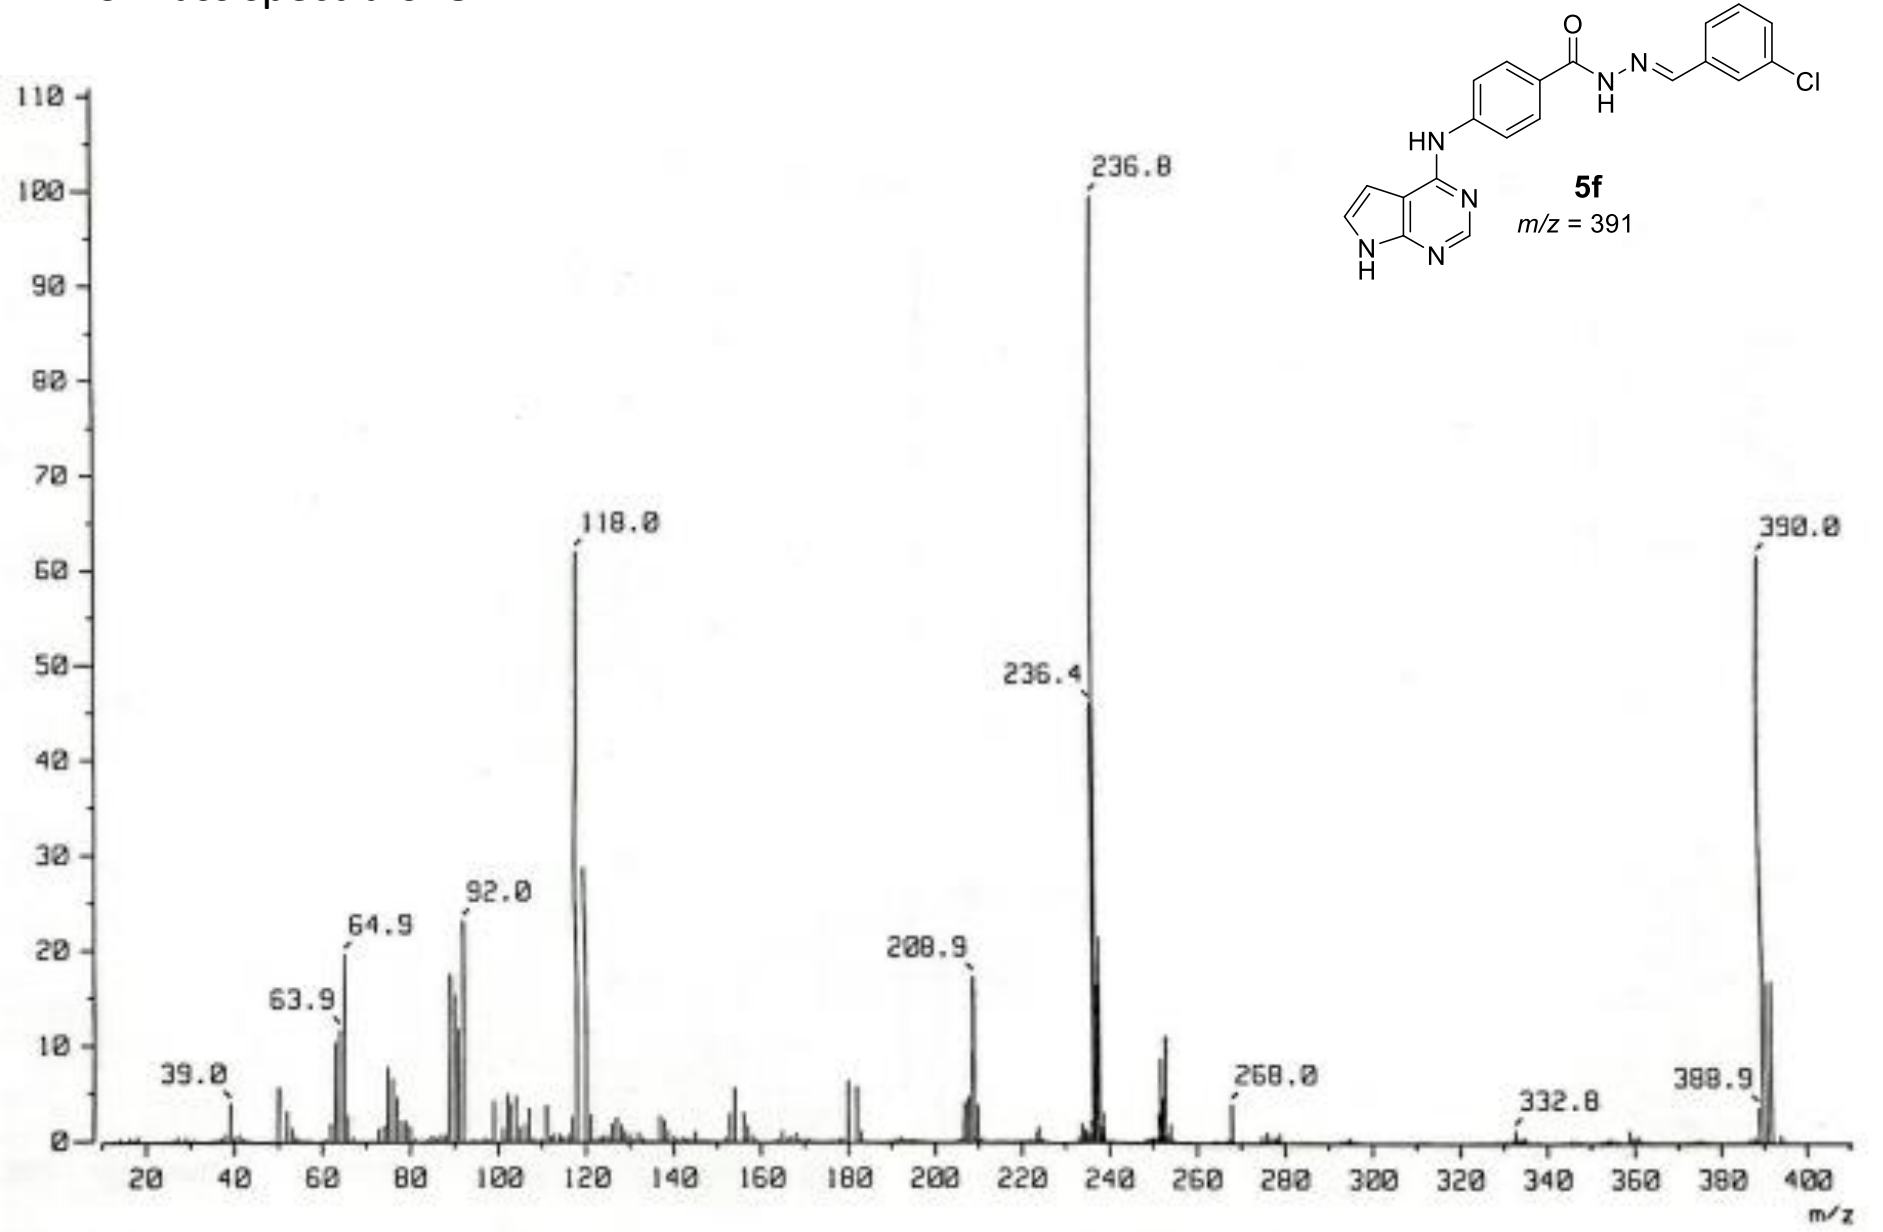

<sup>1</sup>H-NMR spectra of **5g**

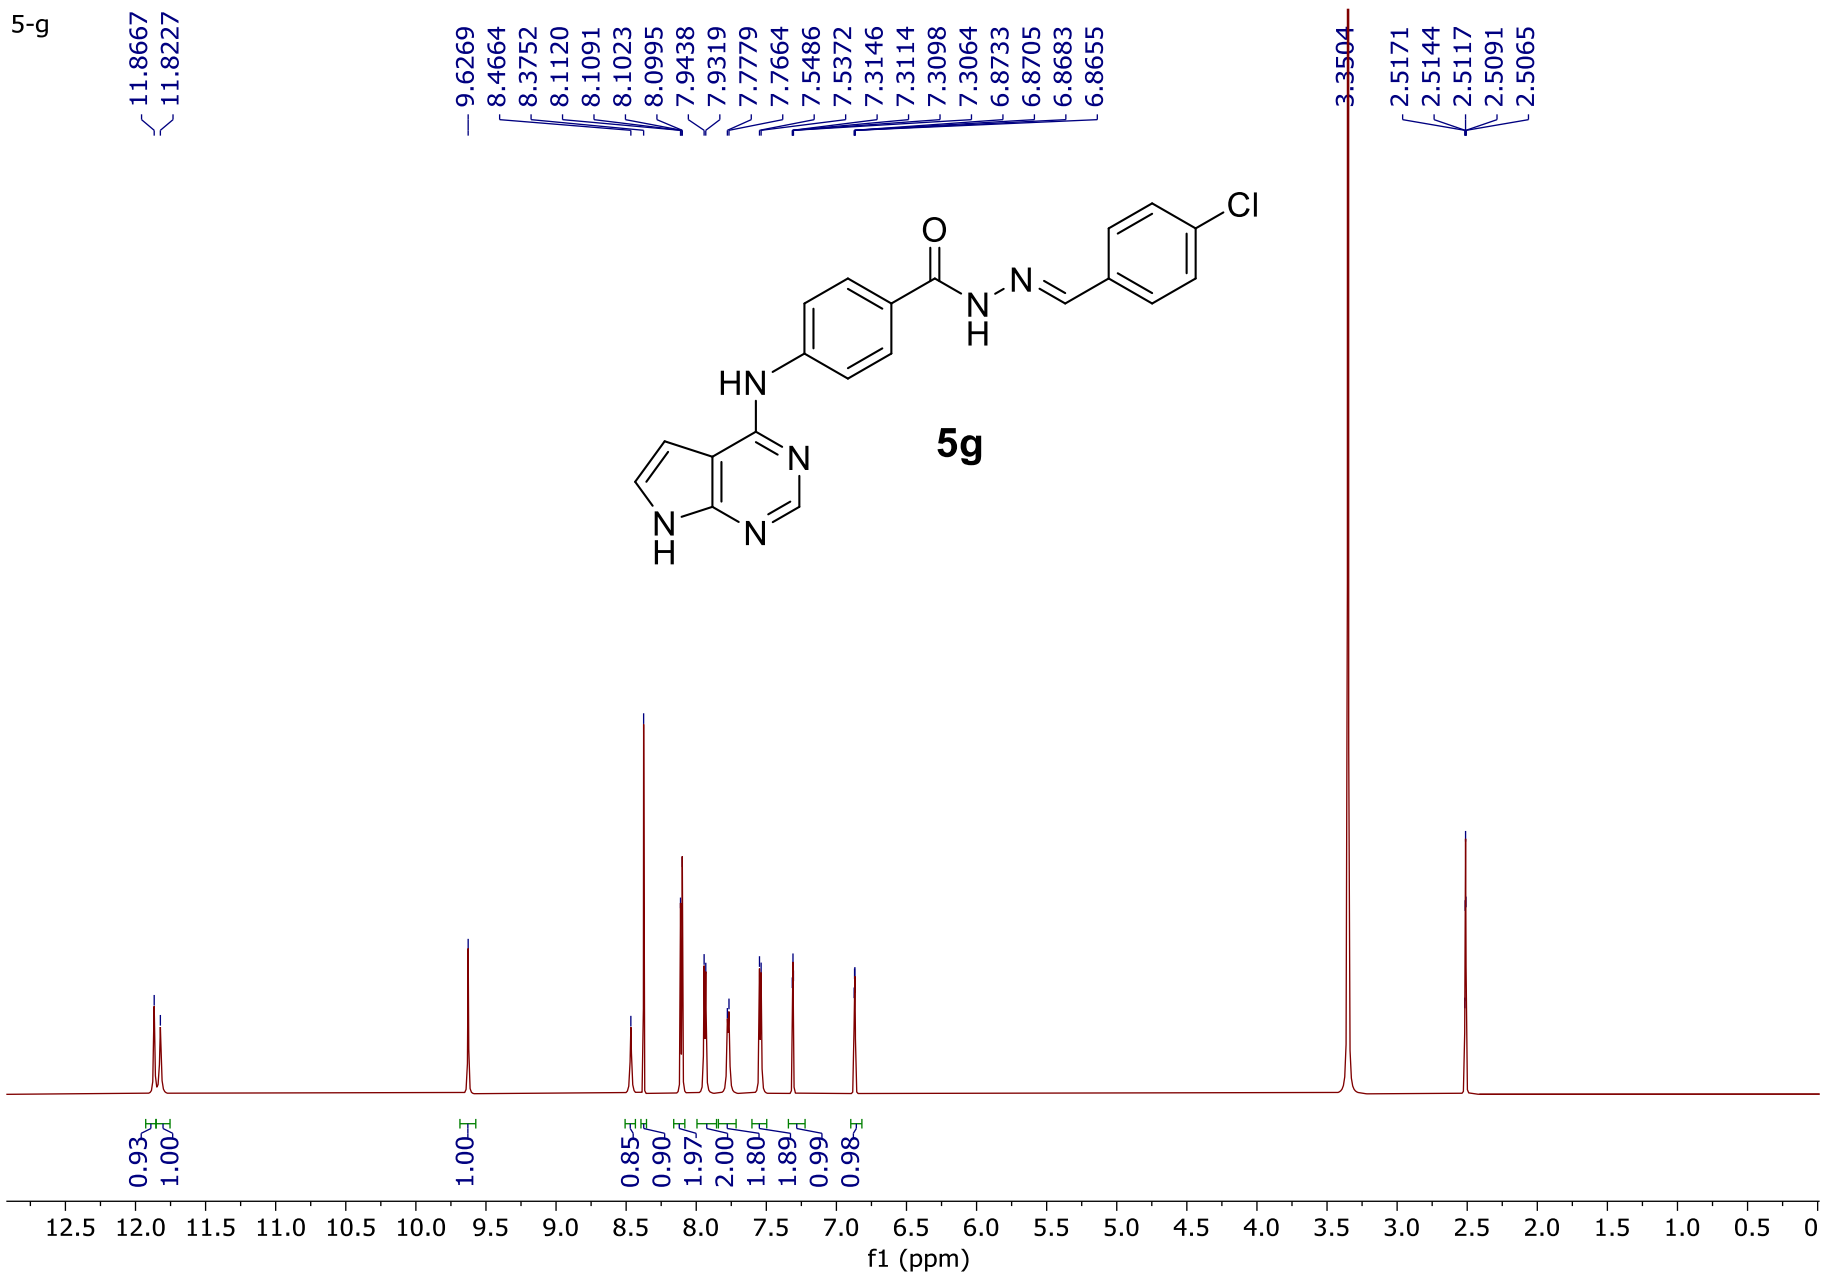

<sup>13</sup>C-NMR spectra of **5g**

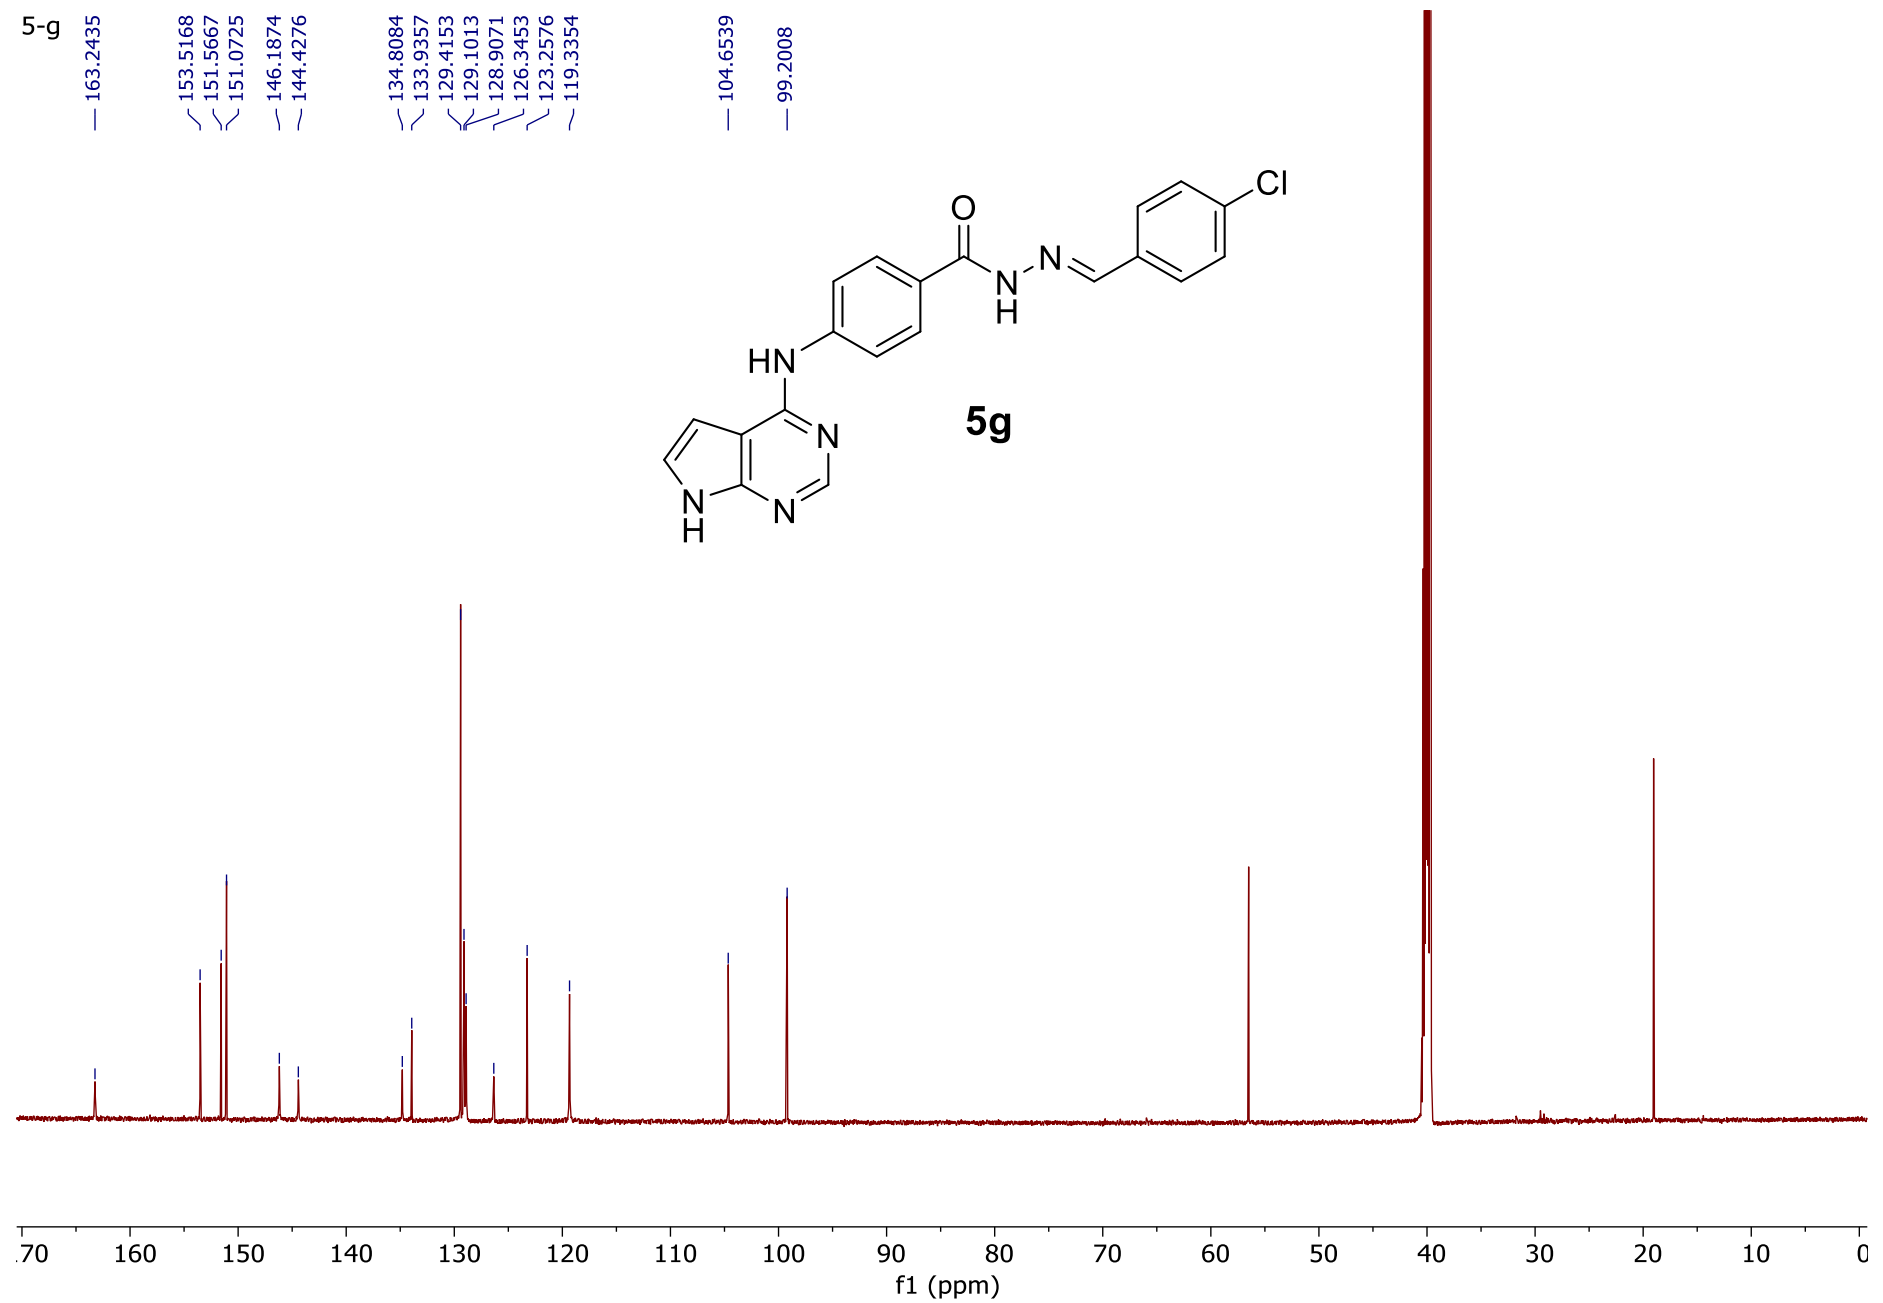

Mass spectra of **5g**

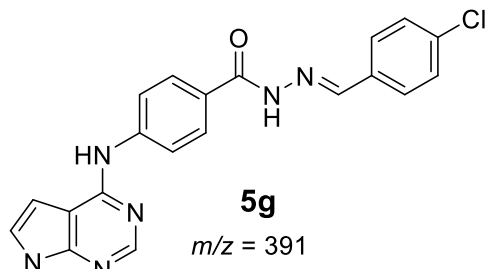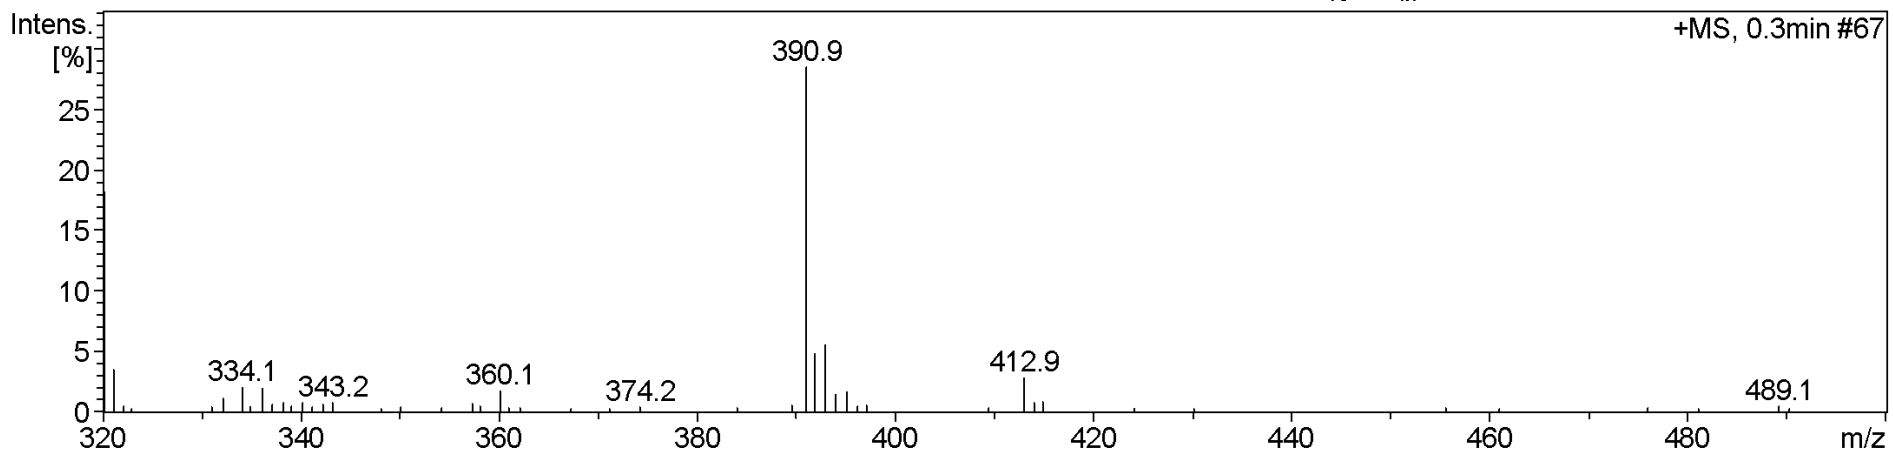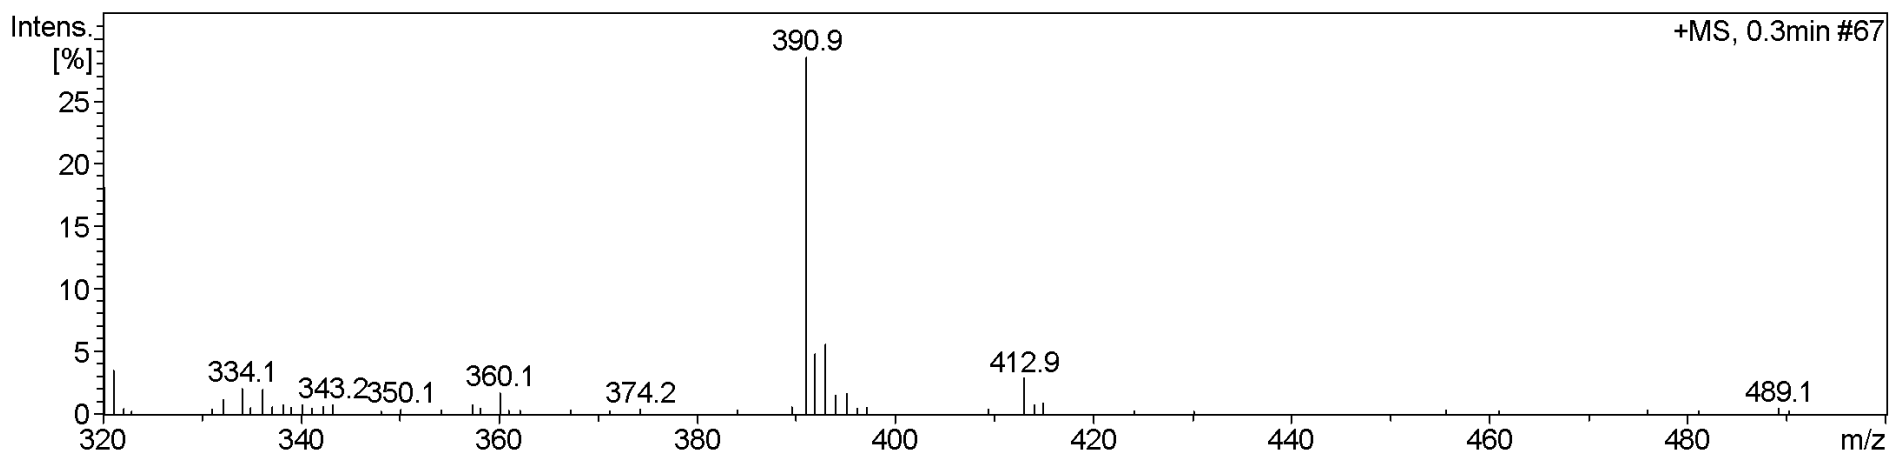

HMRS Mass spectra of **5g**

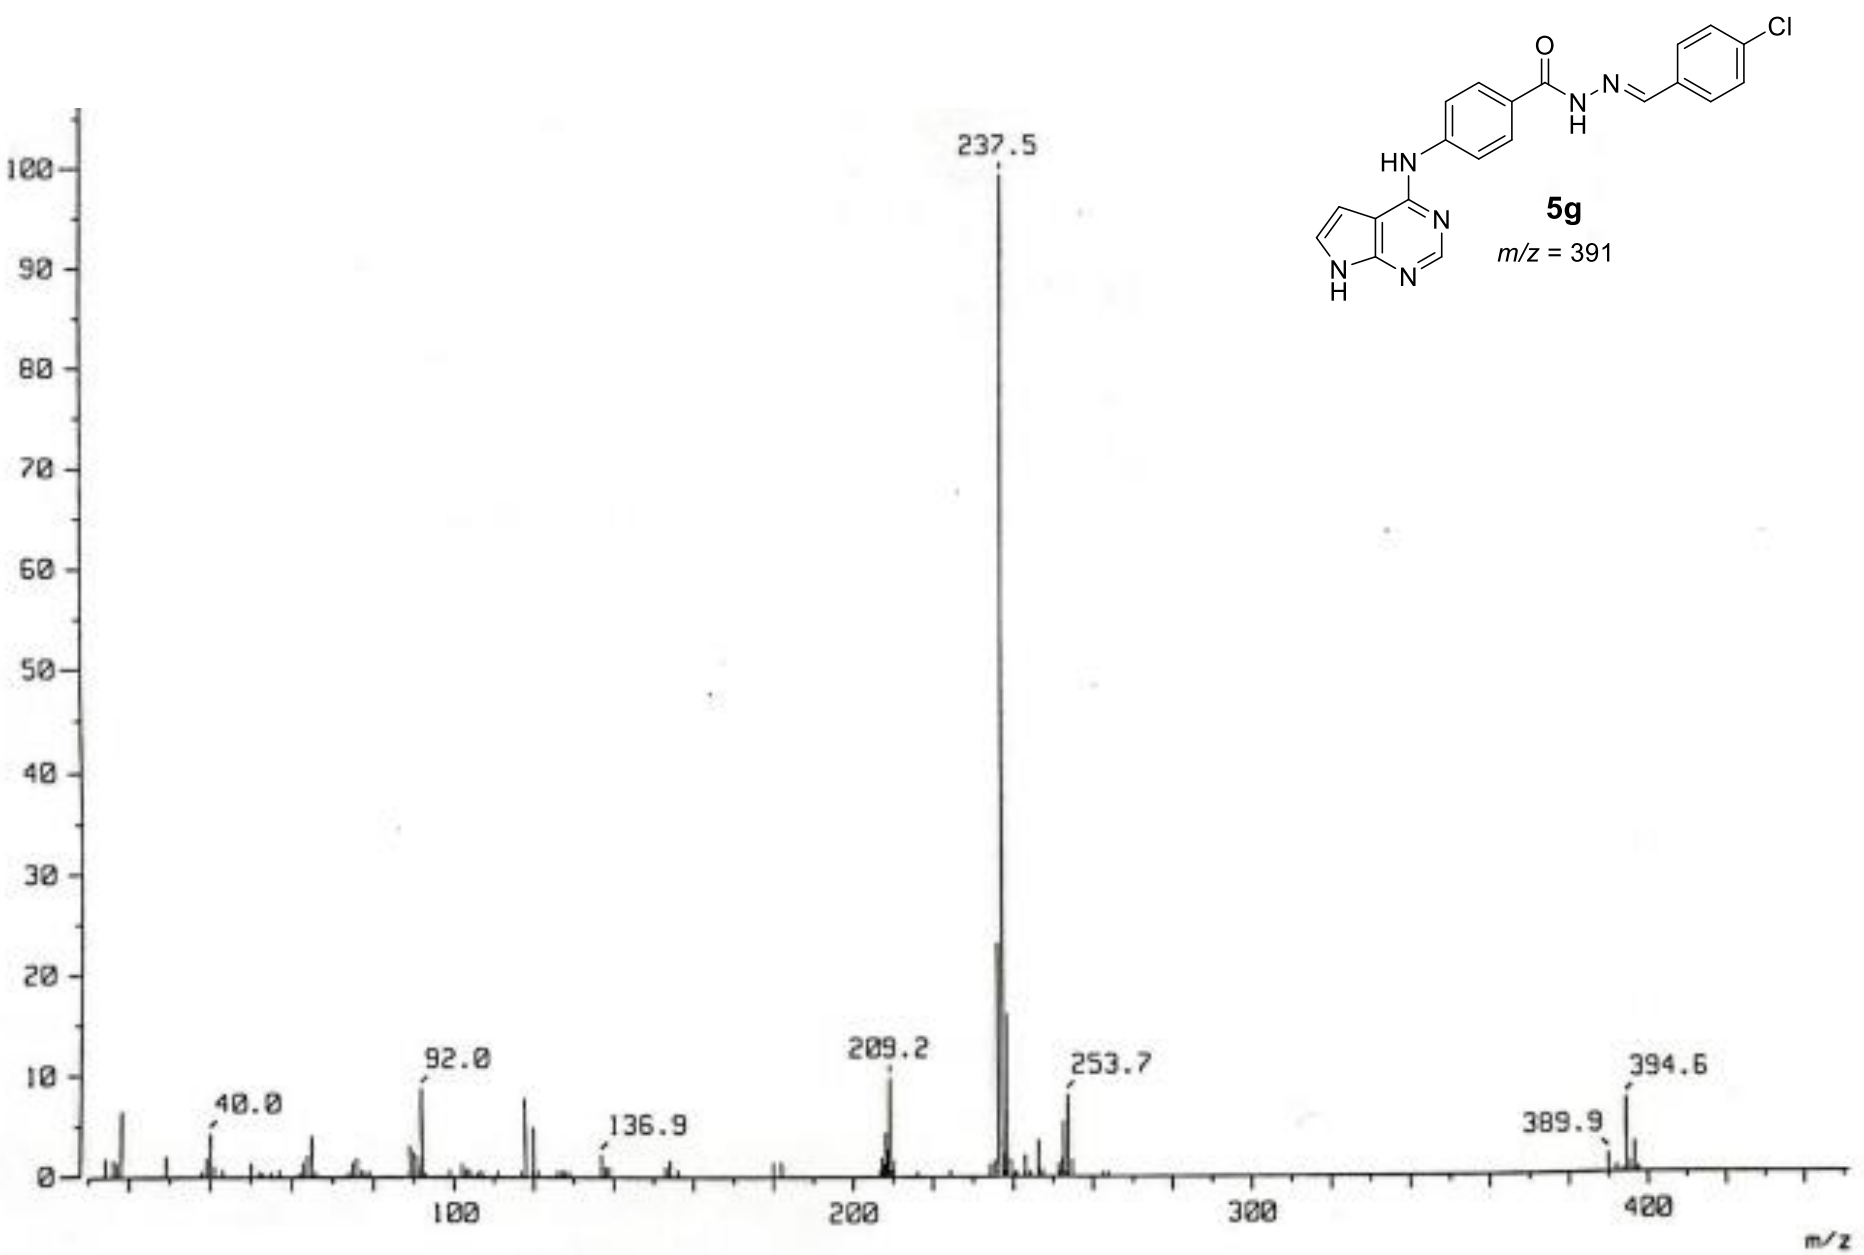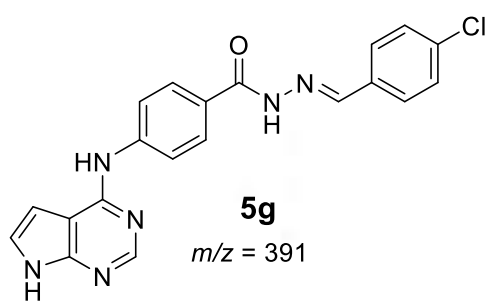



<sup>1</sup>H-NMR spectra of **5h**

5-h

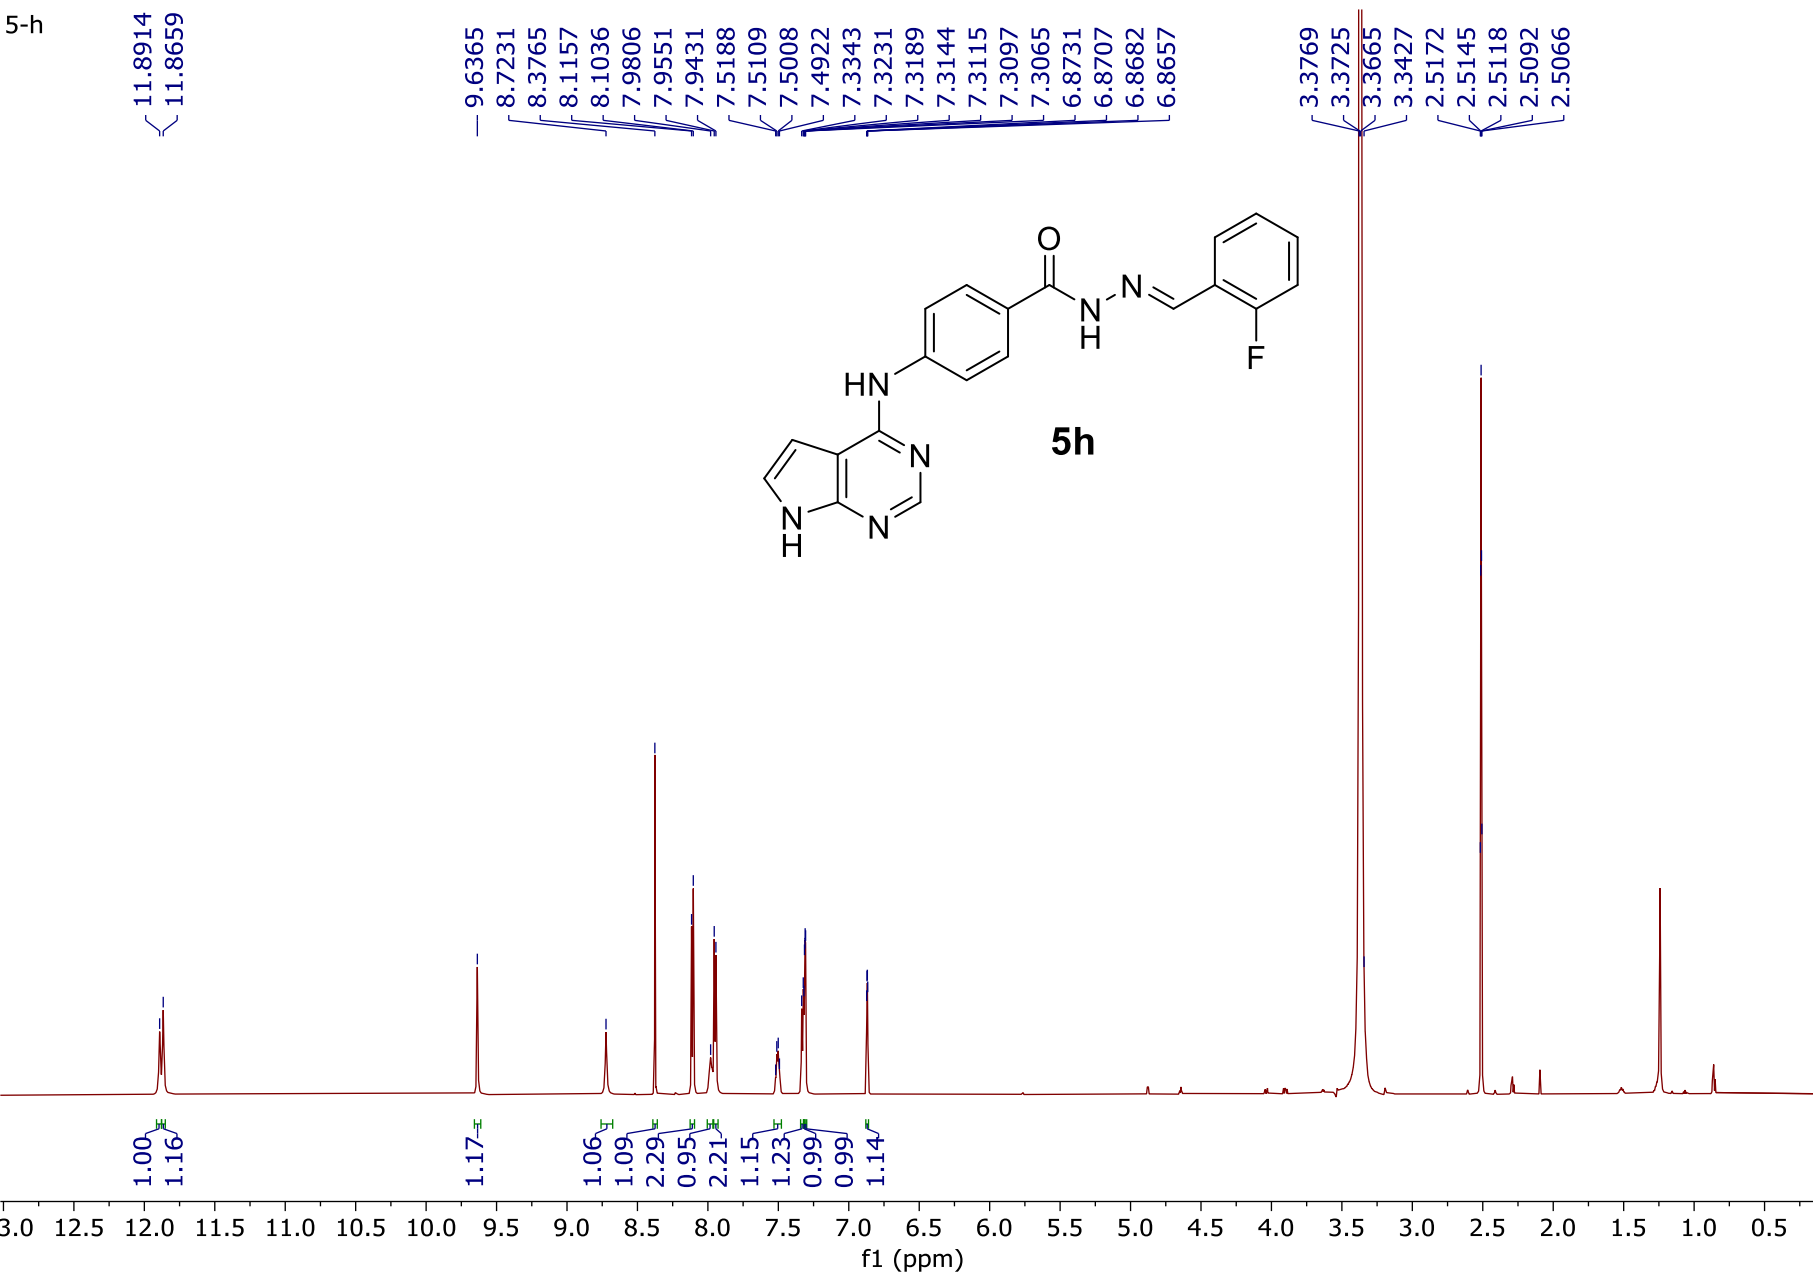

<sup>13</sup>C-NMR spectra of **5h**

5-h

- 163.2757
- 161.9301
- 160.5125
- 153.5091
- 151.5180
- 151.0640
- 144.4768
- 140.2631
- 132.3788
- 128.9195
- 126.8029
- 126.7879
- 126.1604
- 125.4478
- 125.4297
- 123.2975
- 122.4849
- 122.4294
- 119.3733
- 116.5243
- 116.4066
- 104.6498
- 99.2081

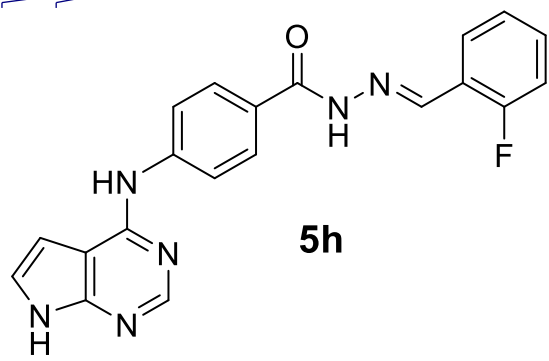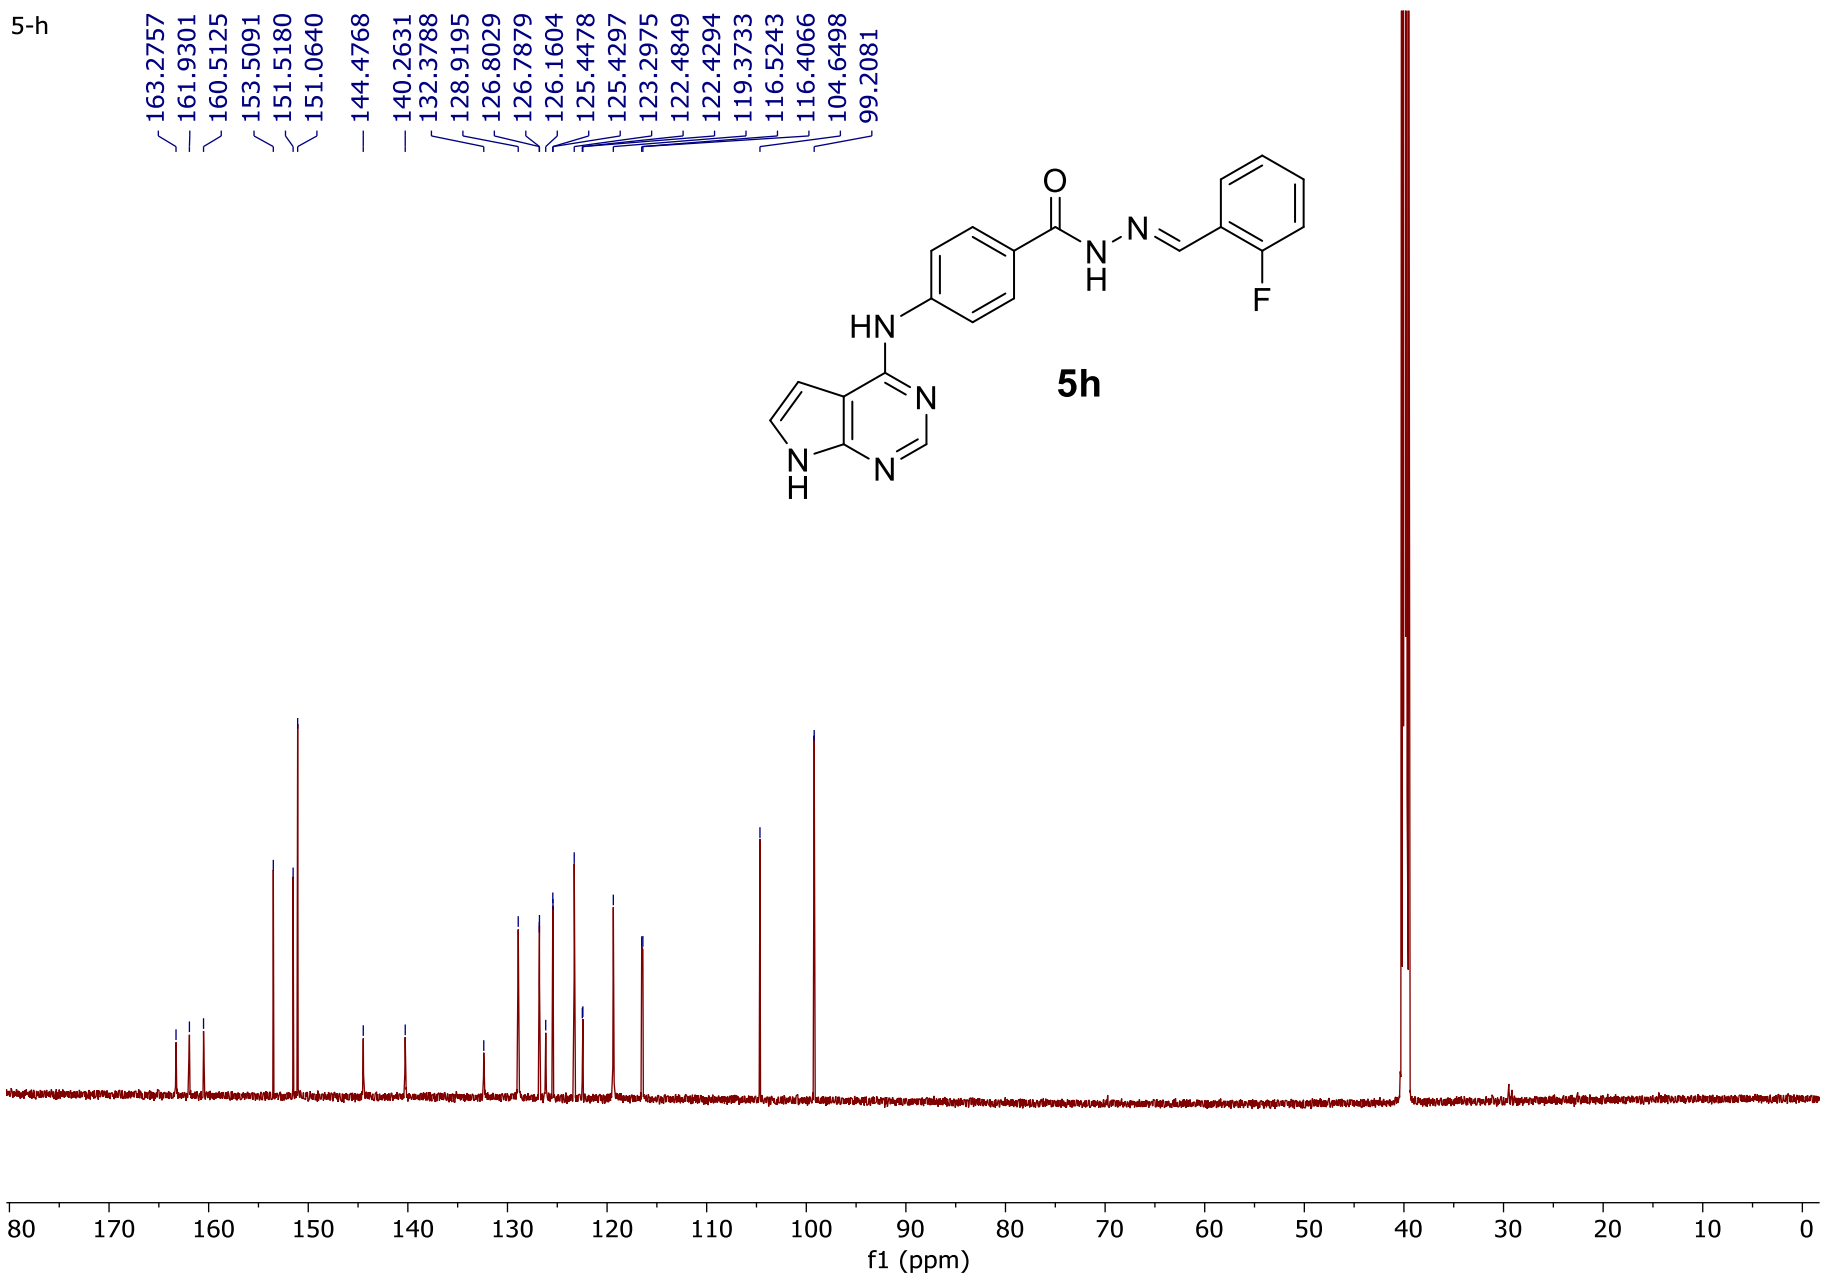

Mass spectra of **5h**

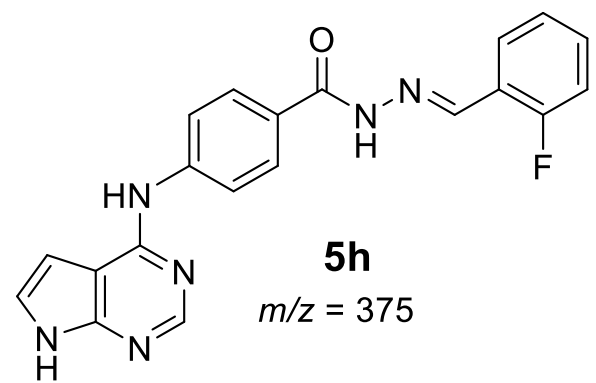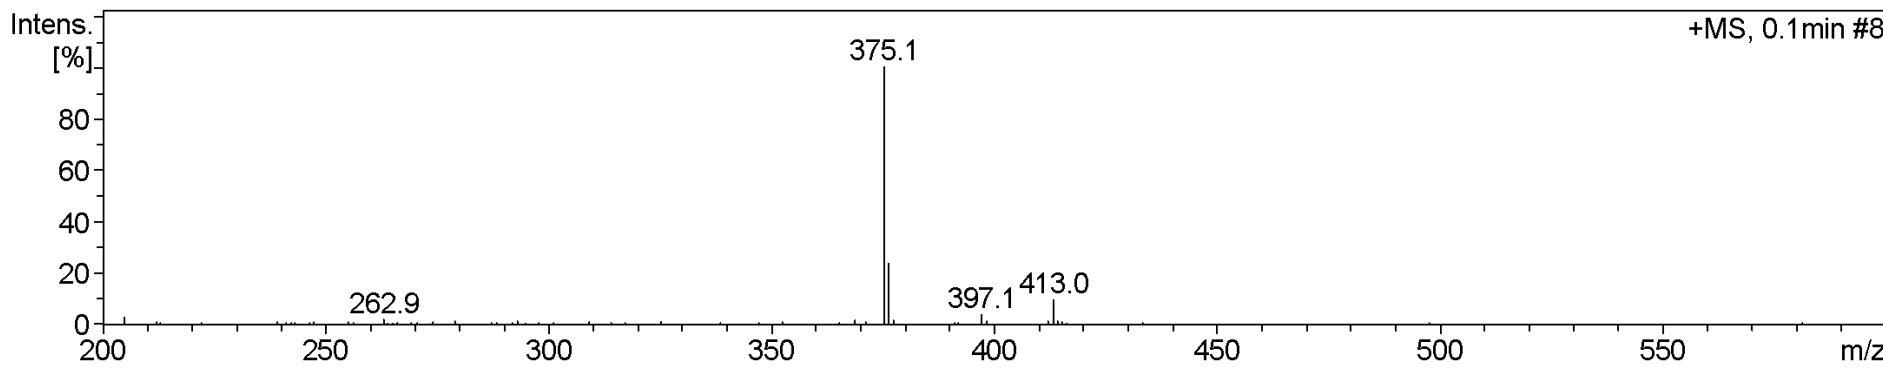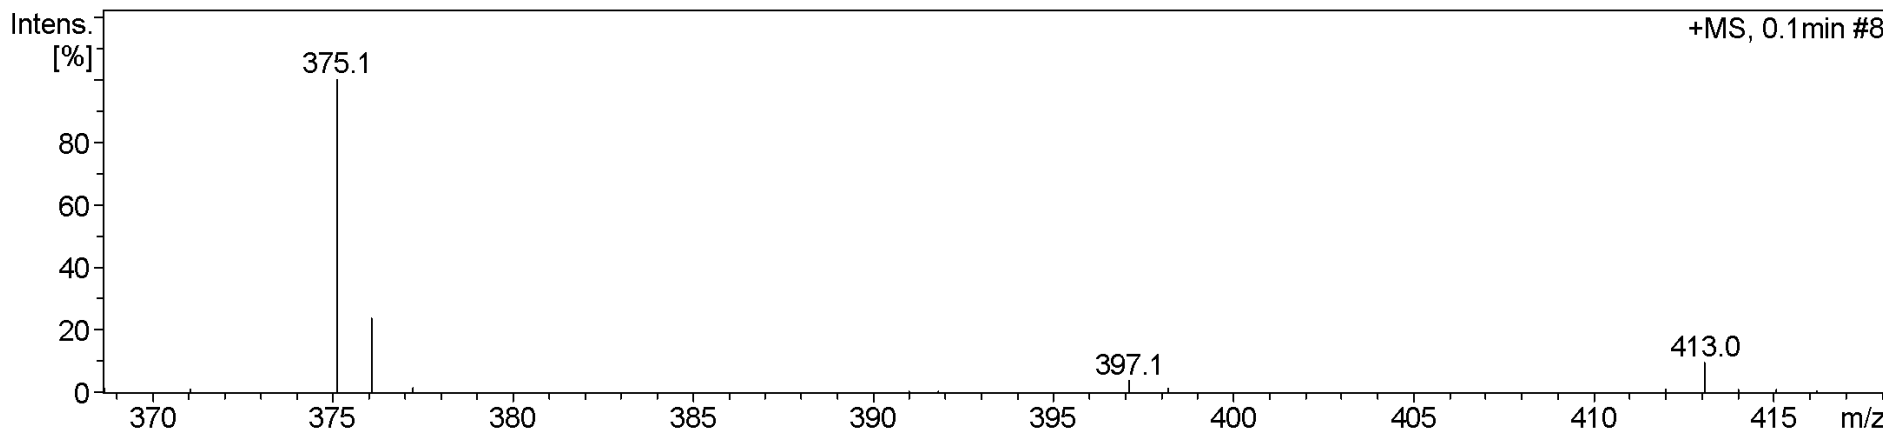

HMRS Mass spectra of **5h**

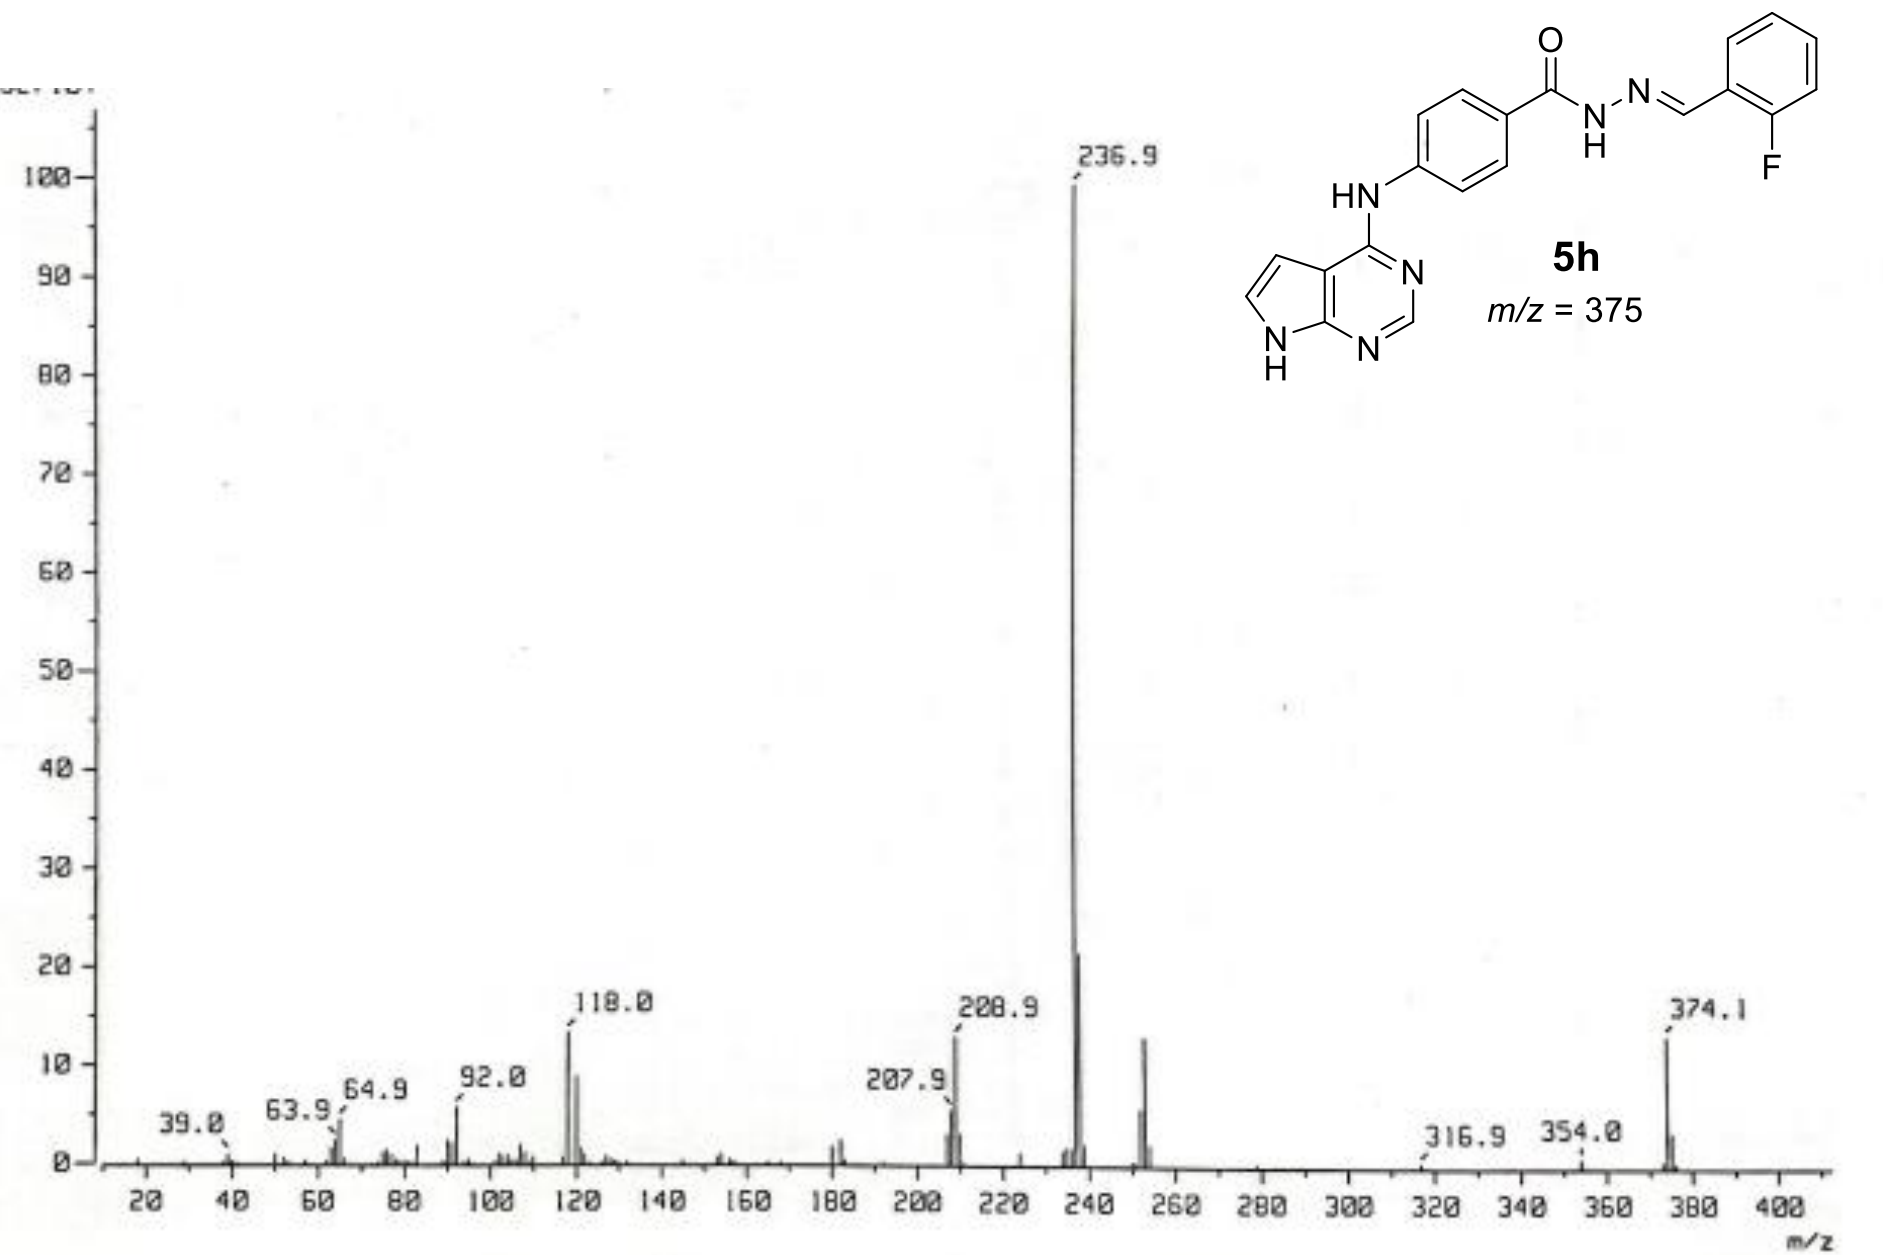

<sup>1</sup>H-NMR spectra of **5i**

**5-i**

11.8680  
11.8293  
9.6384  
8.4395  
8.3448  
8.0824  
8.0699  
7.9180  
7.9061  
7.5693  
7.5574  
7.5386  
7.5148  
7.5044  
7.4944  
7.4838  
7.2859  
7.2826  
7.2810  
7.2777  
7.2717  
7.2681  
7.2595  
7.2558  
7.2472  
7.2434  
6.8439  
6.8413  
6.8390  
6.8362

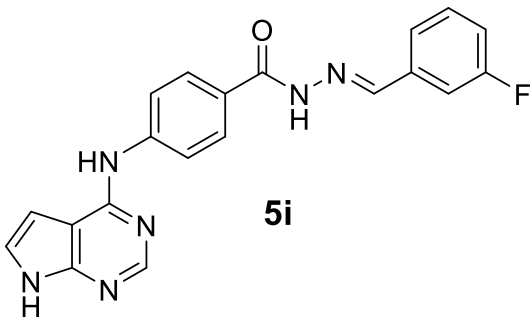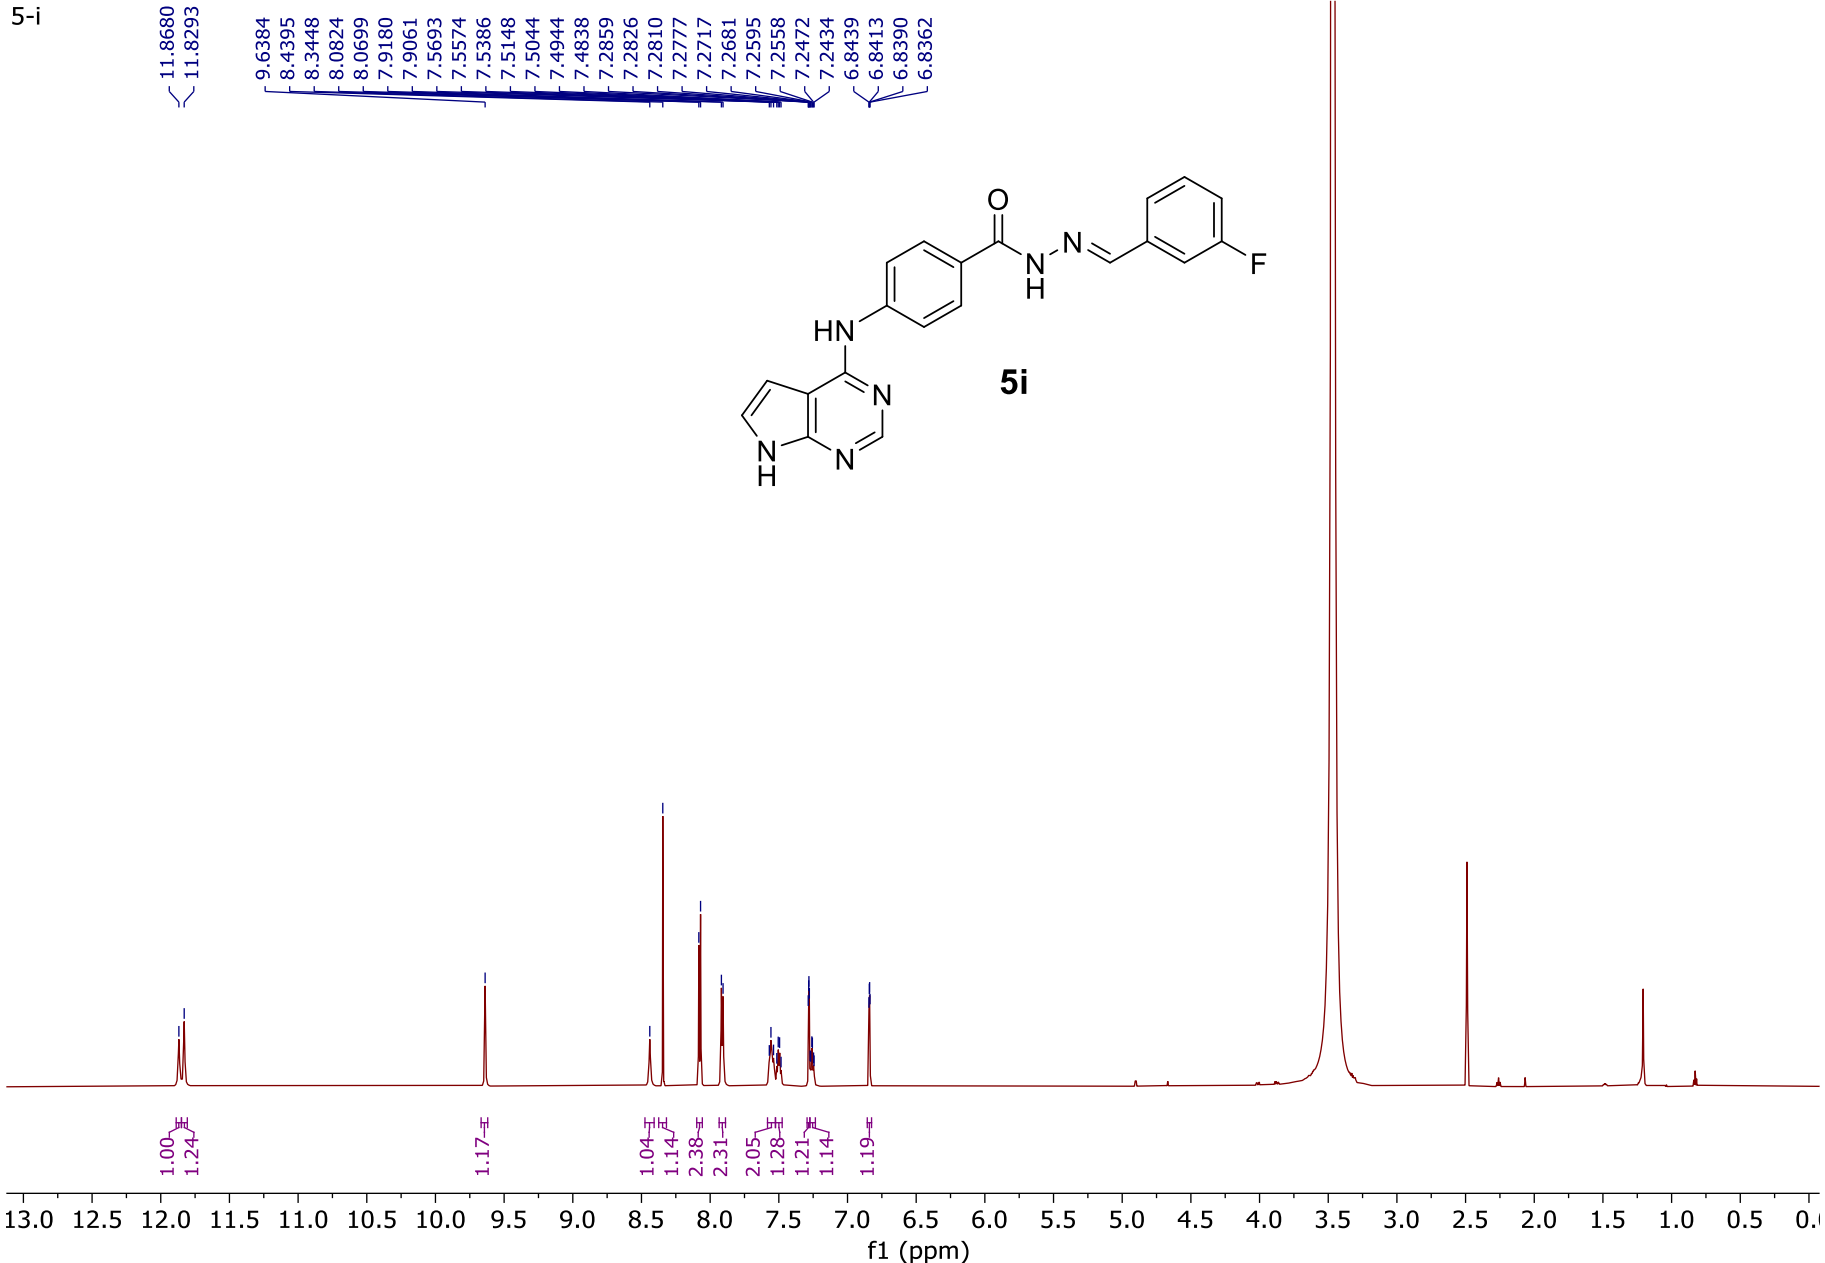

<sup>13</sup>C-NMR spectra of **5i**

5-i

163.5924  
163.4190  
162.2072  
153.5096  
151.4963  
151.0535  
146.2633  
144.4461  
137.5285  
137.4816  
131.4491  
131.4014  
128.9269  
126.2012  
123.9393  
123.3046  
119.3760  
113.4378  
113.3151  
104.6405  
99.2102

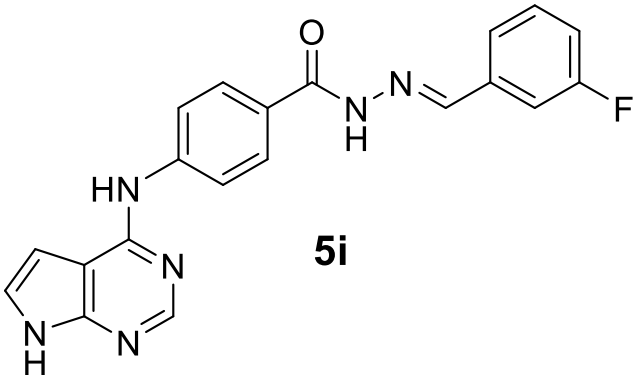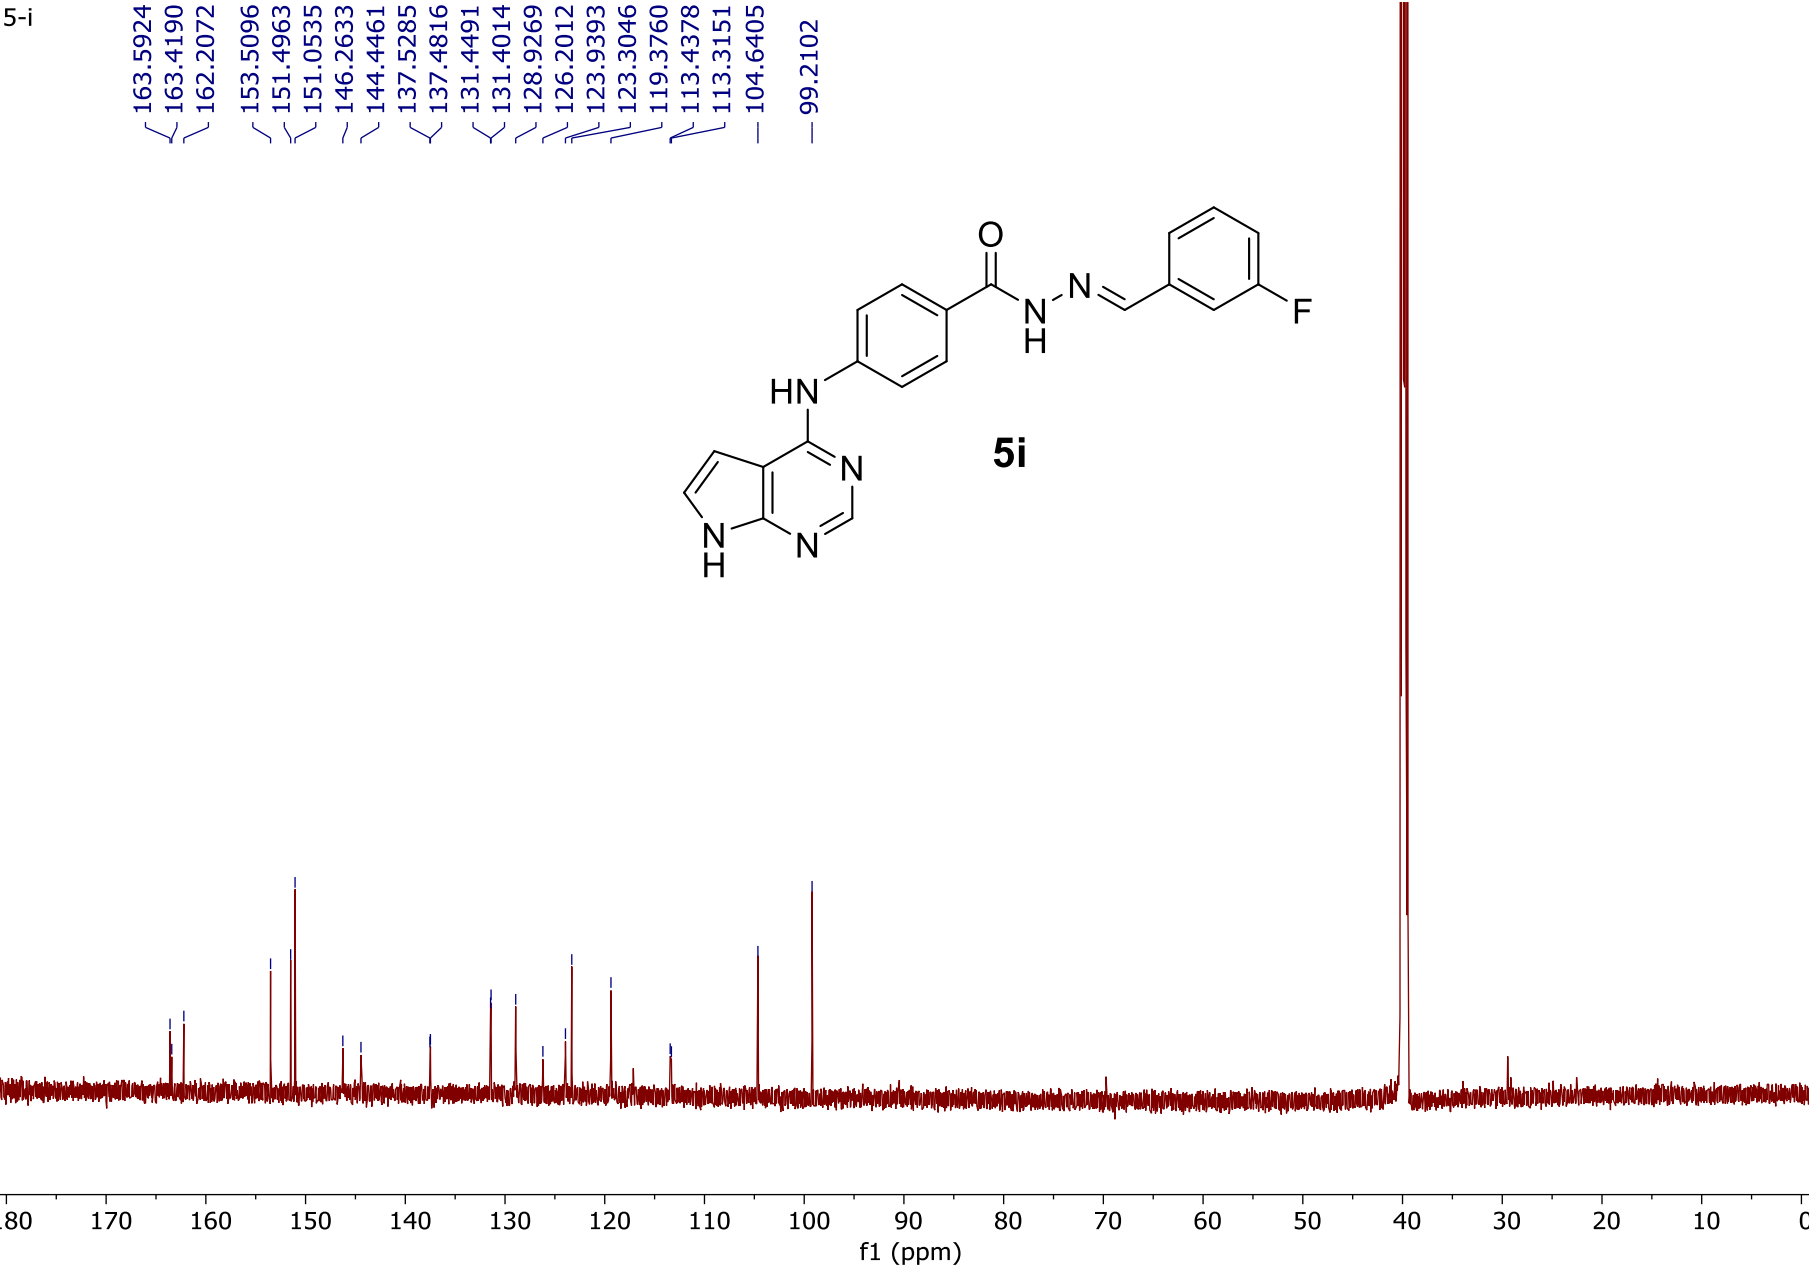

Mass spectra of **5i**

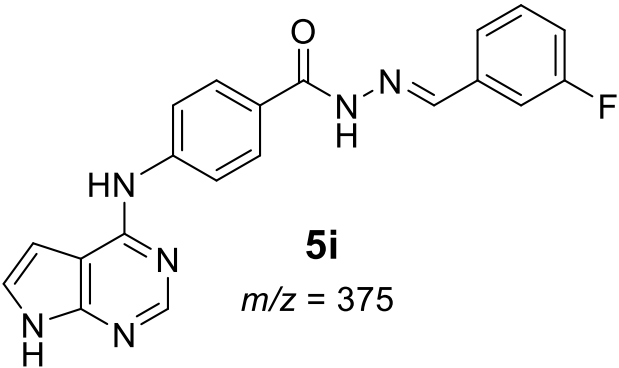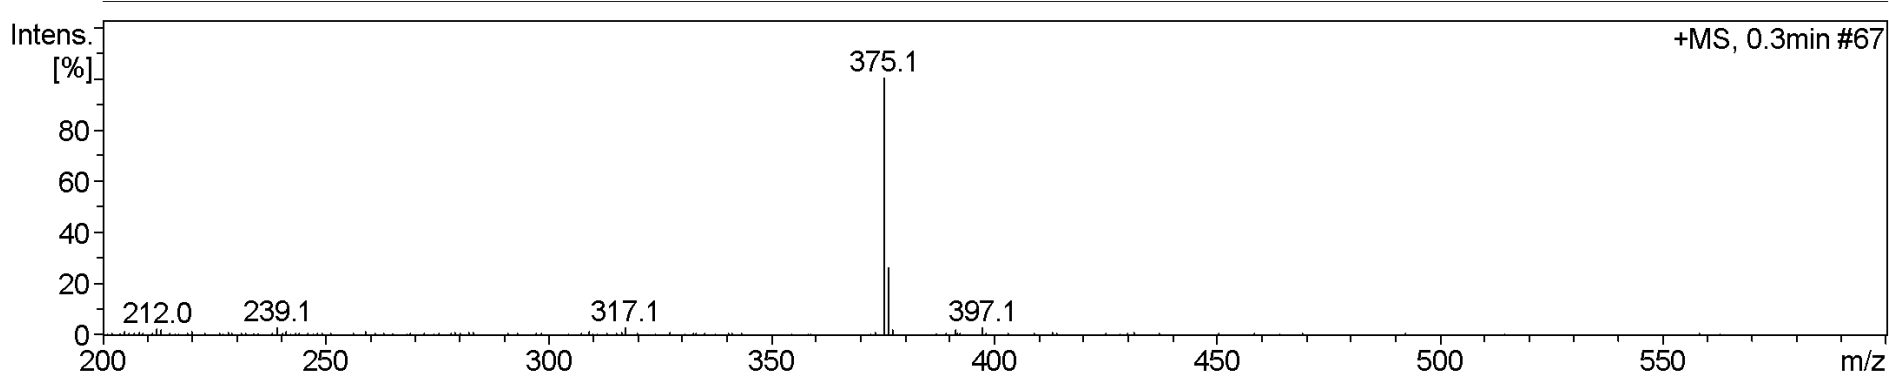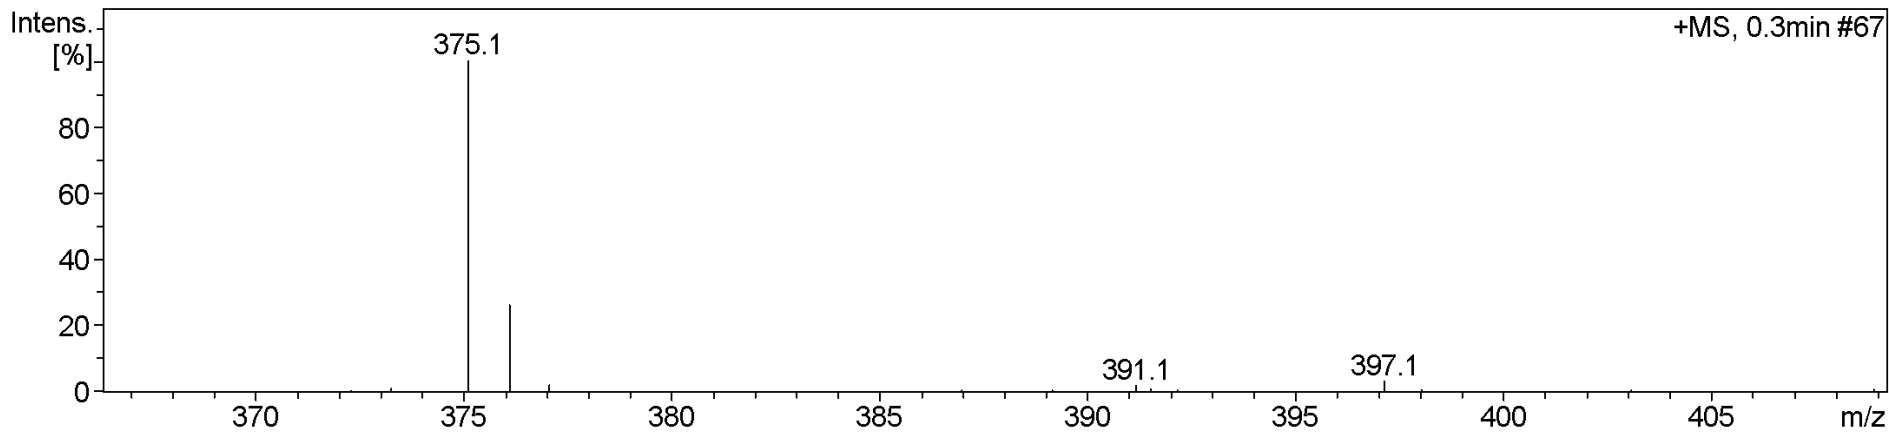

HMRS Mass spectra of **5i**

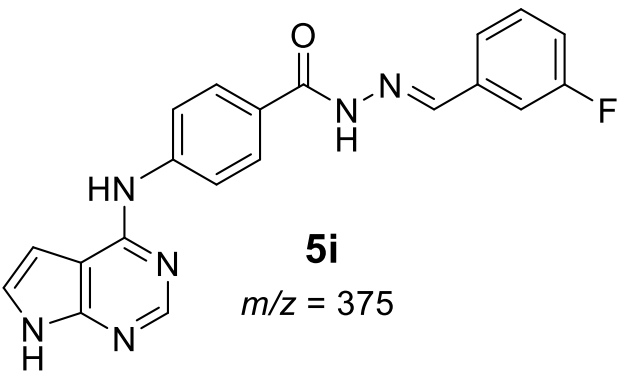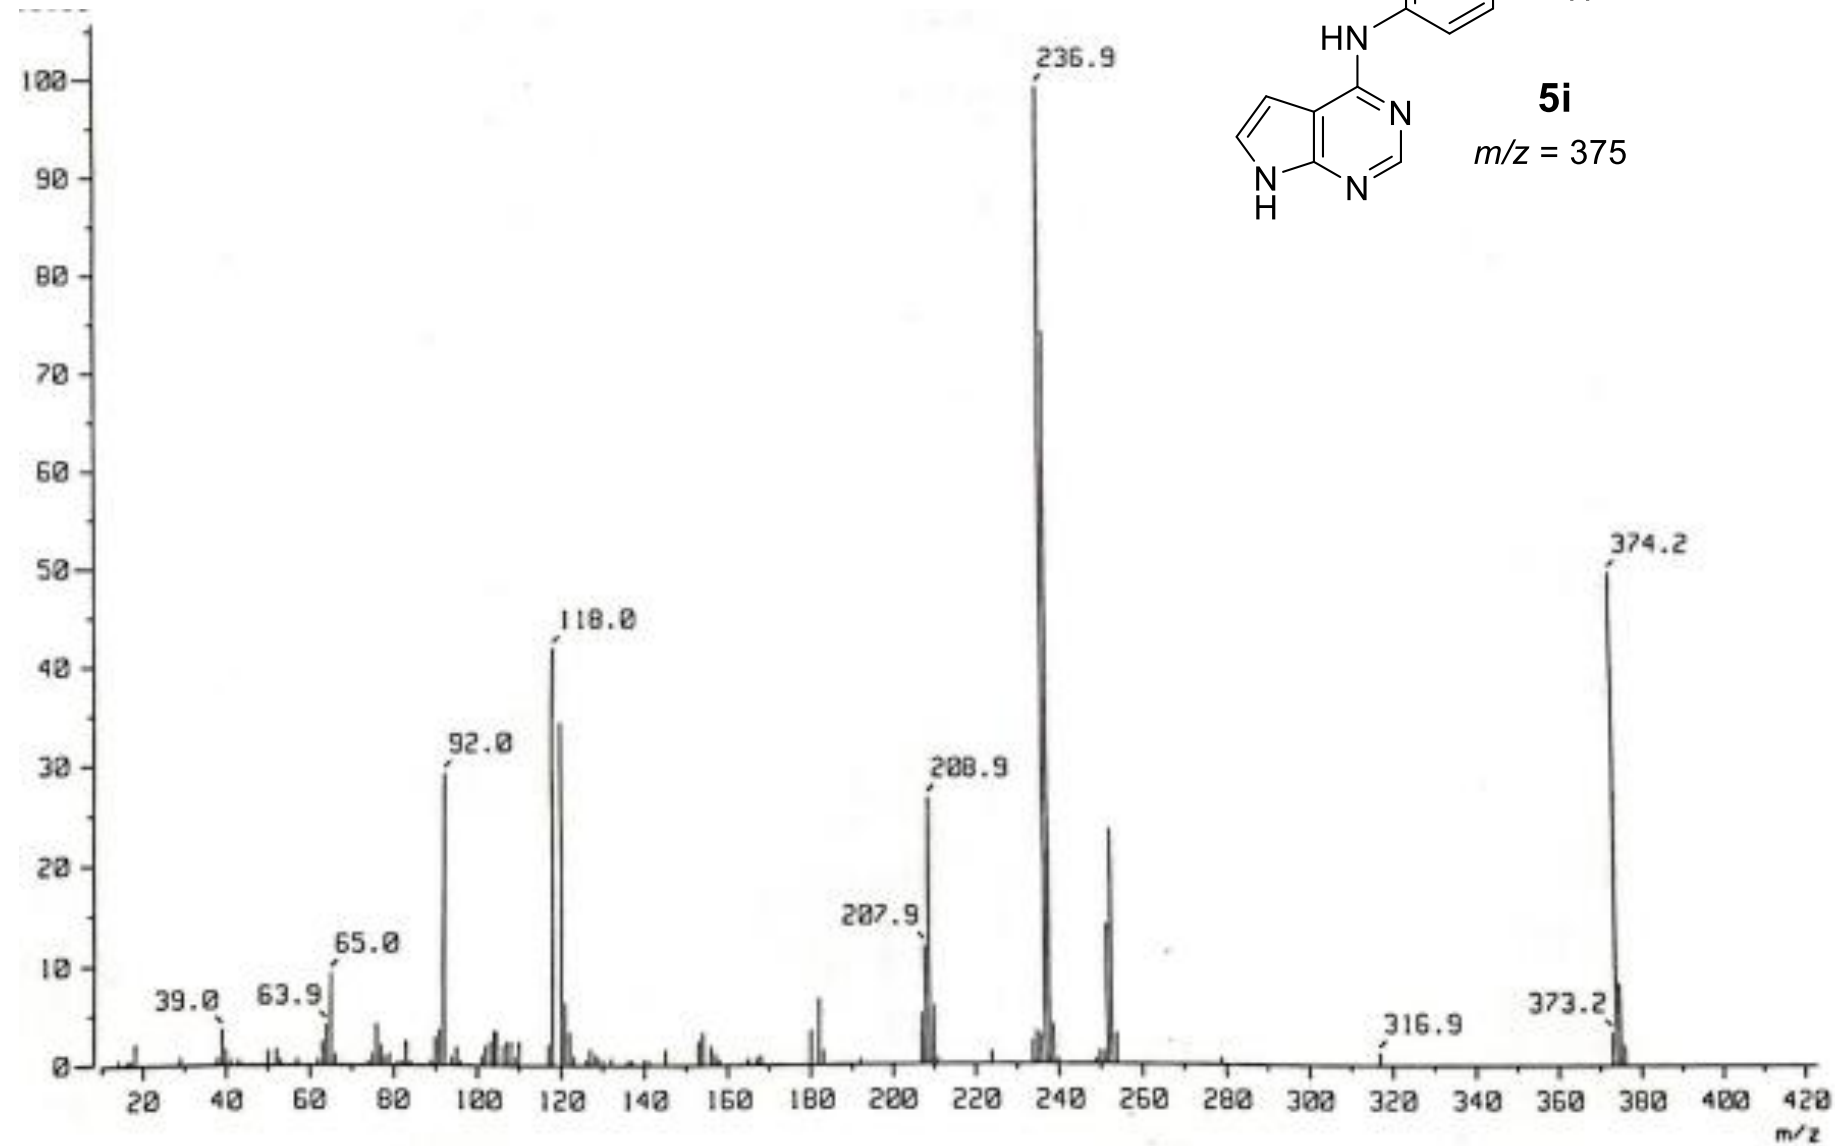



<sup>1</sup>H-NMR spectra of **5j**

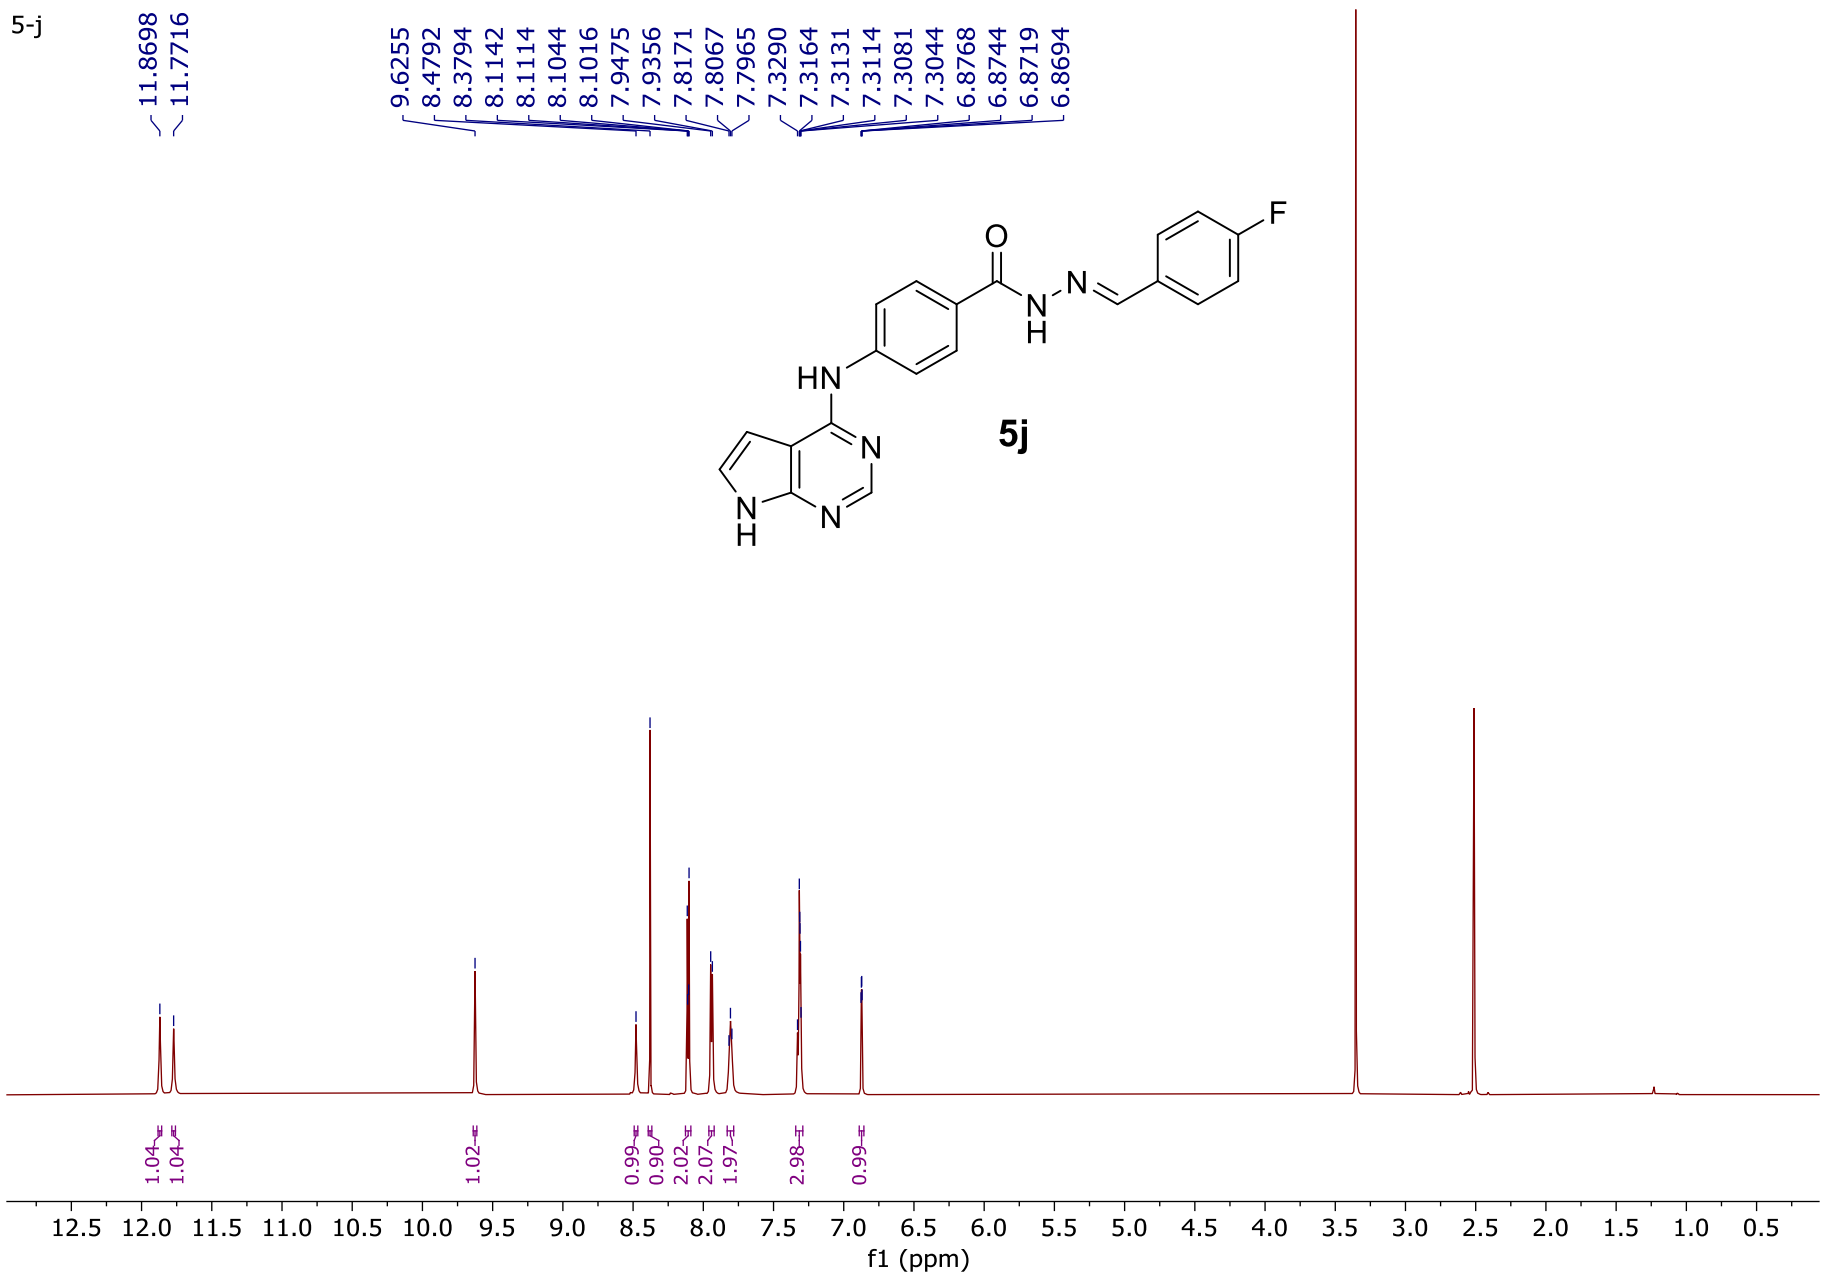

<sup>13</sup>C-NMR spectra of **5j**

5-j

164.2099  
163.2068  
162.8020  
153.5242  
151.5636  
151.0786  
146.4109  
144.3685  
131.6012  
131.5850  
129.6491  
129.6001  
128.8678  
126.4365  
123.2483  
119.3373  
116.4454  
116.3214  
104.6435  
99.1997

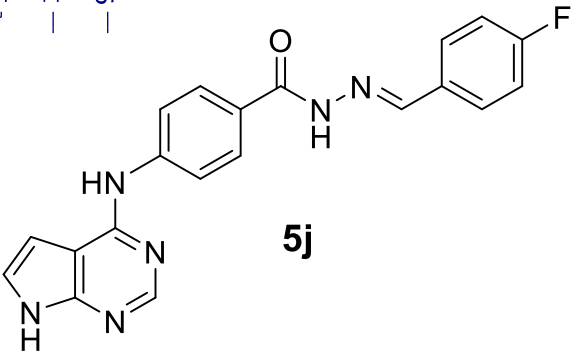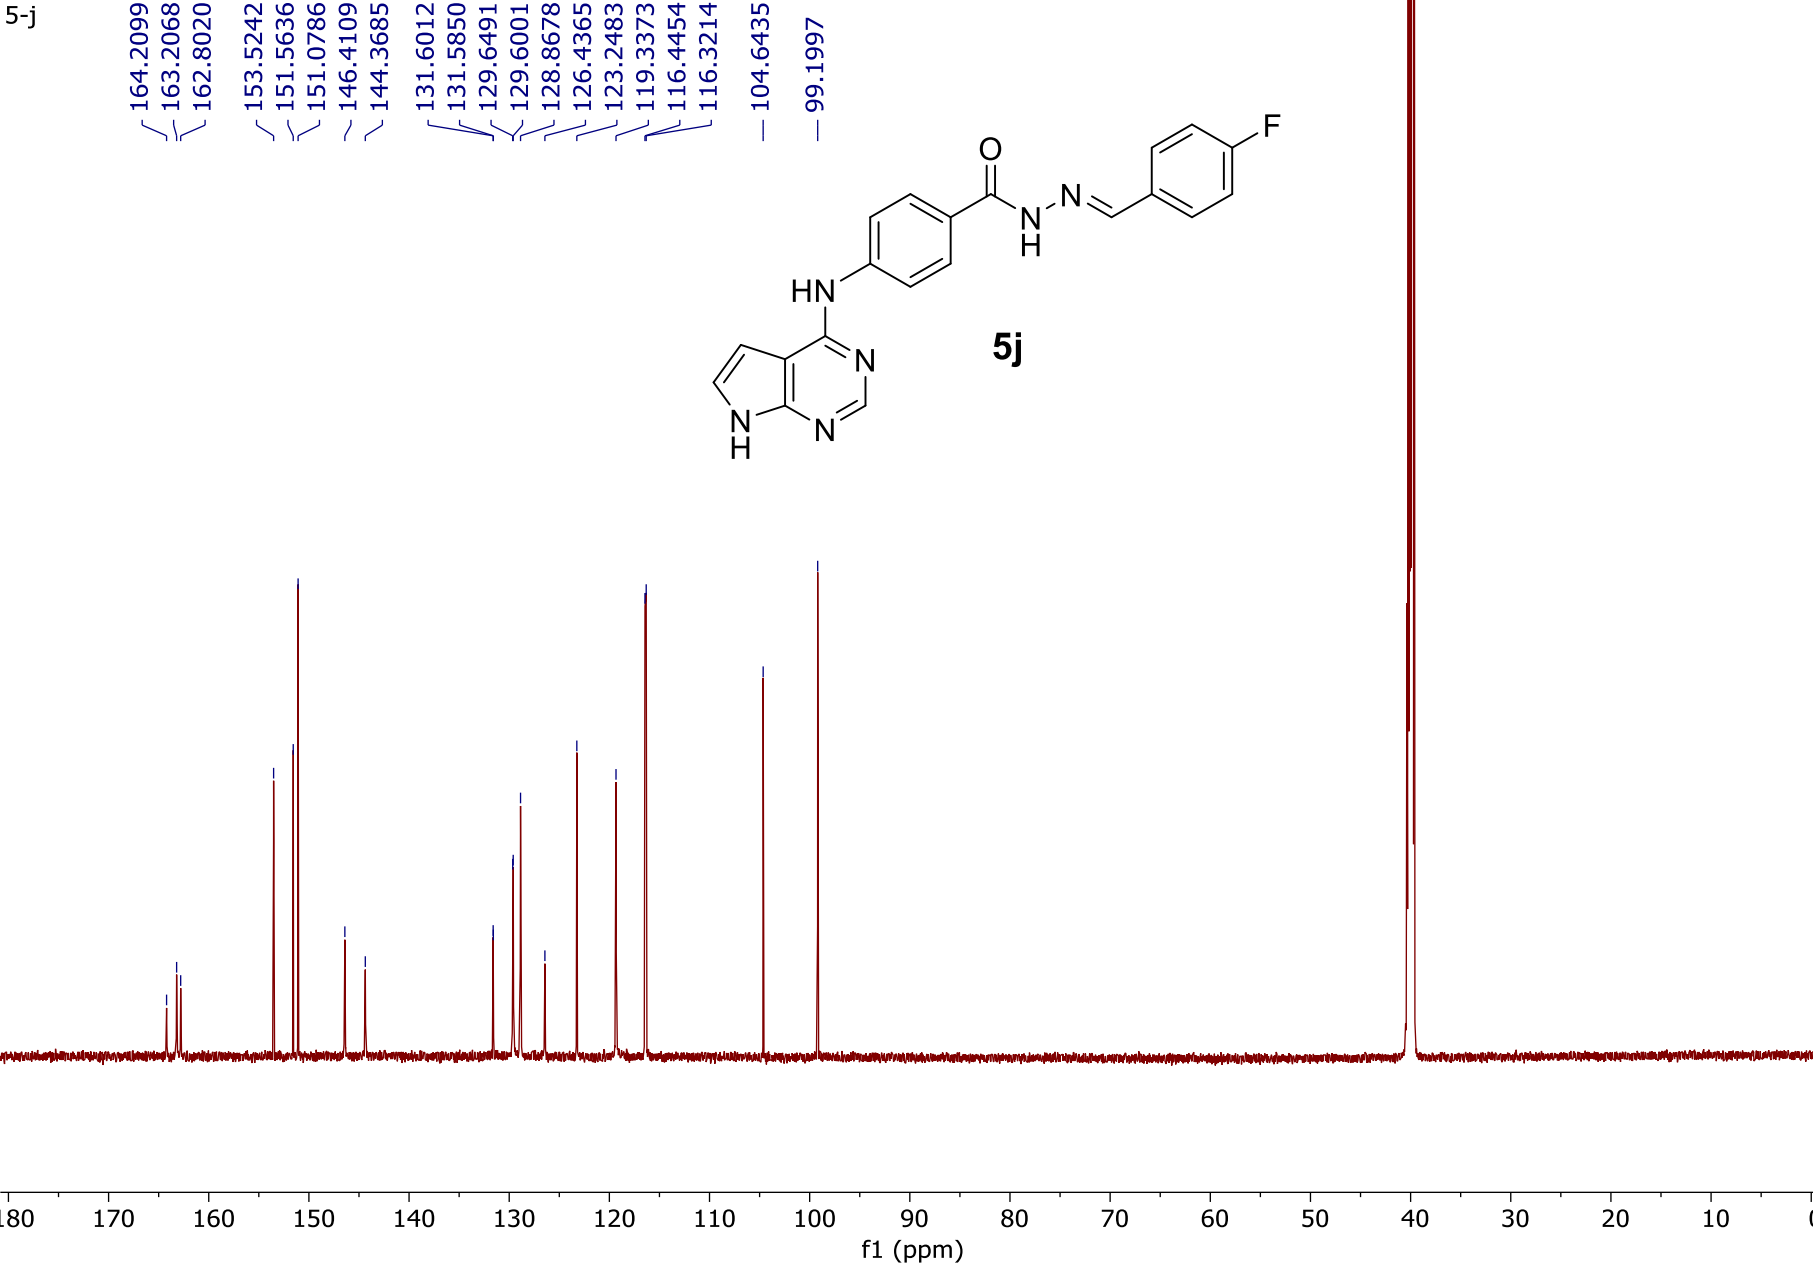

Mass spectra of **5j**

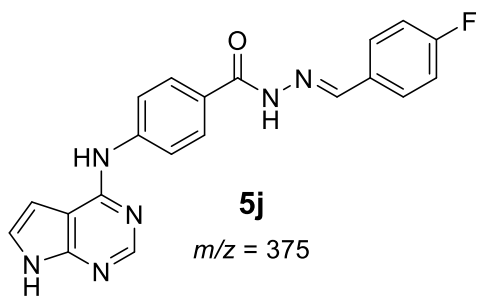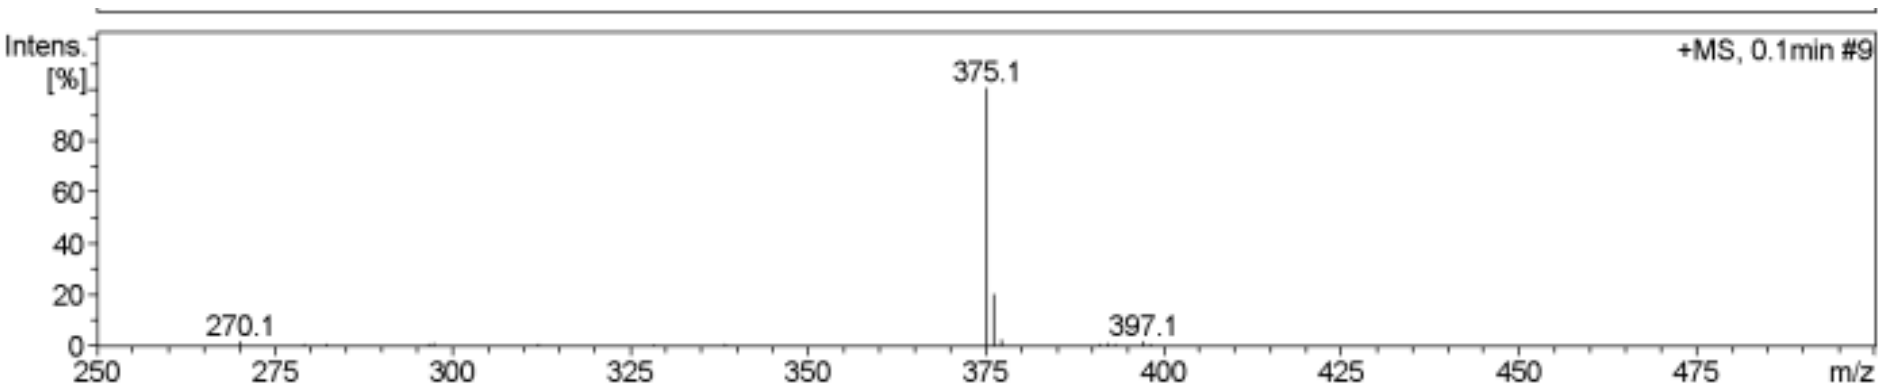

HMRS Mass spectra of **5j**

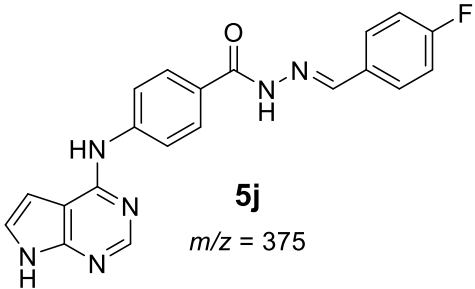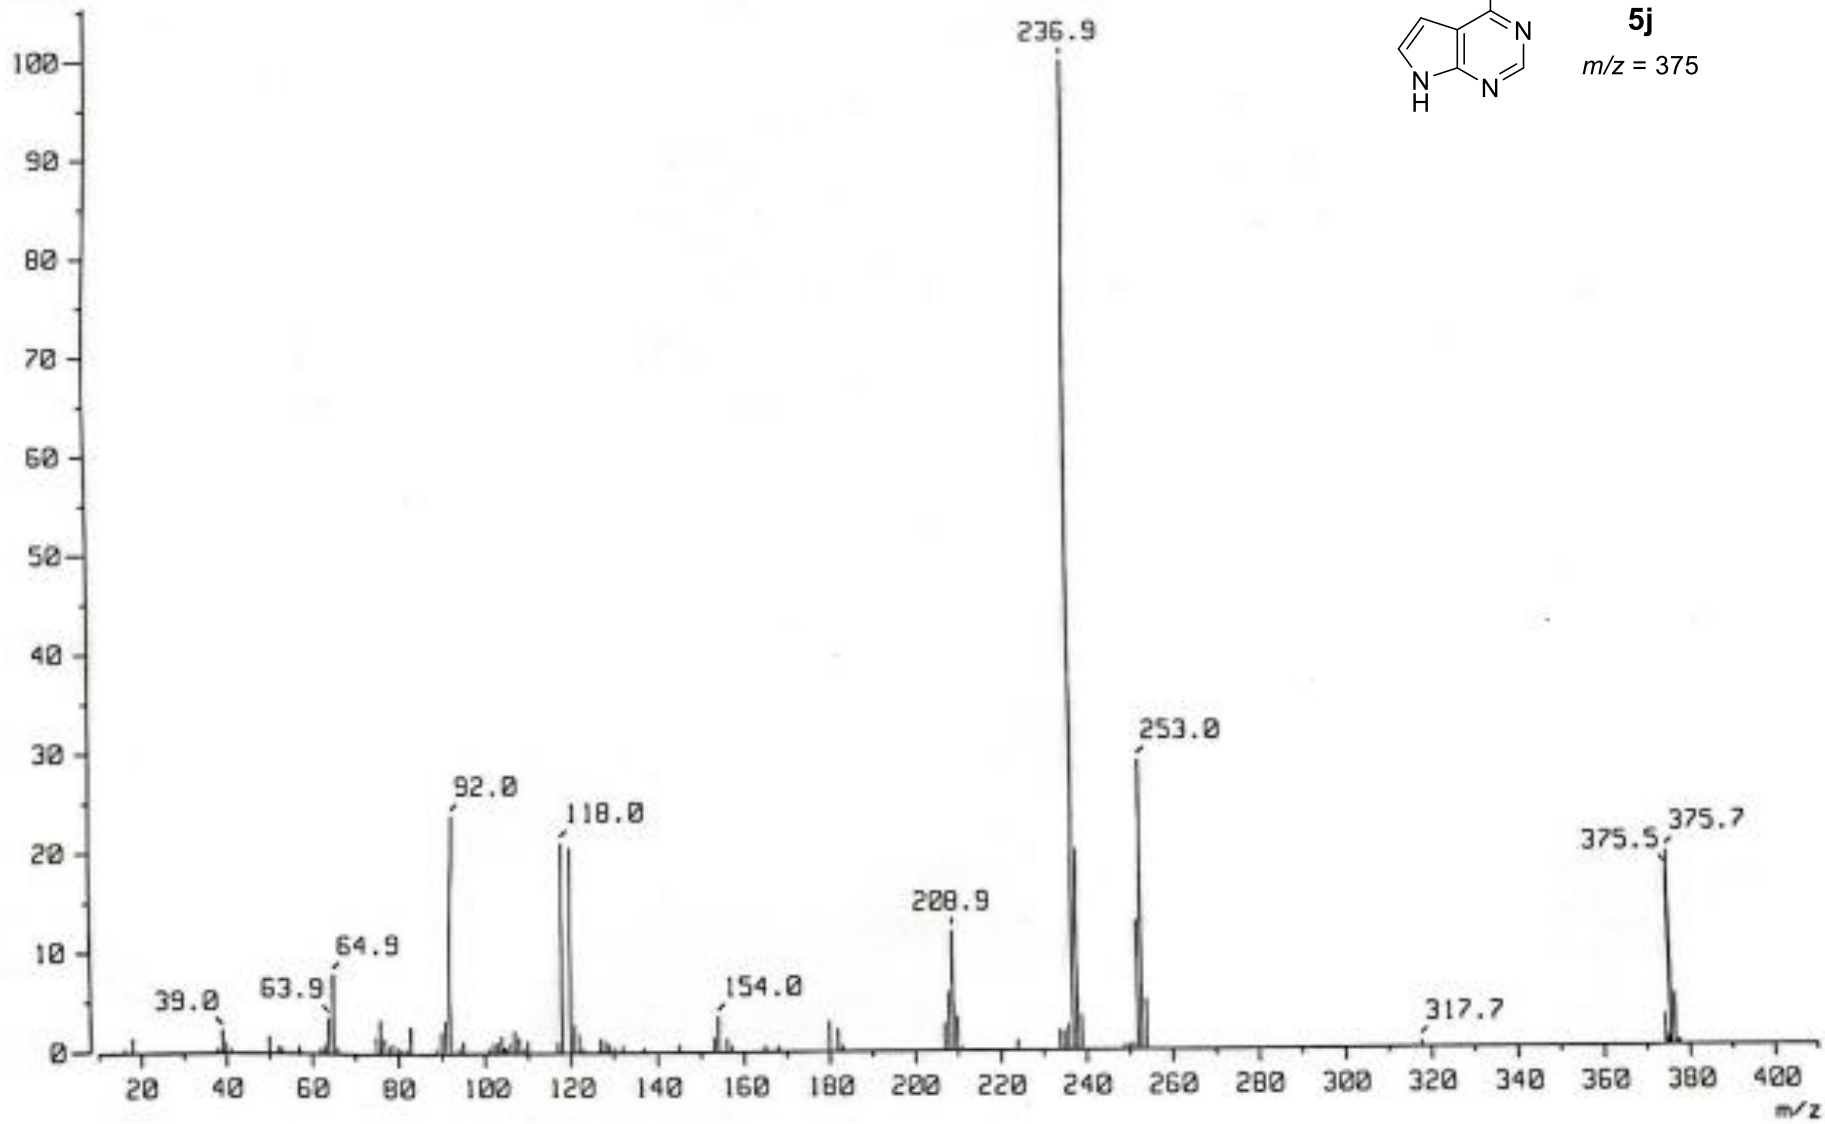

<sup>1</sup>H-NMR spectra of **5k**

5-k

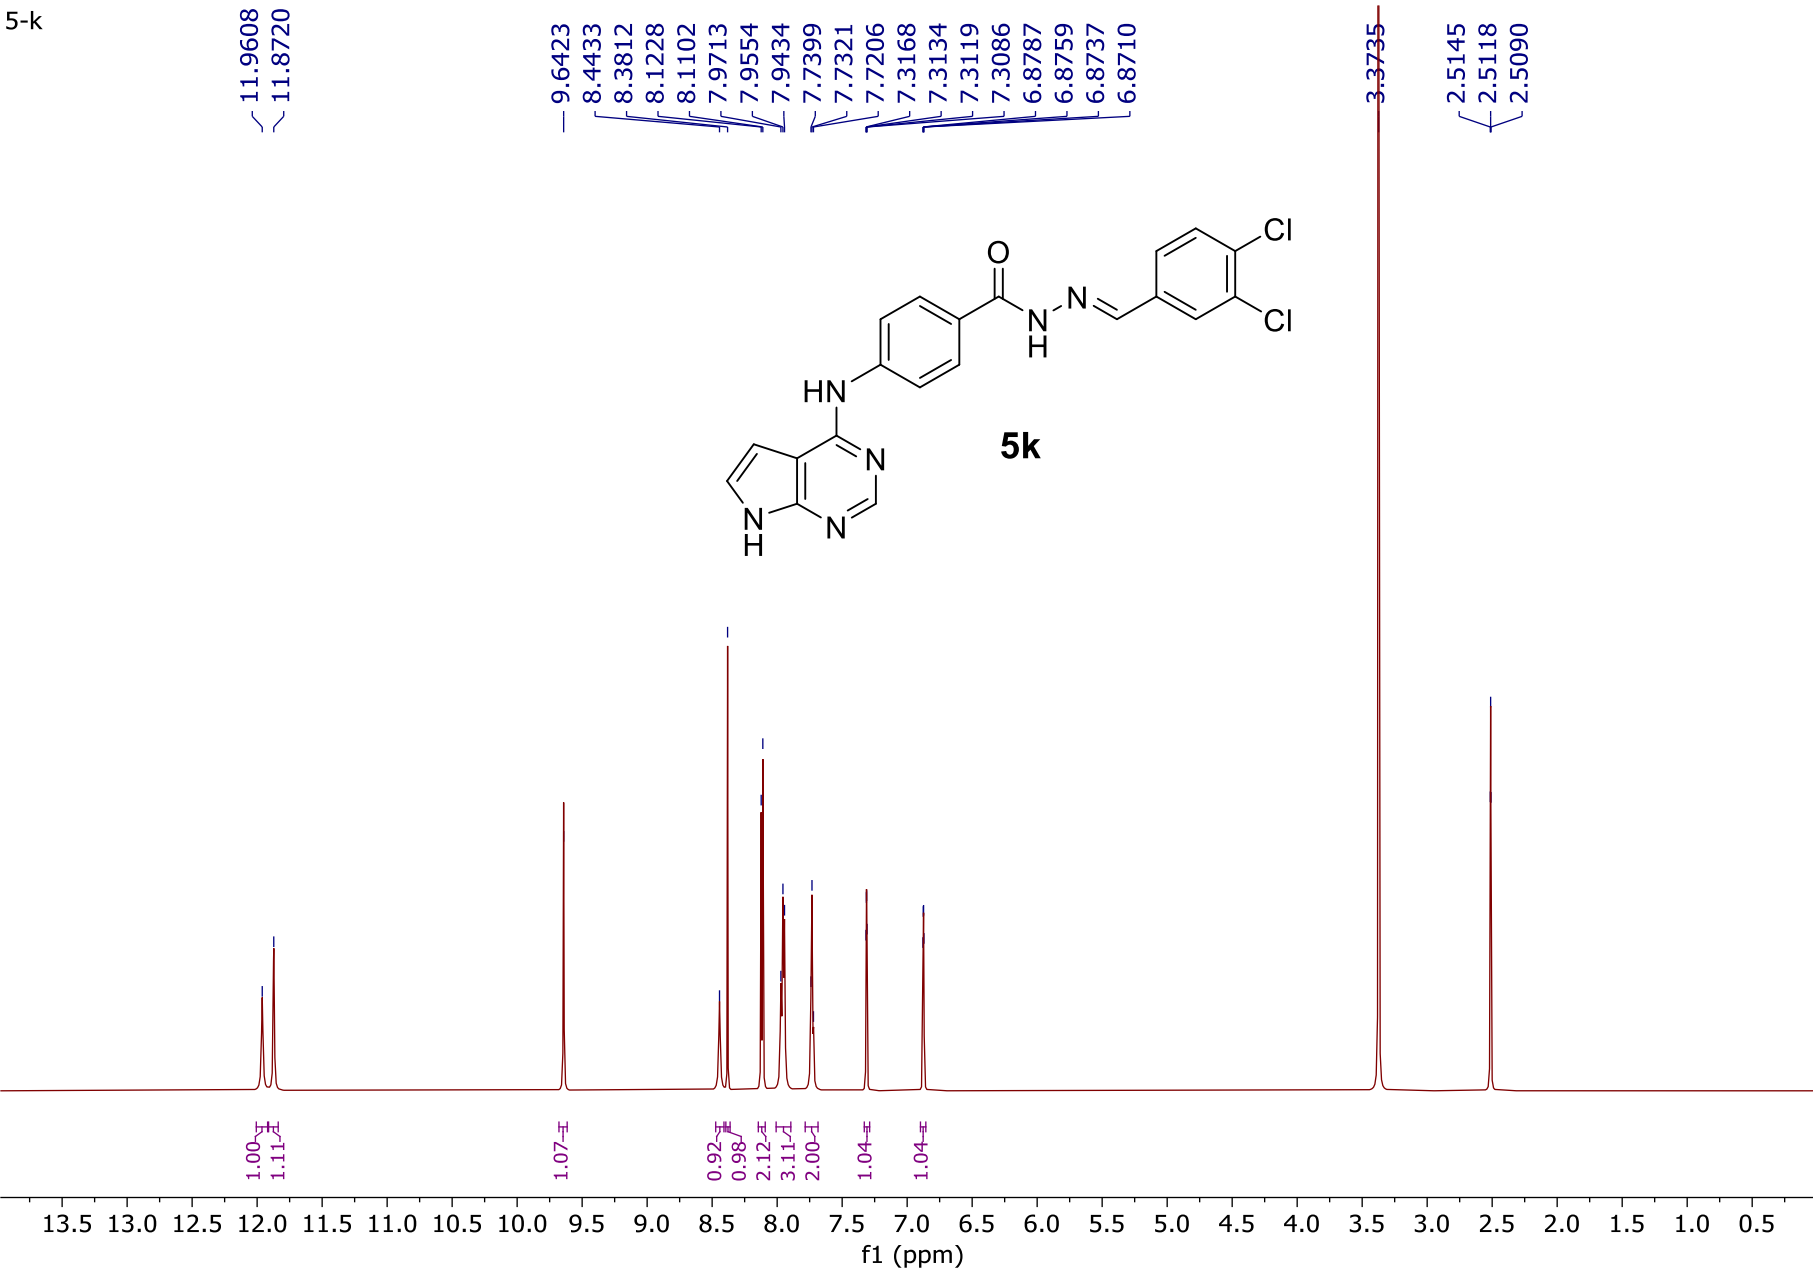

<sup>13</sup>C-NMR spectra of **5k**

5-k  
— 163.3633  
/ 153.5025  
< 151.5706  
< 151.0612  
< 144.7600  
< 144.5335  
/ 135.8485  
/ 132.5278  
/ 132.1878  
/ 131.5715  
/ 128.9846  
/ 128.8561  
/ 127.3032  
/ 126.1506  
/ 123.2711  
/ 119.3206

— 104.6712  
— 99.2029

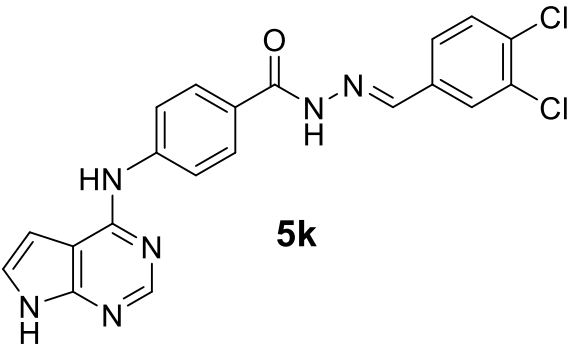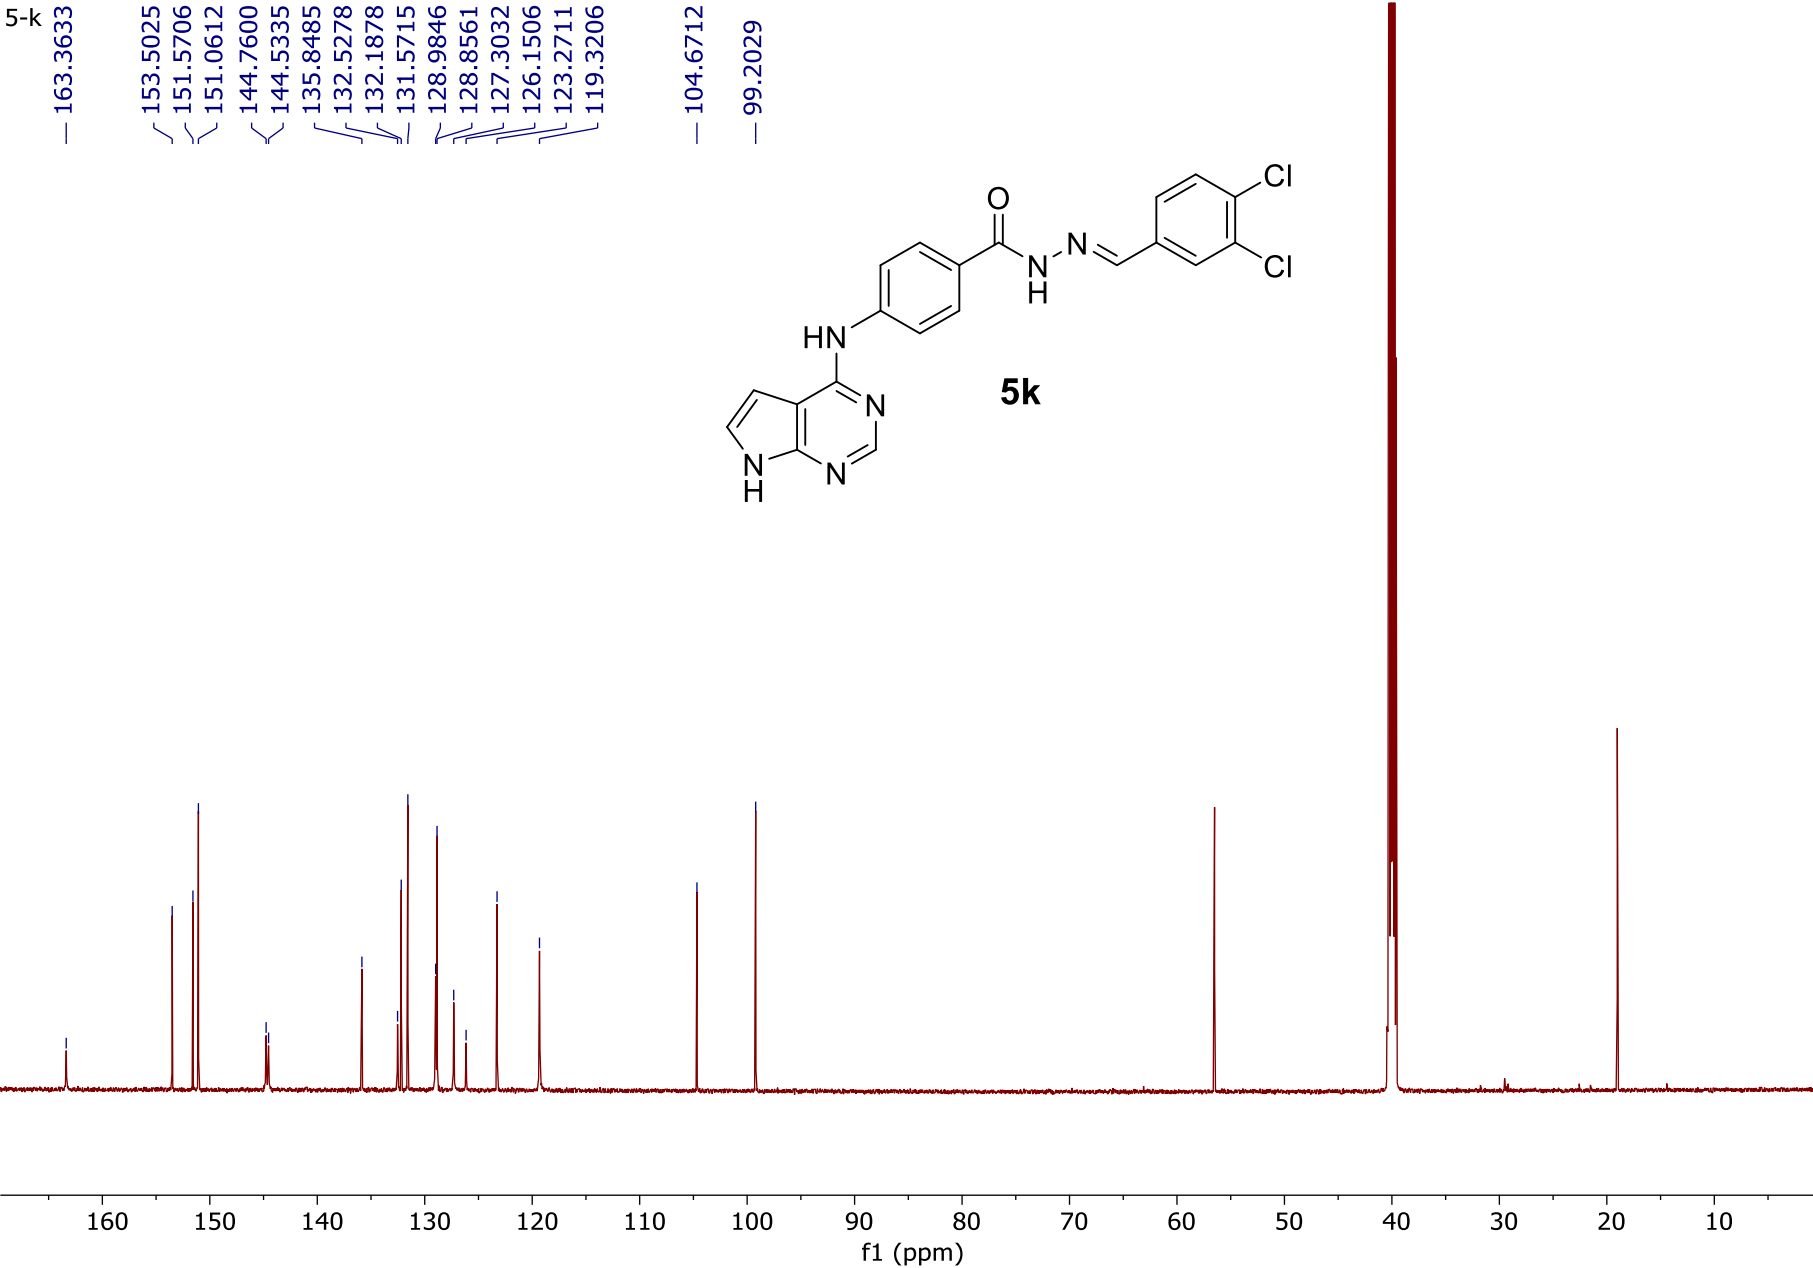

Mass spectra of **5k**

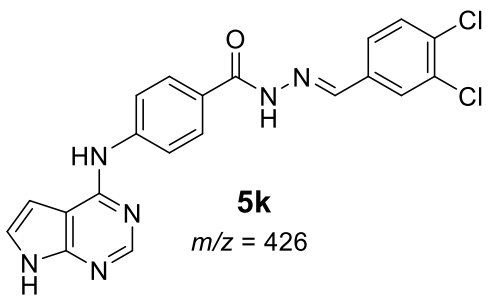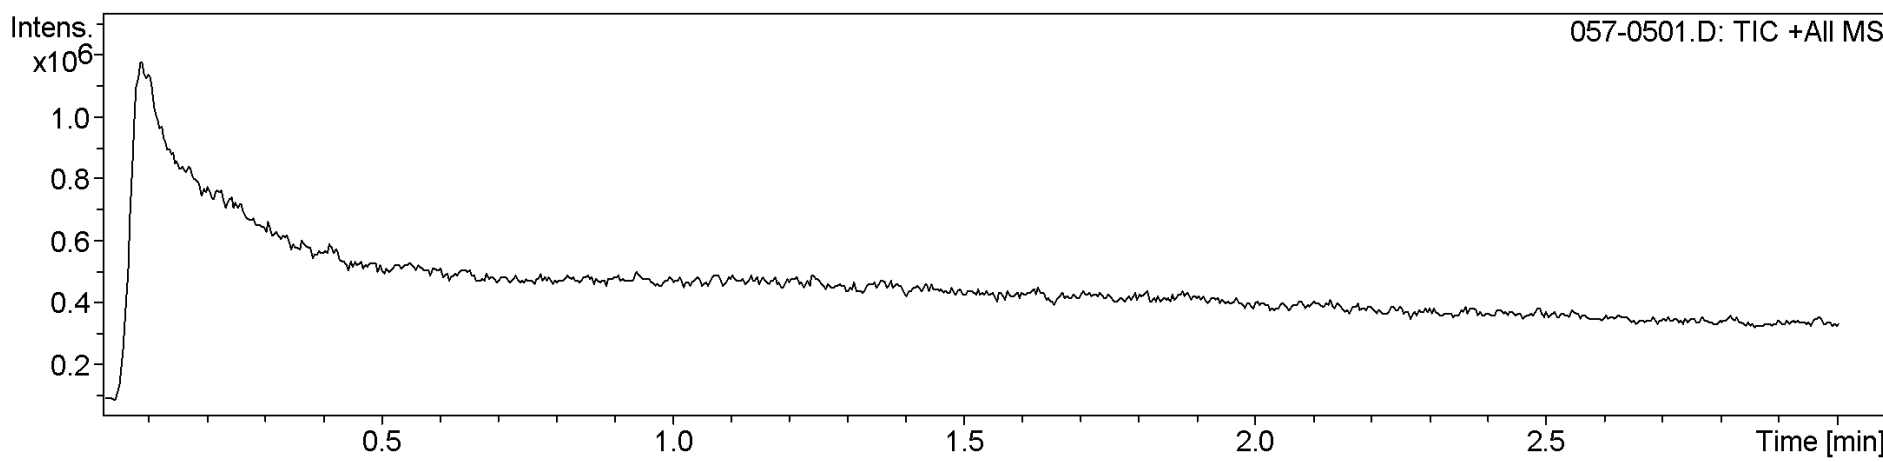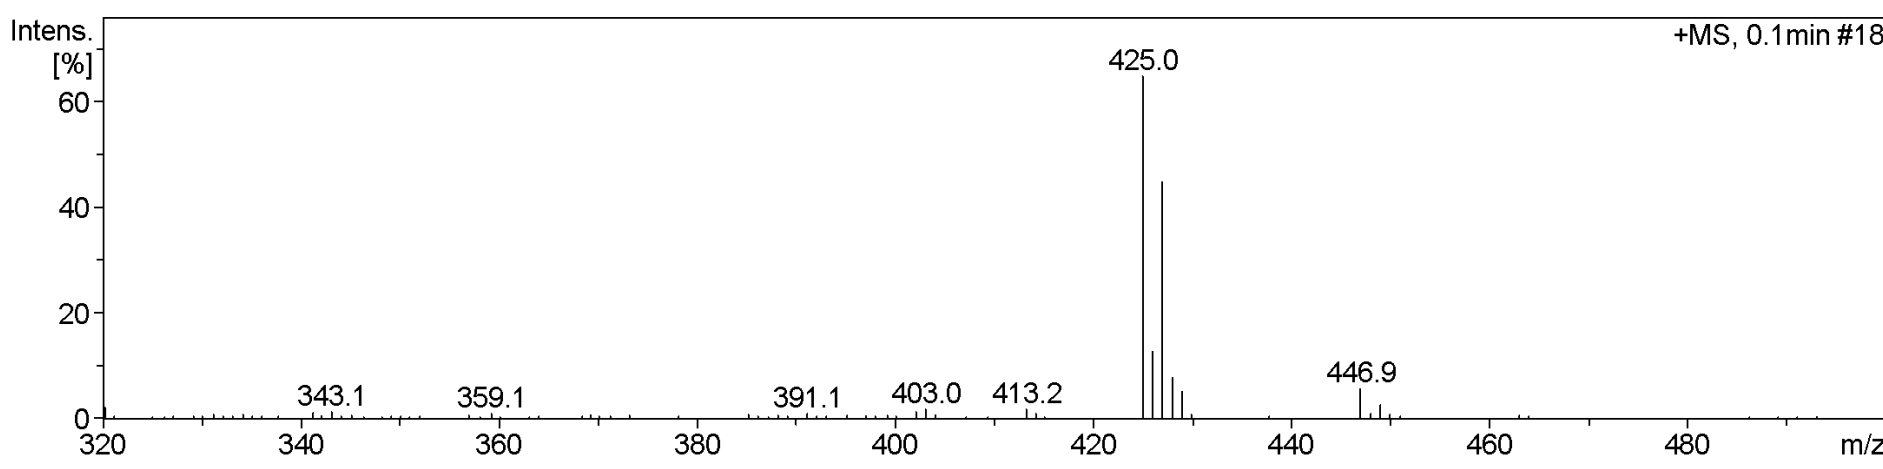

HMRS Mass spectra of **5k**

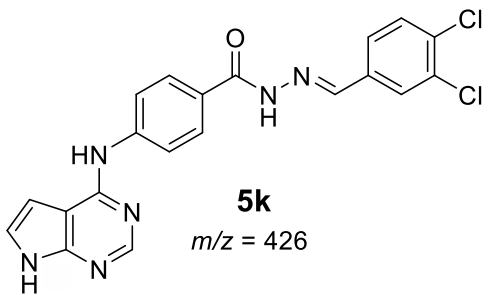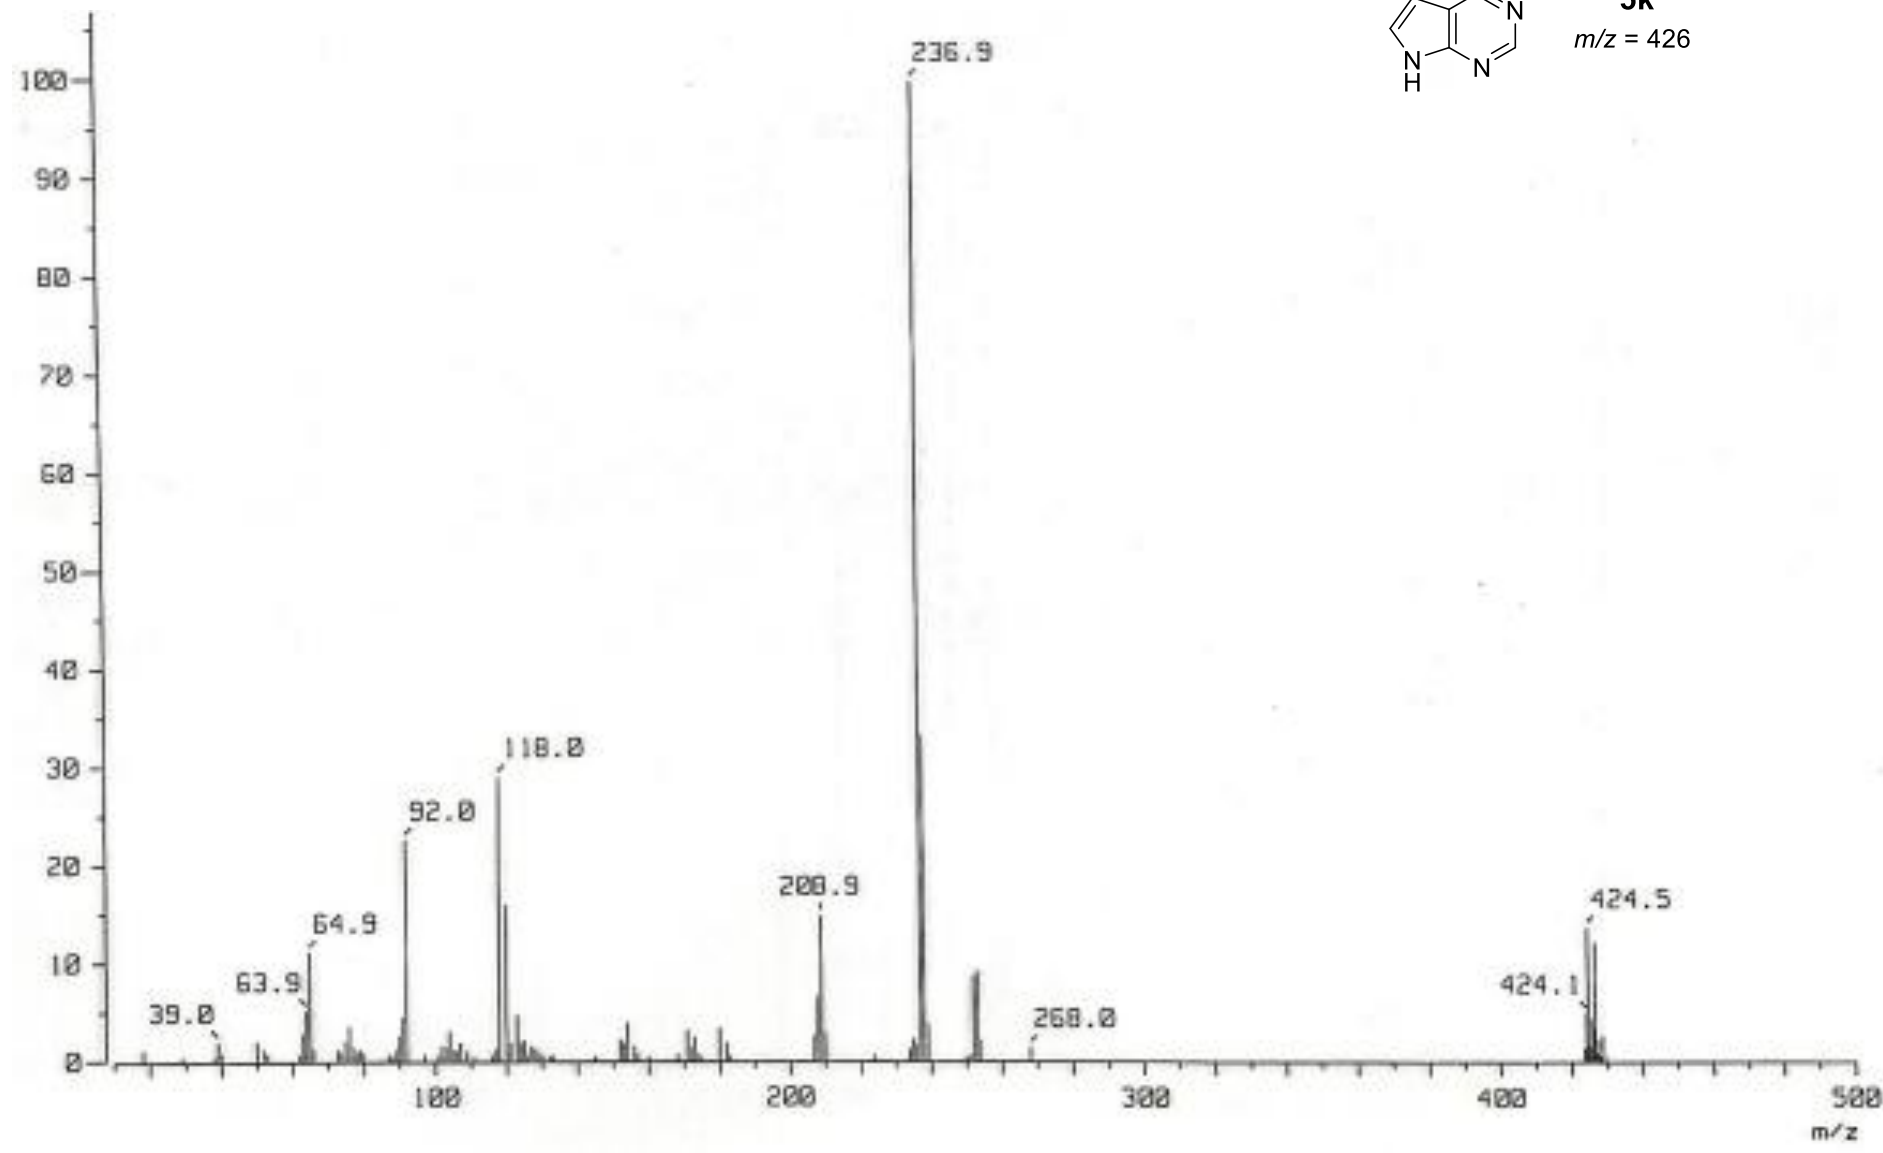



<sup>1</sup>H-NMR spectra of **5I**

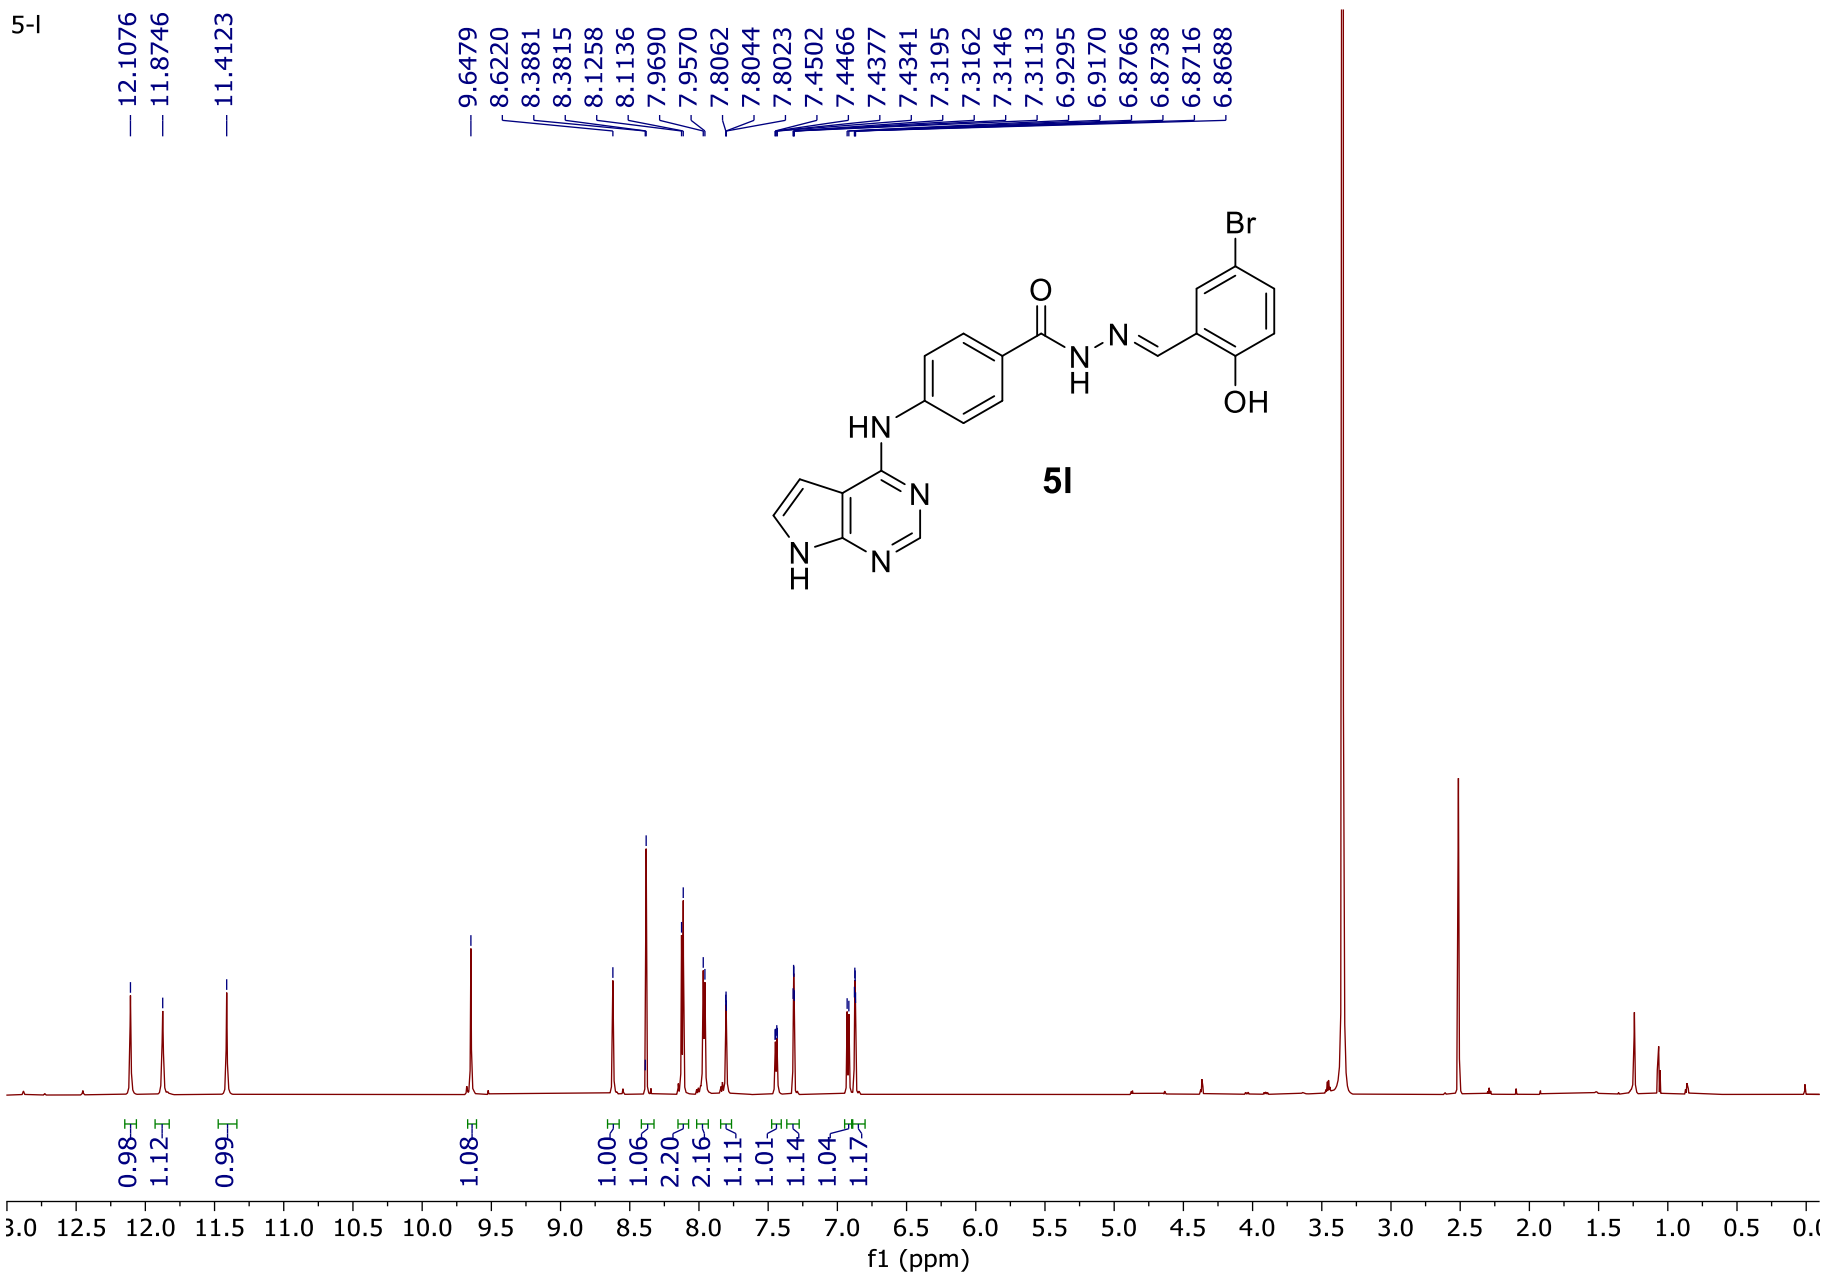

<sup>13</sup>C-NMR spectra of **5I**

5-I

- 163.0245
- 156.8998
- 153.4851
- 151.5819
- 151.0645
- 145.5910
- 144.6455
- 133.8824
- 131.0344
- 128.9860
- 125.6938
- 123.3054
- 121.8496
- 119.3388
- 119.1626
- 110.8815
- 104.6804
- 99.1962

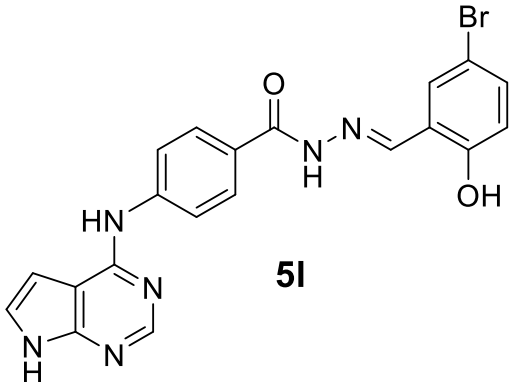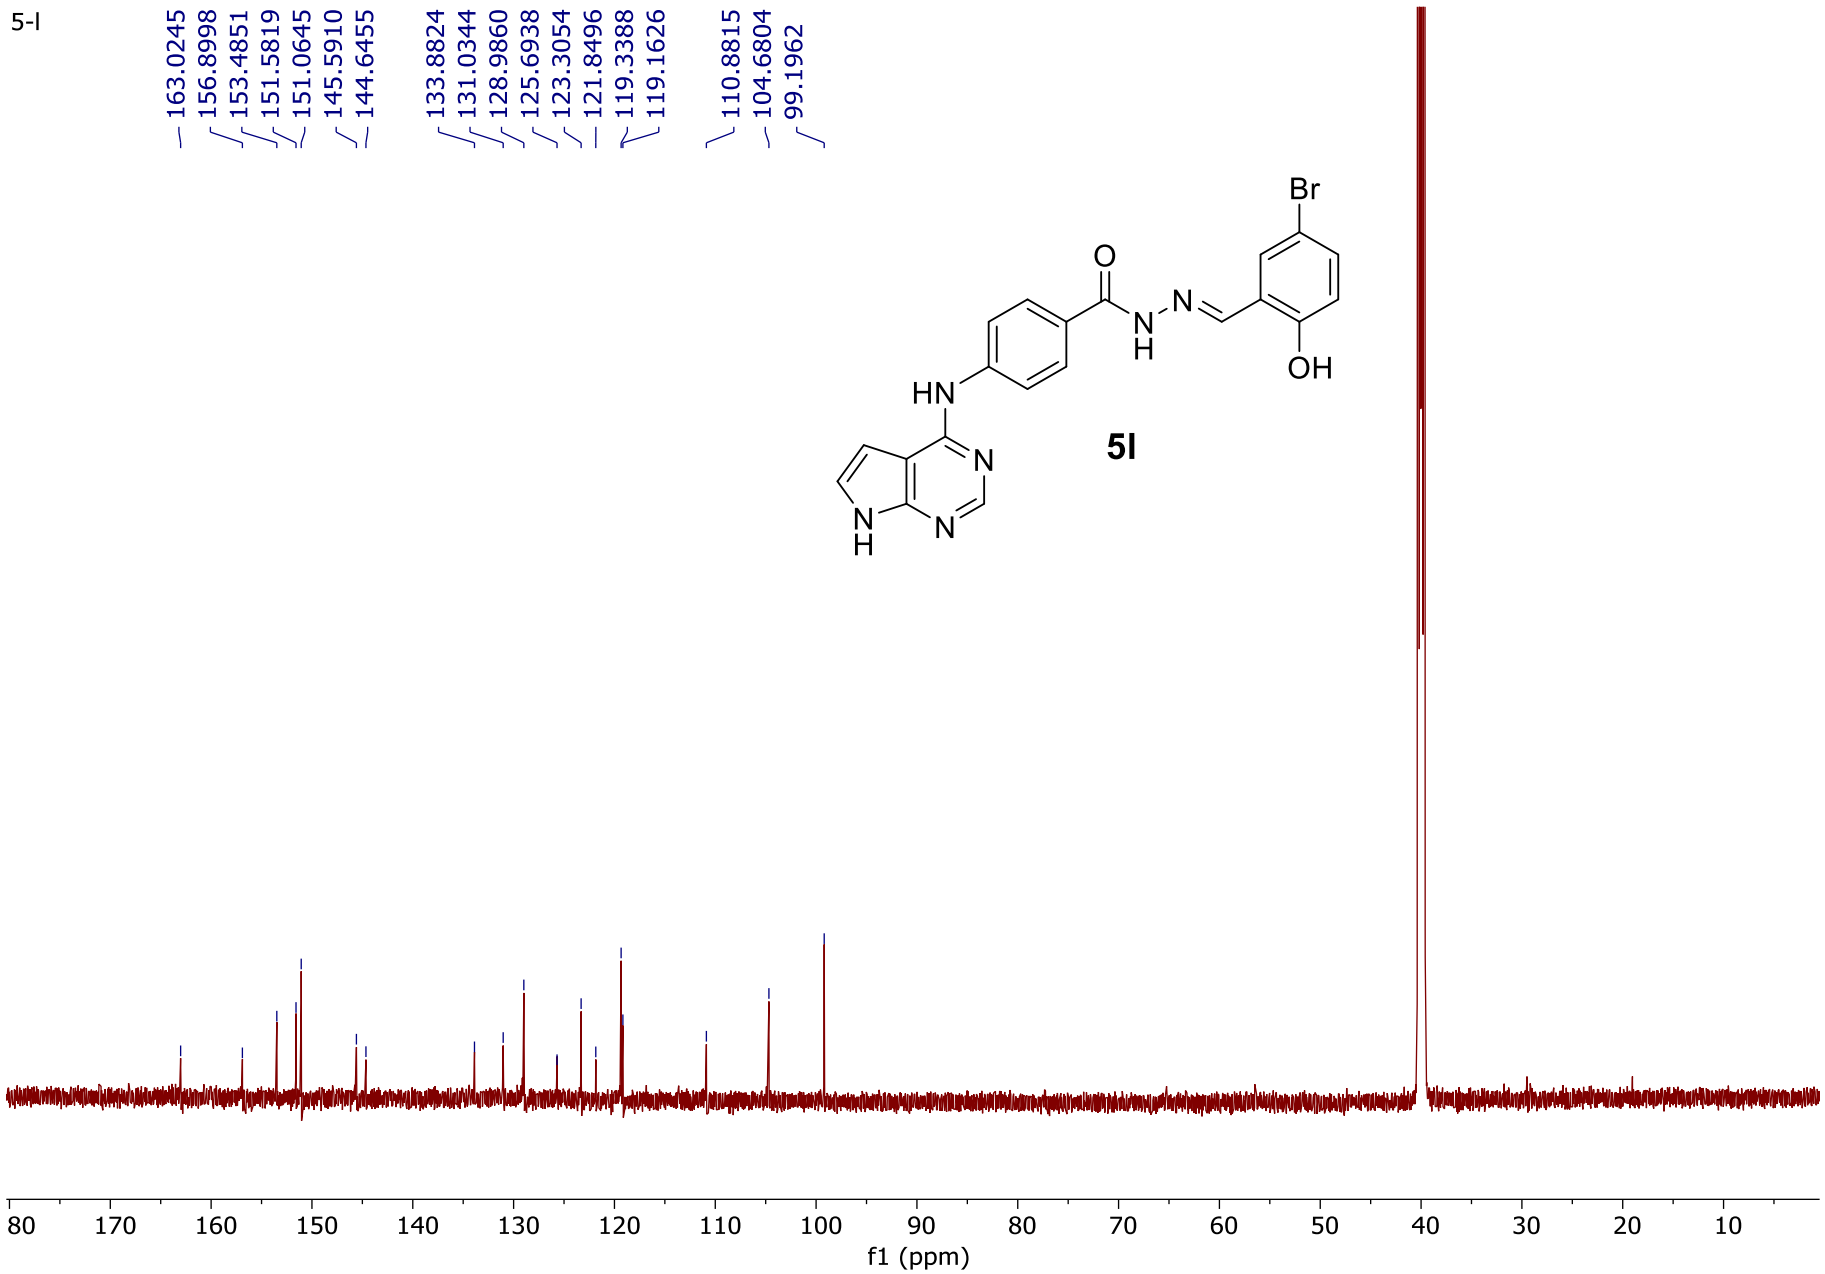

Mass spectra of **5l**

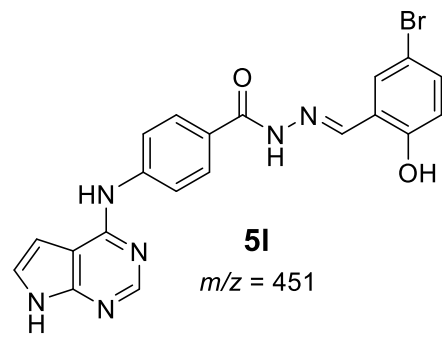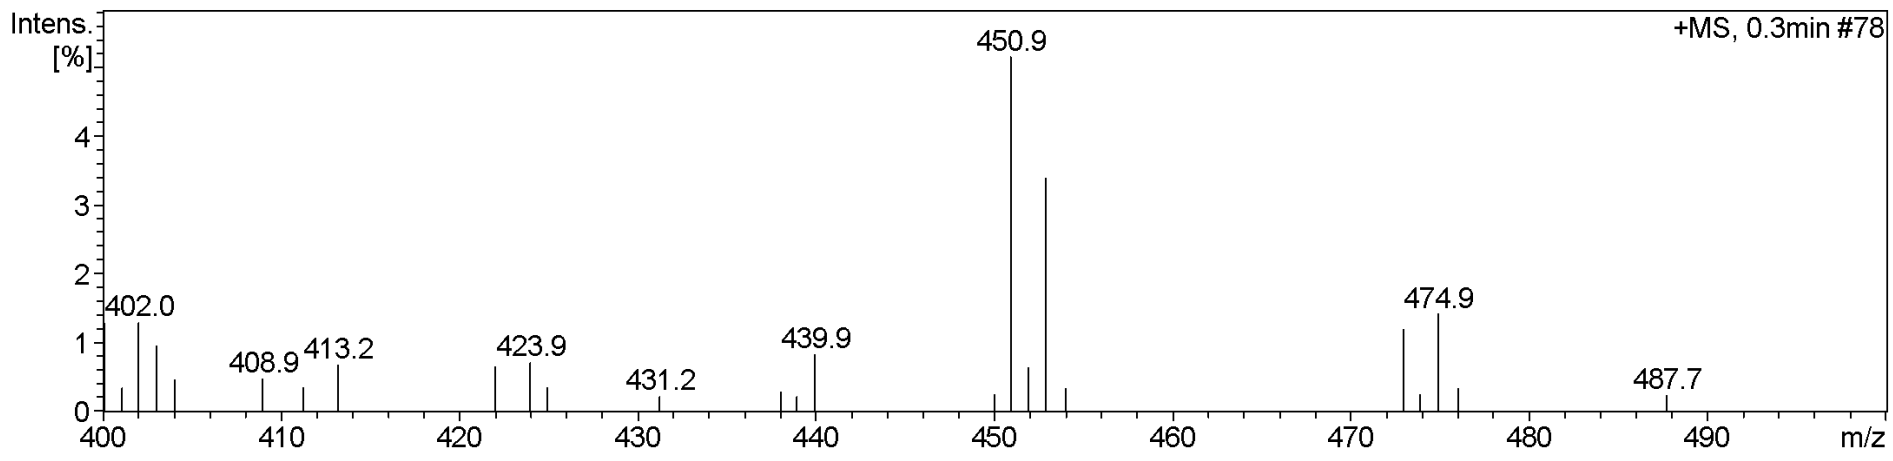

HMRS Mass spectra of **5l**

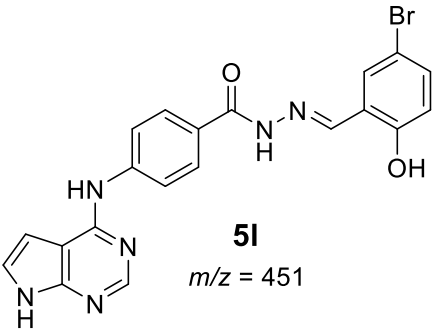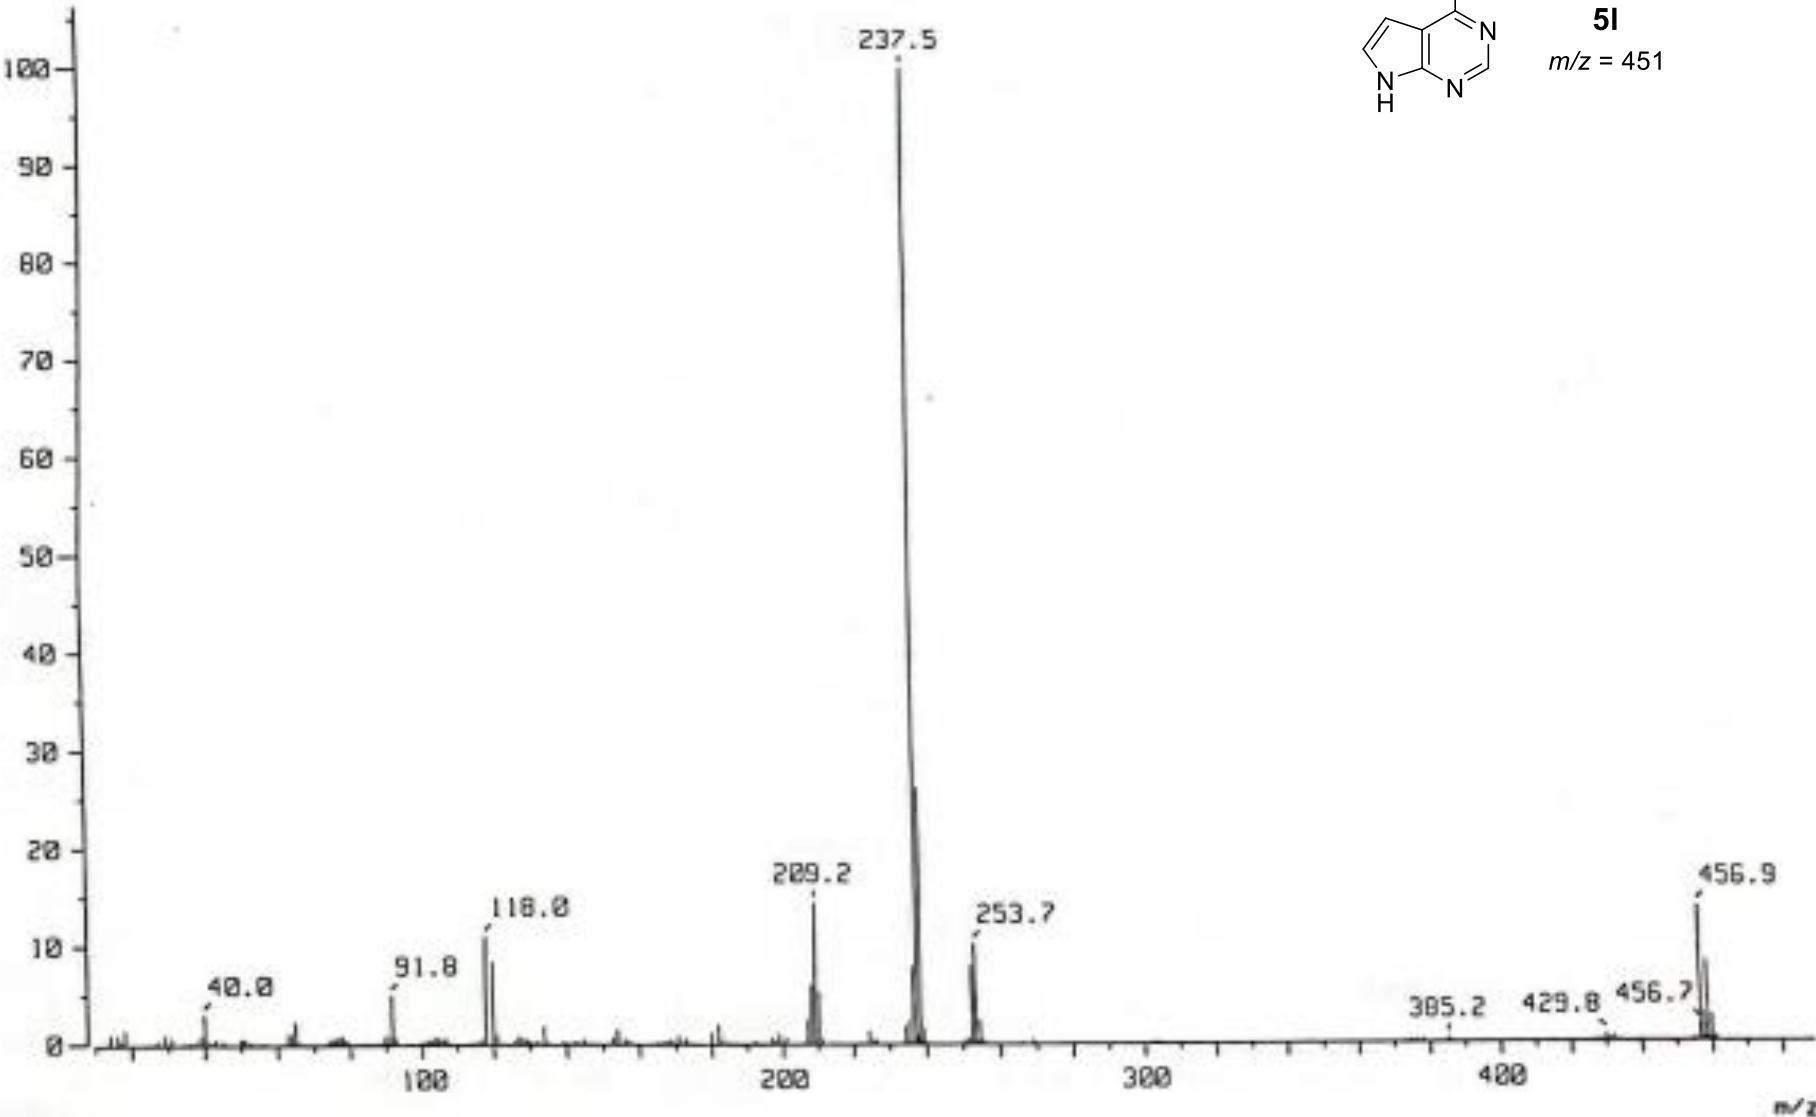

<sup>1</sup>H-NMR spectra of **5m**

5-m

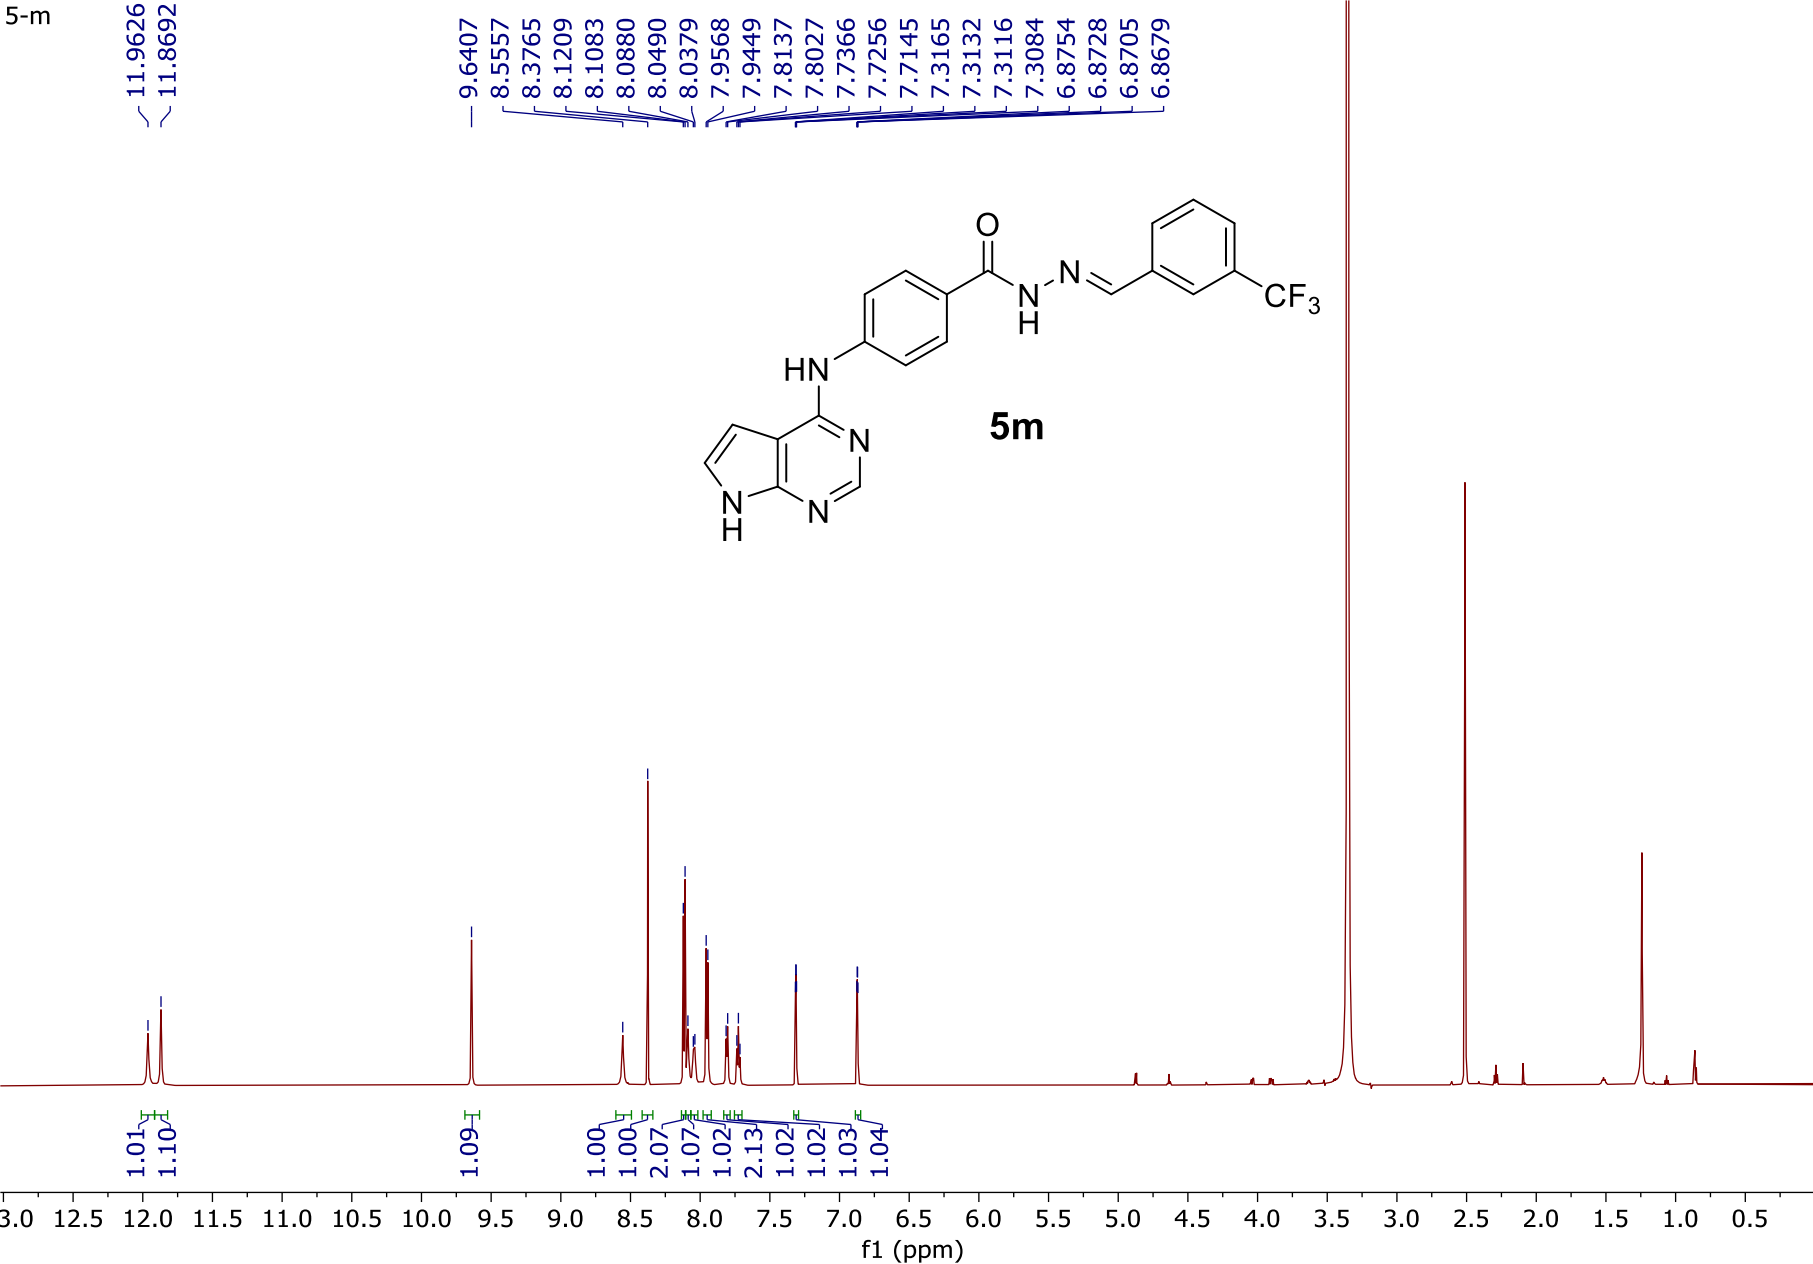

<sup>13</sup>C-NMR spectra of **5m**

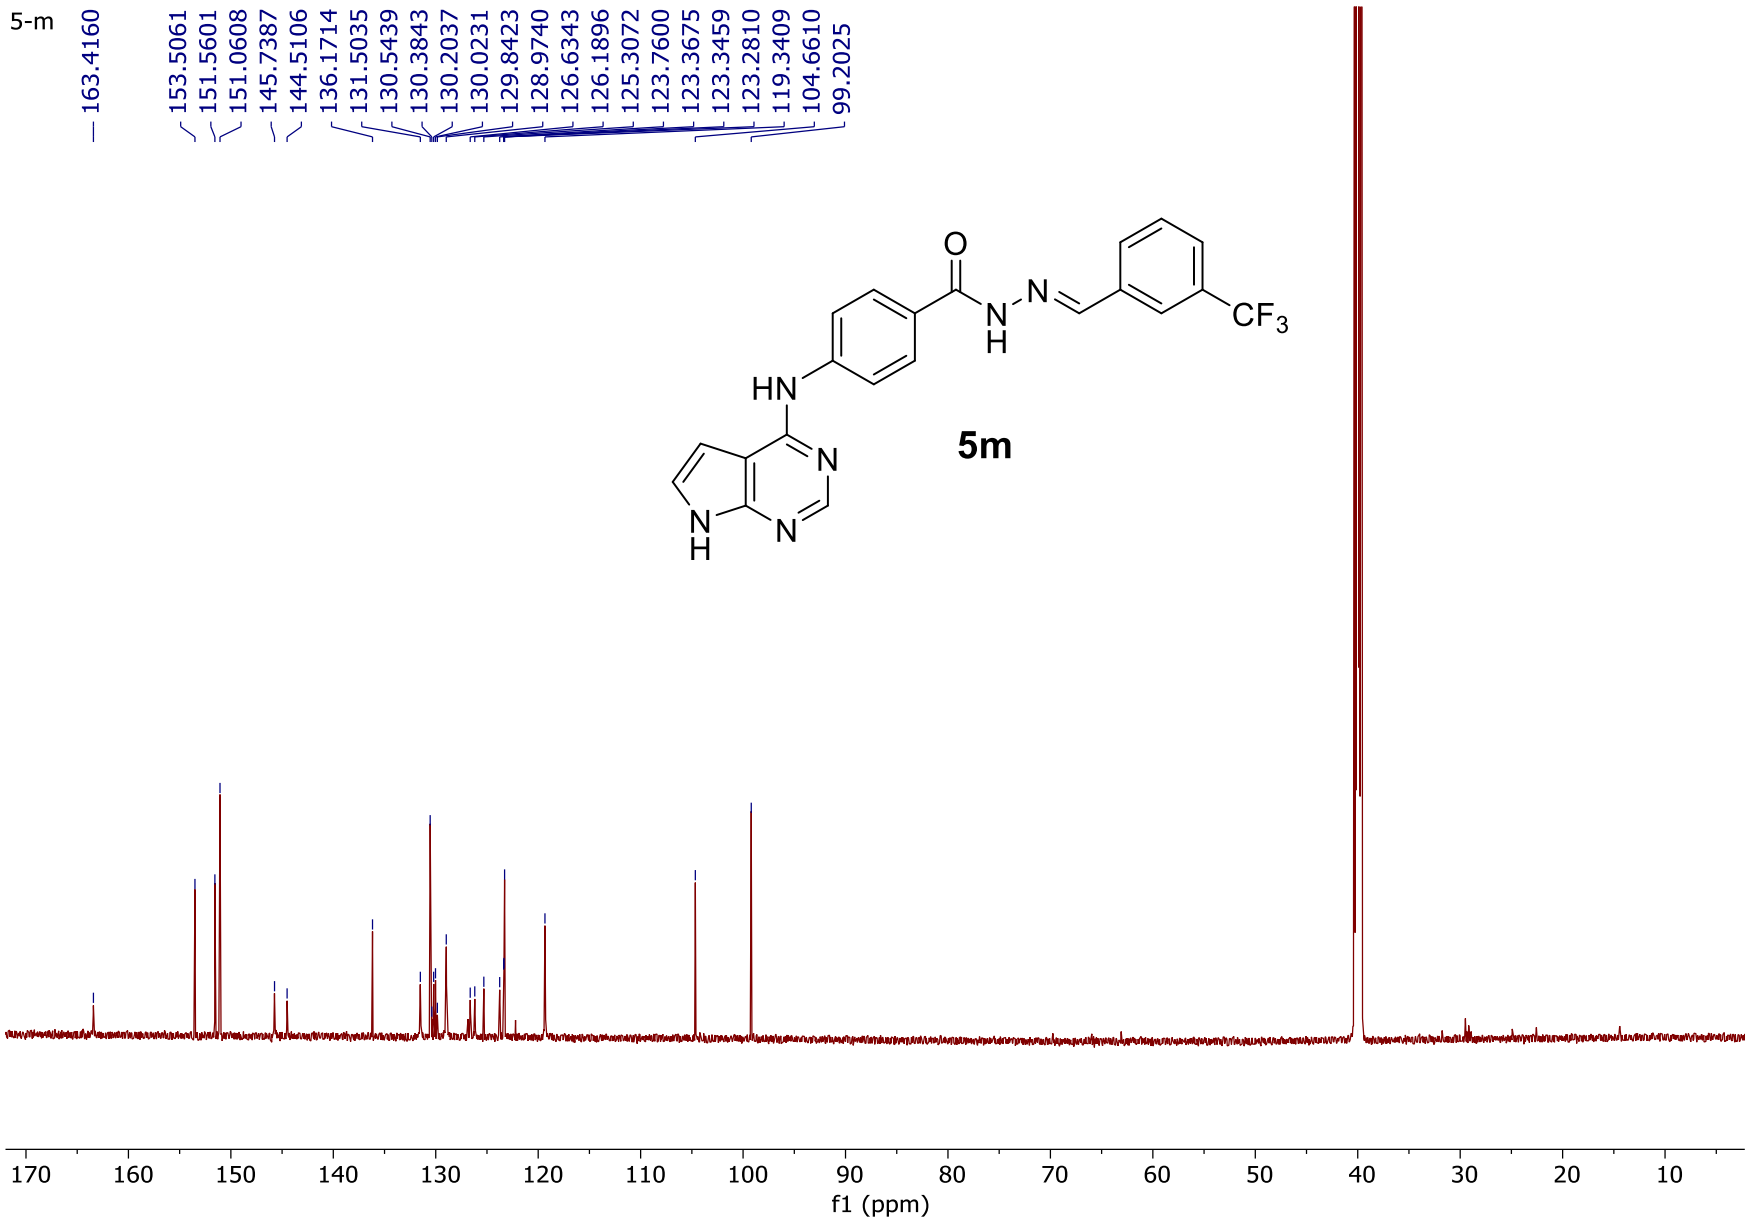

Mass spectra of **5m**

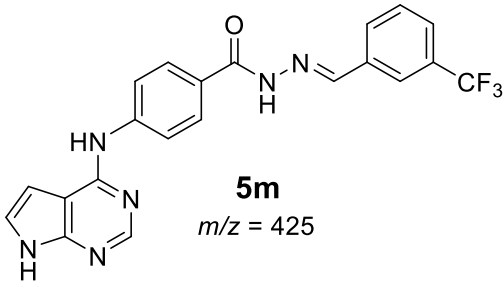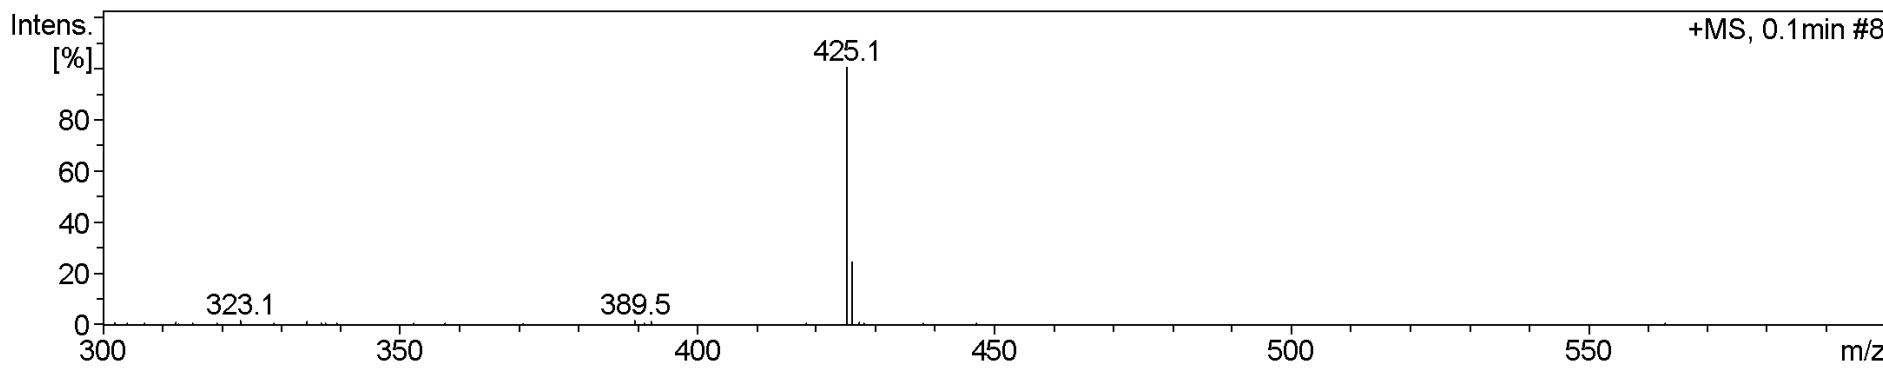

HMRS Mass spectra of **5m**

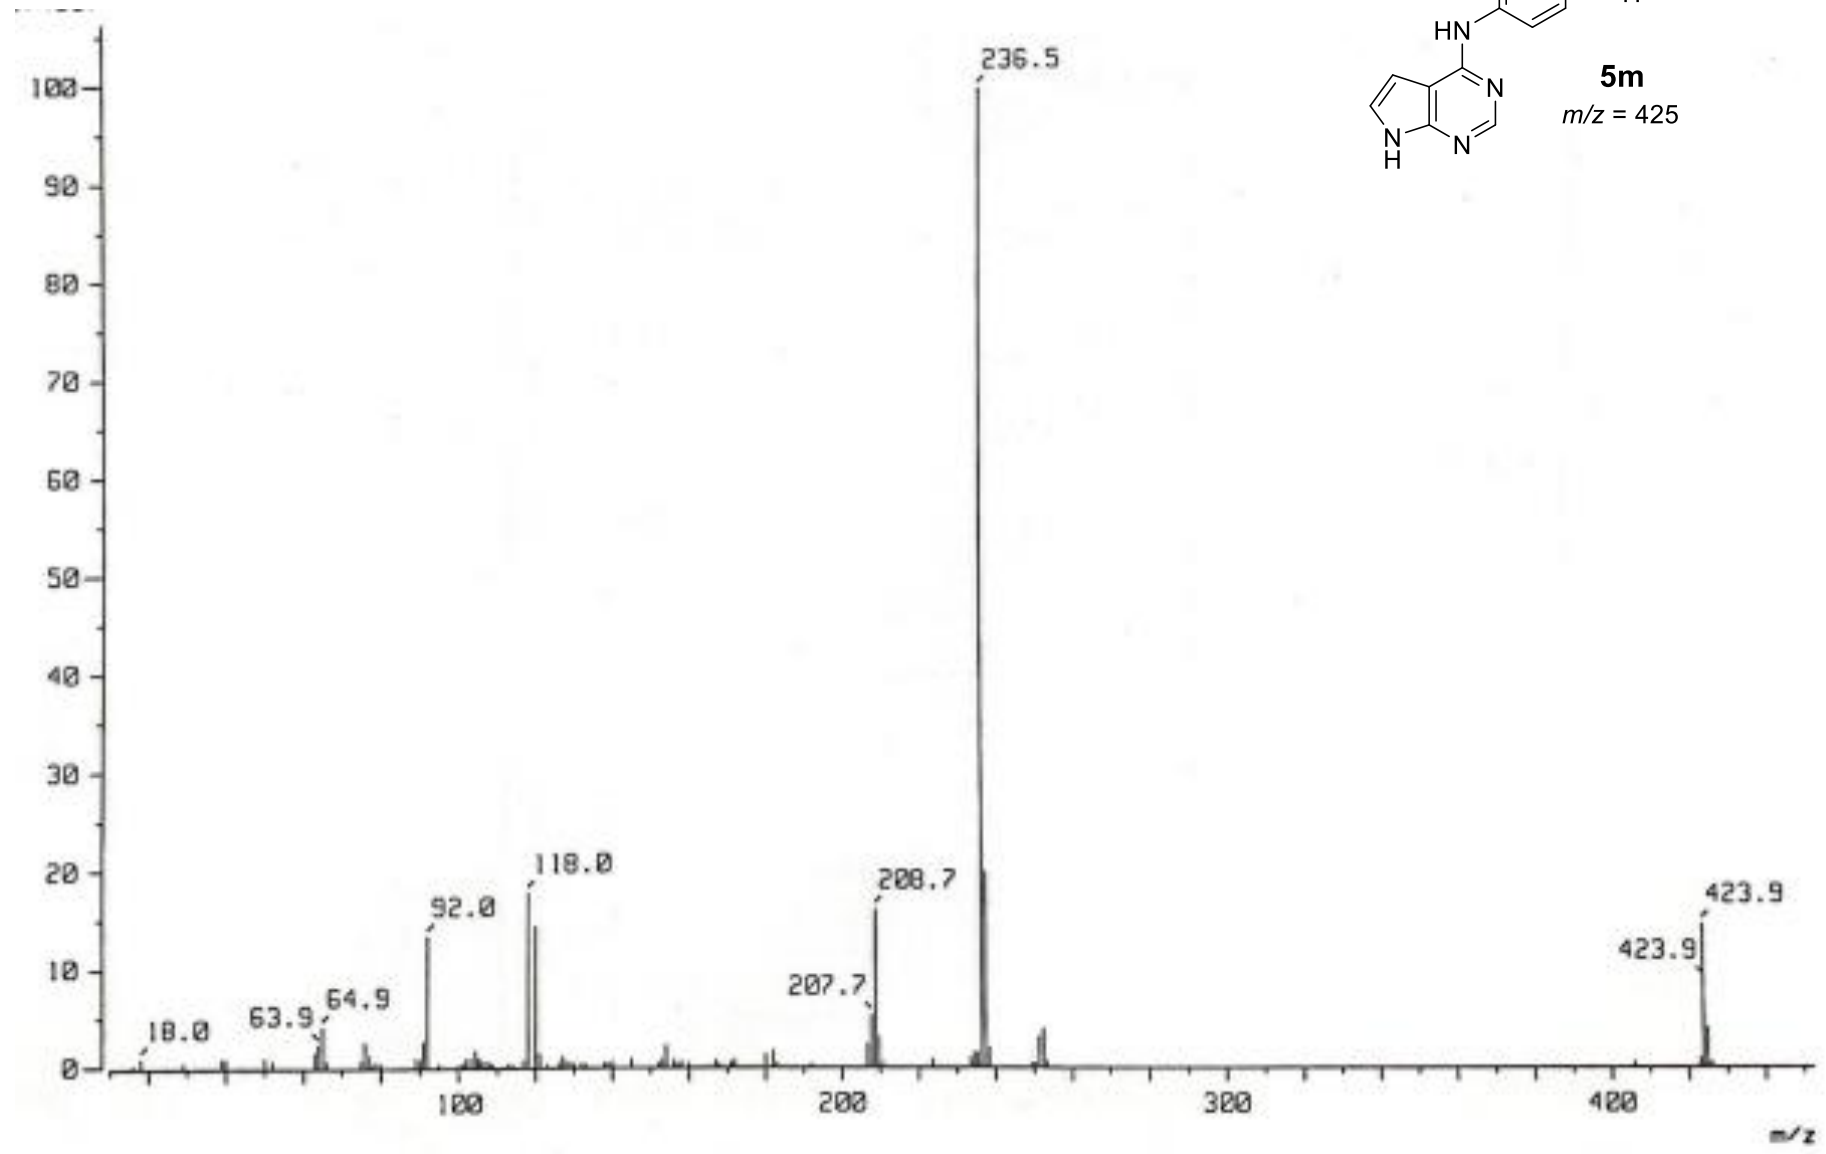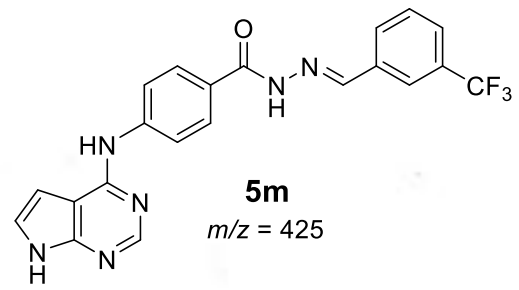

Supplement: s1 [file s1]
